# Supplementary material for: The Genome Sequence of the North-European Cucumber (Cucumis sativus L.) Unravels Evolutionary Adaptation Mechanisms in Plants
Source: PLoS One. 2011 Jul 28;6(7):e22728. doi: 10.1371/journal.pone.0022728 (PMC3145757; doi:10.1371/journal.pone.0022728)
Supplement: Dataset S3 — Comparison of the composition of the genes belonging to the different (BP, MF, CC) Gene Ontology functional groups (GOAN) of the two cucumber varieties. (XLS) [file pone.0022728.s003.xls]

## Sheet: Biological Process
Biological Process GOAN	B10 line gene counts	9930 line gene counts	% of B10 line genes (%)	% of B10 line genes (%)	Relative differentiation of genes in functional groups between B10 and 9930 genomes
1,3-beta-glucan biosynthetic process	14	17	0.000913302	0.0011356	0.804243
abaxial cell fate specification	0	1	0	6.68003e-05	NA
abscisic acid biosynthetic process	1	2	6.52358e-05	0.000133601	0.48829
abscisic acid mediated signaling pathway	4	2	0.000260943	0.000133601	1.95316
acquisition of desiccation tolerance	1	1	6.52358e-05	6.68003e-05	0.97658
actin cytoskeleton organization	16	13	0.00104377	0.000868403	1.20195
actin filament capping	1	1	6.52358e-05	6.68003e-05	0.97658
actin filament organization	1	2	6.52358e-05	0.000133601	0.48829
actin filament polymerization	3	2	0.000195707	0.000133601	1.46487
actin filament-based process	1	1	6.52358e-05	6.68003e-05	0.97658
actin nucleation	0	1	0	6.68003e-05	NA
activation of protein kinase C activity by G-protein coupled receptor protein signaling pathway	11	9	0.000717594	0.000601202	1.1936
acyl-CoA biosynthetic process	1	1	6.52358e-05	6.68003e-05	0.97658
acyl-CoA metabolic process	1	1	6.52358e-05	6.68003e-05	0.97658
acylglycerol transport	1	1	6.52358e-05	6.68003e-05	0.97658
adaxial/abaxial axis specification	1	2	6.52358e-05	0.000133601	0.48829
adenine salvage	4	4	0.000260943	0.000267201	0.97658
adenine transport	1	1	6.52358e-05	6.68003e-05	0.97658
aerobic respiration	3	3	0.000195707	0.000200401	0.97658
alanyl-tRNA aminoacylation	2	2	0.000130472	0.000133601	0.97658
alcohol metabolic process	9	8	0.000587122	0.000534402	1.09865
allantoin catabolic process	2	2	0.000130472	0.000133601	0.97658
aluminum ion transport	1	1	6.52358e-05	6.68003e-05	0.97658
amine metabolic process	9	8	0.000587122	0.000534402	1.09865
amino acid import	0	1	0	6.68003e-05	NA
amino acid transport	14	14	0.000913302	0.000935204	0.97658
amyloplast organization	3	2	0.000195707	0.000133601	1.46487
anaerobic glycolysis	2	3	0.000130472	0.000200401	0.651054
anion transport	8	8	0.000521887	0.000534402	0.97658
anther development	2	2	0.000130472	0.000133601	0.97658
apoptosis	82	84	0.00534934	0.00561122	0.953328
arginine biosynthetic process	9	7	0.000587122	0.000467602	1.2556
arginine biosynthetic process via ornithine	2	2	0.000130472	0.000133601	0.97658
arginine catabolic process	1	1	6.52358e-05	6.68003e-05	0.97658
arginine catabolic process to glutamate	1	0	6.52358e-05	0	NA
arginyl-tRNA aminoacylation	1	1	6.52358e-05	6.68003e-05	0.97658
aromatic amino acid family biosynthetic process	16	14	0.00104377	0.000935204	1.11609
aromatic amino acid family metabolic process	3	4	0.000195707	0.000267201	0.732435
asparagine biosynthetic process	4	3	0.000260943	0.000200401	1.30211
asparaginyl-tRNA aminoacylation	2	2	0.000130472	0.000133601	0.97658
aspartate family amino acid biosynthetic process	1	1	6.52358e-05	6.68003e-05	0.97658
aspartyl-tRNA aminoacylation	4	4	0.000260943	0.000267201	0.97658
ATP biosynthetic process	60	56	0.00391415	0.00374081	1.04634
ATP metabolic process	5	3	0.000326179	0.000200401	1.62763
ATP synthesis coupled electron transport	6	3	0.000391415	0.000200401	1.95316
ATP synthesis coupled proton transport	33	28	0.00215278	0.00187041	1.15097
ATP-dependent chromatin remodeling	1	1	6.52358e-05	6.68003e-05	0.97658
attachment of peroxisome to chloroplast	1	0	6.52358e-05	0	NA
autophagy	6	6	0.000391415	0.000400802	0.97658
auxin efflux	1	2	6.52358e-05	0.000133601	0.48829
auxin homeostasis	1	0	6.52358e-05	0	NA
auxin mediated signaling pathway	60	54	0.00391415	0.00360721	1.08509
auxin metabolic process	2	2	0.000130472	0.000133601	0.97658
auxin polar transport	4	2	0.000260943	0.000133601	1.95316
bacteriochlorophyll biosynthetic process	1	1	6.52358e-05	6.68003e-05	0.97658
barrier septum formation	4	5	0.000260943	0.000334001	0.781264
base-excision repair	17	16	0.00110901	0.0010688	1.03762
basipetal auxin transport	2	2	0.000130472	0.000133601	0.97658
biosynthetic process	116	115	0.00756736	0.00768203	0.985072
biotin biosynthetic process	2	2	0.000130472	0.000133601	0.97658
blue light signaling pathway	3	2	0.000195707	0.000133601	1.46487
branched chain family amino acid biosynthetic process	12	11	0.00078283	0.000734803	1.06536
branched chain family amino acid metabolic process	2	1	0.000130472	6.68003e-05	1.95316
brassinosteroid mediated signaling pathway	4	5	0.000260943	0.000334001	0.781264
calcium ion transport	16	18	0.00104377	0.0012024	0.868071
callose deposition during defense response	2	1	0.000130472	6.68003e-05	1.95316
callose deposition in cell wall during defense response	1	1	6.52358e-05	6.68003e-05	0.97658
cAMP biosynthetic process	4	3	0.000260943	0.000200401	1.30211
carbohydrate biosynthetic process	3	4	0.000195707	0.000267201	0.732435
carbohydrate metabolic process	429	391	0.0279862	0.0261189	1.07149
carbohydrate phosphorylation	2	3	0.000130472	0.000200401	0.651054
carbohydrate transport	48	48	0.00313132	0.00320641	0.97658
carbon utilization	3	4	0.000195707	0.000267201	0.732435
carbon utilization by fixation of carbon dioxide	4	1	0.000260943	6.68003e-05	3.90632
carboxylic acid metabolic process	11	10	0.000717594	0.000668003	1.07424
carotenoid biosynthetic process	7	6	0.000456651	0.000400802	1.13934
carpel development	0	1	0	6.68003e-05	NA
cation transport	74	75	0.00482745	0.00501002	0.963559
cell adhesion	3	3	0.000195707	0.000200401	0.97658
cell communication	3	5	0.000195707	0.000334001	0.585948
cell cycle	34	33	0.00221802	0.00220441	1.00617
cell cycle arrest	3	5	0.000195707	0.000334001	0.585948
cell death	21	21	0.00136995	0.00140281	0.97658
cell differentiation	7	5	0.000456651	0.000334001	1.36721
cell division	61	64	0.00397939	0.00427522	0.930803
cell fate determination	3	2	0.000195707	0.000133601	1.46487
cell growth	4	3	0.000260943	0.000200401	1.30211
cell proliferation	8	6	0.000521887	0.000400802	1.30211
cell redox homeostasis	94	96	0.00613217	0.00641283	0.956235
cell surface receptor linked signal transduction	1	1	6.52358e-05	6.68003e-05	0.97658
cell tip growth	1	1	6.52358e-05	6.68003e-05	0.97658
cell wall biogenesis	1	2	6.52358e-05	0.000133601	0.48829
cell wall macromolecule catabolic process	25	26	0.0016309	0.00173681	0.93902
cell wall modification	50	51	0.00326179	0.00340681	0.957432
cell wall organization	77	64	0.00502316	0.00427522	1.17495
cellular aldehyde metabolic process	6	6	0.000391415	0.000400802	0.97658
cellular amino acid and derivative metabolic process	5	4	0.000326179	0.000267201	1.22073
cellular amino acid biosynthetic process	49	45	0.00319656	0.00300601	1.06339
cellular amino acid derivative biosynthetic process	4	4	0.000260943	0.000267201	0.97658
cellular amino acid metabolic process	34	32	0.00221802	0.00213761	1.03762
cellular aromatic compound metabolic process	3	3	0.000195707	0.000200401	0.97658
cellular biosynthetic process	3	3	0.000195707	0.000200401	0.97658
cellular calcium ion homeostasis	1	1	6.52358e-05	6.68003e-05	0.97658
cellular carbohydrate metabolic process	6	8	0.000391415	0.000534402	0.732435
cellular component organization	13	11	0.000848066	0.000734803	1.15414
cellular glucan metabolic process	26	26	0.00169613	0.00173681	0.97658
cellular ion homeostasis	0	2	0	0.000133601	NA
cellular iron ion homeostasis	1	1	6.52358e-05	6.68003e-05	0.97658
cellular metabolic process	60	58	0.00391415	0.00387442	1.01026
cellular metal ion homeostasis	2	2	0.000130472	0.000133601	0.97658
cellular process	9	9	0.000587122	0.000601202	0.97658
cellular protein metabolic process	17	14	0.00110901	0.000935204	1.18585
cellular response to nitrogen starvation	1	1	6.52358e-05	6.68003e-05	0.97658
cellular response to phosphate starvation	1	1	6.52358e-05	6.68003e-05	0.97658
cellularization of endosperm	1	1	6.52358e-05	6.68003e-05	0.97658
cellulose biosynthetic process	43	42	0.00280514	0.00280561	0.999832
cellulose catabolic process	3	4	0.000195707	0.000267201	0.732435
cellulose microfibril organization	1	1	6.52358e-05	6.68003e-05	0.97658
centrolateral axis specification	1	1	6.52358e-05	6.68003e-05	0.97658
centromeric heterochromatin formation	0	1	0	6.68003e-05	NA
ceramide metabolic process	3	2	0.000195707	0.000133601	1.46487
chitin catabolic process	15	14	0.000978537	0.000935204	1.04634
chloride transport	10	7	0.000652358	0.000467602	1.39511
chlorophyll biosynthetic process	9	9	0.000587122	0.000601202	0.97658
chlorophyll catabolic process	3	1	0.000195707	6.68003e-05	2.92974
chloroplast fission	4	3	0.000260943	0.000200401	1.30211
chloroplast organization	10	9	0.000652358	0.000601202	1.08509
chloroplast RNA processing	1	1	6.52358e-05	6.68003e-05	0.97658
cholesterol transport	4	7	0.000260943	0.000467602	0.558046
chorismate metabolic process	3	3	0.000195707	0.000200401	0.97658
chromatin assembly or disassembly	23	31	0.00150042	0.00207081	0.72456
chromatin modification	14	12	0.000913302	0.000801603	1.13934
chromatin organization	0	1	0	6.68003e-05	NA
chromatin remodeling	2	2	0.000130472	0.000133601	0.97658
chromatin silencing	4	4	0.000260943	0.000267201	0.97658
chromosome condensation	2	1	0.000130472	6.68003e-05	1.95316
chromosome organization	7	5	0.000456651	0.000334001	1.36721
chromosome segregation	1	1	6.52358e-05	6.68003e-05	0.97658
circadian rhythm	0	1	0	6.68003e-05	NA
citrate transport	3	3	0.000195707	0.000200401	0.97658
clathrin coat assembly	9	10	0.000587122	0.000668003	0.878922
cobalamin biosynthetic process	2	2	0.000130472	0.000133601	0.97658
cobalt ion transport	1	1	6.52358e-05	6.68003e-05	0.97658
coenzyme A biosynthetic process	2	2	0.000130472	0.000133601	0.97658
coenzyme A metabolic process	3	2	0.000195707	0.000133601	1.46487
coenzyme M biosynthetic process	1	1	6.52358e-05	6.68003e-05	0.97658
copper ion transport	12	10	0.00078283	0.000668003	1.1719
cortical microtubule organization	1	0	6.52358e-05	0	NA
cotyledon development	2	1	0.000130472	6.68003e-05	1.95316
cotyledon vascular tissue pattern formation	2	4	0.000130472	0.000267201	0.48829
C-terminal protein amino acid methylation	1	1	6.52358e-05	6.68003e-05	0.97658
CTP biosynthetic process	3	3	0.000195707	0.000200401	0.97658
cuticle development	1	1	6.52358e-05	6.68003e-05	0.97658
cuticle hydrocarbon biosynthetic process	2	2	0.000130472	0.000133601	0.97658
cyanate metabolic process	1	1	6.52358e-05	6.68003e-05	0.97658
cysteine biosynthetic process	6	4	0.000391415	0.000267201	1.46487
cysteine biosynthetic process from serine	8	8	0.000521887	0.000534402	0.97658
cysteine metabolic process	1	1	6.52358e-05	6.68003e-05	0.97658
cysteinyl-tRNA aminoacylation	2	2	0.000130472	0.000133601	0.97658
cytidine metabolic process	0	1	0	6.68003e-05	NA
cytochrome b6f complex assembly	4	5	0.000260943	0.000334001	0.781264
cytochrome complex assembly	6	5	0.000391415	0.000334001	1.1719
cytokinesis	2	2	0.000130472	0.000133601	0.97658
cytokinin mediated signaling pathway	0	1	0	6.68003e-05	NA
cytokinin metabolic process	8	8	0.000521887	0.000534402	0.97658
cytoskeleton organization	10	12	0.000652358	0.000801603	0.813817
D-amino acid catabolic process	1	1	6.52358e-05	6.68003e-05	0.97658
'de novo' IMP biosynthetic process	4	5	0.000260943	0.000334001	0.781264
'de novo' pyrimidine base biosynthetic process	8	8	0.000521887	0.000534402	0.97658
deadenylation-independent decapping of nuclear-transcribed mRNA	2	1	0.000130472	6.68003e-05	1.95316
de-etiolation	2	2	0.000130472	0.000133601	0.97658
defense response	127	136	0.00828495	0.00908484	0.911954
defense response to bacterium	10	11	0.000652358	0.000734803	0.8878
defense response to bacterium, incompatible interaction	6	7	0.000391415	0.000467602	0.837069
defense response to fungus	7	11	0.000456651	0.000734803	0.62146
defense response to fungus, incompatible interaction	4	3	0.000260943	0.000200401	1.30211
defense response to oomycetes	1	0	6.52358e-05	0	NA
defense response to virus	2	1	0.000130472	6.68003e-05	1.95316
deoxyribonucleoside diphosphate metabolic process	1	1	6.52358e-05	6.68003e-05	0.97658
dephosphorylation	18	21	0.00117424	0.00140281	0.837069
detection of bacterium	1	1	6.52358e-05	6.68003e-05	0.97658
detection of gravity	3	2	0.000195707	0.000133601	1.46487
detection of mechanical stimulus	6	4	0.000391415	0.000267201	1.46487
developmental process	2	2	0.000130472	0.000133601	0.97658
diaminopimelate biosynthetic process	2	2	0.000130472	0.000133601	0.97658
dipeptide transport	1	1	6.52358e-05	6.68003e-05	0.97658
DNA catabolic process	3	3	0.000195707	0.000200401	0.97658
DNA demethylation	1	1	6.52358e-05	6.68003e-05	0.97658
DNA endoreduplication	1	2	6.52358e-05	0.000133601	0.48829
DNA integration	179	199	0.0116772	0.0132933	0.878432
DNA mediated transformation	3	3	0.000195707	0.000200401	0.97658
DNA metabolic process	28	32	0.0018266	0.00213761	0.854508
DNA methylation	12	9	0.00078283	0.000601202	1.30211
DNA methylation on cytosine	0	2	0	0.000133601	NA
DNA recombination	26	22	0.00169613	0.00146961	1.15414
DNA repair	80	73	0.00521887	0.00487642	1.07023
DNA replication	74	73	0.00482745	0.00487642	0.989958
DNA replication initiation	10	8	0.000652358	0.000534402	1.22073
DNA replication, synthesis of RNA primer	2	2	0.000130472	0.000133601	0.97658
DNA strand elongation during DNA replication	1	1	6.52358e-05	6.68003e-05	0.97658
DNA topological change	11	13	0.000717594	0.000868403	0.826337
DNA unwinding during replication	6	8	0.000391415	0.000534402	0.732435
DNA-dependent DNA replication	1	2	6.52358e-05	0.000133601	0.48829
dolichol biosynthetic process	0	1	0	6.68003e-05	NA
double fertilization forming a zygote and endosperm	2	2	0.000130472	0.000133601	0.97658
double-strand break repair	1	1	6.52358e-05	6.68003e-05	0.97658
double-strand break repair via homologous recombination	1	2	6.52358e-05	0.000133601	0.48829
double-strand break repair via nonhomologous end joining	2	2	0.000130472	0.000133601	0.97658
D-ribose metabolic process	6	5	0.000391415	0.000334001	1.1719
dTMP biosynthetic process	1	1	6.52358e-05	6.68003e-05	0.97658
D-xylose metabolic process	1	1	6.52358e-05	6.68003e-05	0.97658
electron transport chain	35	28	0.00228325	0.00187041	1.22073
embryo sac development	1	1	6.52358e-05	6.68003e-05	0.97658
embryonic development	3	5	0.000195707	0.000334001	0.585948
embryonic development ending in seed dormancy	27	24	0.00176137	0.00160321	1.09865
embryonic meristem development	1	1	6.52358e-05	6.68003e-05	0.97658
embryonic morphogenesis	1	0	6.52358e-05	0	NA
endocytosis	2	2	0.000130472	0.000133601	0.97658
endoplasmic reticulum unfolded protein response	0	1	0	6.68003e-05	NA
endosperm development	2	0	0.000130472	0	NA
epidermal cell differentiation	2	1	0.000130472	6.68003e-05	1.95316
ER to Golgi vesicle-mediated transport	13	10	0.000848066	0.000668003	1.26955
error-prone translesion synthesis	1	1	6.52358e-05	6.68003e-05	0.97658
establishment of vesicle localization	1	0	6.52358e-05	0	NA
ethanol oxidation	1	2	6.52358e-05	0.000133601	0.48829
ethylene mediated signaling pathway	13	12	0.000848066	0.000801603	1.05796
exocytosis	20	19	0.00130472	0.00126921	1.02798
extracellular polysaccharide biosynthetic process	1	1	6.52358e-05	6.68003e-05	0.97658
farnesyl diphosphate metabolic process	1	1	6.52358e-05	6.68003e-05	0.97658
fatty acid beta-oxidation	6	5	0.000391415	0.000334001	1.1719
fatty acid biosynthetic process	90	89	0.00587122	0.00594522	0.987553
fatty acid catabolic process	1	2	6.52358e-05	0.000133601	0.48829
fatty acid metabolic process	10	9	0.000652358	0.000601202	1.08509
flavonoid biosynthetic process	4	3	0.000260943	0.000200401	1.30211
flavonol biosynthetic process	2	3	0.000130472	0.000200401	0.651054
floral meristem determinacy	2	2	0.000130472	0.000133601	0.97658
floral organ abscission	1	1	6.52358e-05	6.68003e-05	0.97658
floral organ development	1	2	6.52358e-05	0.000133601	0.48829
flower development	8	9	0.000521887	0.000601202	0.868071
folic acid and derivative biosynthetic process	13	11	0.000848066	0.000734803	1.15414
folic acid and derivative metabolic process	5	3	0.000326179	0.000200401	1.62763
folic acid biosynthetic process	0	1	0	6.68003e-05	NA
formaldehyde metabolic process	1	1	6.52358e-05	6.68003e-05	0.97658
fructose 2,6-bisphosphate metabolic process	1	1	6.52358e-05	6.68003e-05	0.97658
fructose metabolic process	1	1	6.52358e-05	6.68003e-05	0.97658
fumarate metabolic process	1	1	6.52358e-05	6.68003e-05	0.97658
galactolipid biosynthetic process	1	1	6.52358e-05	6.68003e-05	0.97658
galactose metabolic process	7	7	0.000456651	0.000467602	0.97658
gametophyte development	1	1	6.52358e-05	6.68003e-05	0.97658
GDP-mannose metabolic process	1	1	6.52358e-05	6.68003e-05	0.97658
GDP-mannose transport	1	1	6.52358e-05	6.68003e-05	0.97658
gene silencing	3	2	0.000195707	0.000133601	1.46487
gene silencing by RNA	3	4	0.000195707	0.000267201	0.732435
gibberellic acid mediated signaling pathway	1	1	6.52358e-05	6.68003e-05	0.97658
glucan biosynthetic process	5	5	0.000326179	0.000334001	0.97658
gluconeogenesis	4	4	0.000260943	0.000267201	0.97658
glucose catabolic process	1	0	6.52358e-05	0	NA
glucose mediated signaling pathway	1	1	6.52358e-05	6.68003e-05	0.97658
glucose metabolic process	9	9	0.000587122	0.000601202	0.97658
glucosylceramide catabolic process	2	2	0.000130472	0.000133601	0.97658
glucuronoxylan biosynthetic process	1	0	6.52358e-05	0	NA
glutamate biosynthetic process	4	3	0.000260943	0.000200401	1.30211
glutamate metabolic process	5	5	0.000326179	0.000334001	0.97658
glutamine biosynthetic process	5	2	0.000326179	0.000133601	2.44145
glutamine metabolic process	8	8	0.000521887	0.000534402	0.97658
glutamyl-tRNA aminoacylation	2	2	0.000130472	0.000133601	0.97658
glutathione biosynthetic process	2	2	0.000130472	0.000133601	0.97658
glutathione metabolic process	2	2	0.000130472	0.000133601	0.97658
glycerol ether metabolic process	4	5	0.000260943	0.000334001	0.781264
glycerol metabolic process	9	9	0.000587122	0.000601202	0.97658
glycerol-3-phosphate catabolic process	4	6	0.000260943	0.000400802	0.651054
glycerol-3-phosphate metabolic process	6	8	0.000391415	0.000534402	0.732435
glycerolipid biosynthetic process	0	1	0	6.68003e-05	NA
glycerolipid metabolic process	0	1	0	6.68003e-05	NA
glycine biosynthetic process	1	1	6.52358e-05	6.68003e-05	0.97658
glycine catabolic process	6	5	0.000391415	0.000334001	1.1719
glycine decarboxylation via glycine cleavage system	3	2	0.000195707	0.000133601	1.46487
glycine metabolic process	7	6	0.000456651	0.000400802	1.13934
glycogen biosynthetic process	5	6	0.000326179	0.000400802	0.813817
glycolipid biosynthetic process	1	1	6.52358e-05	6.68003e-05	0.97658
glycolipid transport	3	3	0.000195707	0.000200401	0.97658
glycolysis	49	46	0.00319656	0.00307281	1.04027
glycyl-tRNA aminoacylation	4	4	0.000260943	0.000267201	0.97658
glyoxysome organization	0	1	0	6.68003e-05	NA
GMP biosynthetic process	2	2	0.000130472	0.000133601	0.97658
Golgi organization	3	2	0.000195707	0.000133601	1.46487
Golgi vesicle transport	3	3	0.000195707	0.000200401	0.97658
GPI anchor biosynthetic process	11	10	0.000717594	0.000668003	1.07424
GPI anchor metabolic process	1	2	6.52358e-05	0.000133601	0.48829
G-protein coupled receptor protein signaling pathway	16	16	0.00104377	0.0010688	0.97658
green leaf volatile biosynthetic process	1	1	6.52358e-05	6.68003e-05	0.97658
Group I intron splicing	1	1	6.52358e-05	6.68003e-05	0.97658
Group II intron splicing	3	3	0.000195707	0.000200401	0.97658
growth	1	1	6.52358e-05	6.68003e-05	0.97658
GTP biosynthetic process	3	3	0.000195707	0.000200401	0.97658
guanine transport	1	1	6.52358e-05	6.68003e-05	0.97658
guanosine tetraphosphate metabolic process	6	6	0.000391415	0.000400802	0.97658
guard cell differentiation	1	0	6.52358e-05	0	NA
heat acclimation	4	4	0.000260943	0.000267201	0.97658
heme biosynthetic process	3	3	0.000195707	0.000200401	0.97658
heme O biosynthetic process	1	1	6.52358e-05	6.68003e-05	0.97658
heme oxidation	2	2	0.000130472	0.000133601	0.97658
heme transport	2	1	0.000130472	6.68003e-05	1.95316
hemolysis by symbiont of host erythrocytes	1	1	6.52358e-05	6.68003e-05	0.97658
hexose metabolic process	3	4	0.000195707	0.000267201	0.732435
histidine biosynthetic process	8	8	0.000521887	0.000534402	0.97658
histidine catabolic process	2	2	0.000130472	0.000133601	0.97658
histidyl-tRNA aminoacylation	2	2	0.000130472	0.000133601	0.97658
histone deacetylation	6	4	0.000391415	0.000267201	1.46487
histone H3-K36 methylation	1	1	6.52358e-05	6.68003e-05	0.97658
histone H3-K4 methylation	1	1	6.52358e-05	6.68003e-05	0.97658
histone H3-K9 demethylation	3	3	0.000195707	0.000200401	0.97658
histone H3-K9 methylation	1	1	6.52358e-05	6.68003e-05	0.97658
histone modification	8	8	0.000521887	0.000534402	0.97658
hydrogen peroxide biosynthetic process	2	1	0.000130472	6.68003e-05	1.95316
hydrogen peroxide catabolic process	5	7	0.000326179	0.000467602	0.697557
hyperosmotic response	1	1	6.52358e-05	6.68003e-05	0.97658
hyperosmotic salinity response	5	3	0.000326179	0.000200401	1.62763
immune response	2	3	0.000130472	0.000200401	0.651054
IMP biosynthetic process	2	2	0.000130472	0.000133601	0.97658
indoleacetic acid conjugate metabolic process	1	1	6.52358e-05	6.68003e-05	0.97658
indolebutyric acid metabolic process	0	1	0	6.68003e-05	NA
induction of programmed cell death	0	1	0	6.68003e-05	NA
innate immune response	37	36	0.00241373	0.00240481	1.00371
inositol biosynthetic process	1	1	6.52358e-05	6.68003e-05	0.97658
inositol catabolic process	2	2	0.000130472	0.000133601	0.97658
inositol trisphosphate metabolic process	6	6	0.000391415	0.000400802	0.97658
interspecies interaction between organisms	1	2	6.52358e-05	0.000133601	0.48829
intracellular protein transport	125	124	0.00815448	0.00828323	0.984456
intracellular sequestering of iron ion	1	1	6.52358e-05	6.68003e-05	0.97658
intracellular signaling cascade	30	30	0.00195707	0.00200401	0.97658
intracellular transport	5	4	0.000326179	0.000267201	1.22073
intra-Golgi vesicle-mediated transport	2	1	0.000130472	6.68003e-05	1.95316
ion transport	97	91	0.00632788	0.00607882	1.04097
iron ion transport	1	2	6.52358e-05	0.000133601	0.48829
iron-sulfur cluster assembly	10	11	0.000652358	0.000734803	0.8878
isocitrate metabolic process	1	2	6.52358e-05	0.000133601	0.48829
isoleucine biosynthetic process	6	6	0.000391415	0.000400802	0.97658
isoleucyl-tRNA aminoacylation	4	4	0.000260943	0.000267201	0.97658
isopentenyl diphosphate biosynthetic process, mevalonate pathway	1	1	6.52358e-05	6.68003e-05	0.97658
isopentenyl diphosphate biosynthetic process, mevalonate-independent pathway	3	3	0.000195707	0.000200401	0.97658
isoprenoid biosynthetic process	16	16	0.00104377	0.0010688	0.97658
jasmonic acid biosynthetic process	0	1	0	6.68003e-05	NA
jasmonic acid mediated signaling pathway	2	3	0.000130472	0.000200401	0.651054
keto-3-deoxy-D-manno-octulosonic acid biosynthetic process	0	1	0	6.68003e-05	NA
killing of cells of another organism	1	1	6.52358e-05	6.68003e-05	0.97658
L-arabinose metabolic process	1	2	6.52358e-05	0.000133601	0.48829
L-ascorbic acid biosynthetic process	1	1	6.52358e-05	6.68003e-05	0.97658
lateral root development	2	2	0.000130472	0.000133601	0.97658
lateral root morphogenesis	3	2	0.000195707	0.000133601	1.46487
leaf development	11	15	0.000717594	0.001002	0.716159
leaf morphogenesis	5	4	0.000326179	0.000267201	1.22073
leaf senescence	1	1	6.52358e-05	6.68003e-05	0.97658
leaf vascular tissue pattern formation	7	9	0.000456651	0.000601202	0.759562
leucine biosynthetic process	2	2	0.000130472	0.000133601	0.97658
leucyl-tRNA aminoacylation	2	2	0.000130472	0.000133601	0.97658
leukotriene biosynthetic process	3	2	0.000195707	0.000133601	1.46487
lignin biosynthetic process	1	1	6.52358e-05	6.68003e-05	0.97658
lignin catabolic process	16	14	0.00104377	0.000935204	1.11609
lignin metabolic process	2	2	0.000130472	0.000133601	0.97658
lipid A biosynthetic process	2	2	0.000130472	0.000133601	0.97658
lipid biosynthetic process	65	67	0.00424033	0.00447562	0.947429
lipid catabolic process	41	36	0.00267467	0.00240481	1.11222
lipid glycosylation	8	9	0.000521887	0.000601202	0.868071
lipid metabolic process	201	186	0.0131124	0.0124248	1.05534
lipid transport	26	27	0.00169613	0.00180361	0.940411
lipoate biosynthetic process	4	4	0.000260943	0.000267201	0.97658
lipoic acid metabolic process	1	0	6.52358e-05	0	NA
lipopolysaccharide biosynthetic process	0	1	0	6.68003e-05	NA
longitudinal axis specification	1	1	6.52358e-05	6.68003e-05	0.97658
L-phenylalanine biosynthetic process	6	6	0.000391415	0.000400802	0.97658
L-phenylalanine catabolic process	16	15	0.00104377	0.001002	1.04169
L-serine biosynthetic process	4	5	0.000260943	0.000334001	0.781264
L-serine metabolic process	6	5	0.000391415	0.000334001	1.1719
lysine biosynthetic process	2	1	0.000130472	6.68003e-05	1.95316
lysine biosynthetic process via diaminopimelate	6	4	0.000391415	0.000267201	1.46487
lysyl-tRNA aminoacylation	4	3	0.000260943	0.000200401	1.30211
macromolecule biosynthetic process	1	2	6.52358e-05	0.000133601	0.48829
magnesium ion transport	1	1	6.52358e-05	6.68003e-05	0.97658
maintenance of fidelity during DNA-dependent DNA replication	2	2	0.000130472	0.000133601	0.97658
maintenance of floral organ identity	2	1	0.000130472	6.68003e-05	1.95316
maintenance of meiotic sister chromatid cohesion	1	1	6.52358e-05	6.68003e-05	0.97658
malate metabolic process	14	12	0.000913302	0.000801603	1.13934
malate transport	2	2	0.000130472	0.000133601	0.97658
mannose biosynthetic process	2	2	0.000130472	0.000133601	0.97658
mannose metabolic process	7	3	0.000456651	0.000200401	2.27869
maturation of LSU-rRNA from tetracistronic rRNA transcript (SSU-rRNA, LSU-rRNA, 4.5S-rRNA, 5S-rRNA)	1	1	6.52358e-05	6.68003e-05	0.97658
maturation of SSU-rRNA from tetracistronic rRNA transcript (SSU-rRNA, LSU-rRNA, 4.5S-rRNA, 5S-rRNA)	1	1	6.52358e-05	6.68003e-05	0.97658
mature ribosome assembly	2	2	0.000130472	0.000133601	0.97658
megagametogenesis	0	1	0	6.68003e-05	NA
meiosis	5	5	0.000326179	0.000334001	0.97658
meiotic DNA double-strand break formation	2	2	0.000130472	0.000133601	0.97658
meiotic DNA double-strand break processing	1	1	6.52358e-05	6.68003e-05	0.97658
meiotic prophase I	0	1	0	6.68003e-05	NA
menaquinone biosynthetic process	1	1	6.52358e-05	6.68003e-05	0.97658
meristem determinacy	1	1	6.52358e-05	6.68003e-05	0.97658
meristem development	1	1	6.52358e-05	6.68003e-05	0.97658
meristem maintenance	1	1	6.52358e-05	6.68003e-05	0.97658
meristem structural organization	4	6	0.000260943	0.000400802	0.651054
metabolic process	1319	1253	0.0860461	0.0837007	1.02802
metal ion transport	73	77	0.00476222	0.00514362	0.925849
methionine biosynthetic process	8	7	0.000521887	0.000467602	1.11609
methionine metabolic process	1	1	6.52358e-05	6.68003e-05	0.97658
methionine salvage	6	5	0.000391415	0.000334001	1.1719
methionyl-tRNA aminoacylation	3	2	0.000195707	0.000133601	1.46487
methylation	13	11	0.000848066	0.000734803	1.15414
microgametogenesis	1	1	6.52358e-05	6.68003e-05	0.97658
microsporogenesis	2	3	0.000130472	0.000200401	0.651054
microtubule cytoskeleton organization	7	8	0.000456651	0.000534402	0.854508
microtubule-based movement	68	65	0.00443604	0.00434202	1.02165
microtubule-based process	19	15	0.00123948	0.001002	1.237
miRNA catabolic process	1	0	6.52358e-05	0	NA
mismatch repair	11	13	0.000717594	0.000868403	0.826337
mitochondrial electron transport, cytochrome c to oxygen	0	2	0	0.000133601	NA
mitochondrial electron transport, succinate to ubiquinone	1	0	6.52358e-05	0	NA
mitochondrial electron transport, ubiquinol to cytochrome c	2	2	0.000130472	0.000133601	0.97658
mitochondrial fission	1	2	6.52358e-05	0.000133601	0.48829
mitochondrial genome maintenance	0	1	0	6.68003e-05	NA
mitochondrial transport	5	5	0.000326179	0.000334001	0.97658
mitosis	14	12	0.000913302	0.000801603	1.13934
mitotic cell cycle	1	1	6.52358e-05	6.68003e-05	0.97658
modification-dependent protein catabolic process	79	75	0.00515363	0.00501002	1.02866
molybdenum incorporation into molybdenum-molybdopterin complex	0	2	0	0.000133601	NA
molybdopterin cofactor biosynthetic process	2	2	0.000130472	0.000133601	0.97658
Mo-molybdopterin cofactor biosynthetic process	6	8	0.000391415	0.000534402	0.732435
mRNA capping	2	3	0.000130472	0.000200401	0.651054
mRNA catabolic process	3	4	0.000195707	0.000267201	0.732435
mRNA cleavage involved in gene silencing by miRNA	1	0	6.52358e-05	0	NA
mRNA export from nucleus	4	4	0.000260943	0.000267201	0.97658
mRNA modification	5	5	0.000326179	0.000334001	0.97658
mRNA polyadenylation	1	1	6.52358e-05	6.68003e-05	0.97658
mRNA processing	30	28	0.00195707	0.00187041	1.04634
mRNA transport	0	1	0	6.68003e-05	NA
multicellular organismal development	22	21	0.00143519	0.00140281	1.02308
multidimensional cell growth	4	5	0.000260943	0.000334001	0.781264
multidrug transport	46	44	0.00300085	0.00293921	1.02097
myo-inositol transport	1	1	6.52358e-05	6.68003e-05	0.97658
NAD biosynthetic process	5	5	0.000326179	0.000334001	0.97658
NAD(P)H dehydrogenase complex assembly	2	2	0.000130472	0.000133601	0.97658
NADH dehydrogenase complex (plastoquinone) assembly	1	1	6.52358e-05	6.68003e-05	0.97658
negative gravitropism	3	2	0.000195707	0.000133601	1.46487
negative regulation of apoptosis	1	1	6.52358e-05	6.68003e-05	0.97658
negative regulation of brassinosteroid biosynthetic process	1	1	6.52358e-05	6.68003e-05	0.97658
negative regulation of catalytic activity	45	37	0.00293561	0.00247161	1.18773
negative regulation of cell proliferation	2	2	0.000130472	0.000133601	0.97658
negative regulation of cellular defense response	0	1	0	6.68003e-05	NA
negative regulation of cyclin-dependent protein kinase activity	0	1	0	6.68003e-05	NA
negative regulation of defense response	0	1	0	6.68003e-05	NA
negative regulation of DNA endoreduplication	1	1	6.52358e-05	6.68003e-05	0.97658
negative regulation of DNA recombination	0	1	0	6.68003e-05	NA
negative regulation of ethylene mediated signaling pathway	1	1	6.52358e-05	6.68003e-05	0.97658
negative regulation of flower development	4	4	0.000260943	0.000267201	0.97658
negative regulation of gibberellic acid mediated signaling pathway	0	1	0	6.68003e-05	NA
negative regulation of histone acetylation	1	0	6.52358e-05	0	NA
negative regulation of long-day photoperiodism, flowering	2	2	0.000130472	0.000133601	0.97658
negative regulation of phosphoprotein phosphatase activity	0	1	0	6.68003e-05	NA
negative regulation of photomorphogenesis	1	1	6.52358e-05	6.68003e-05	0.97658
negative regulation of programmed cell death	2	1	0.000130472	6.68003e-05	1.95316
negative regulation of seed germination	1	1	6.52358e-05	6.68003e-05	0.97658
negative regulation of short-day photoperiodism, flowering	2	2	0.000130472	0.000133601	0.97658
negative regulation of systemic acquired resistance	1	0	6.52358e-05	0	NA
negative regulation of telomere maintenance via telomerase	0	1	0	6.68003e-05	NA
negative regulation of transcription	7	7	0.000456651	0.000467602	0.97658
negative regulation of transcription from RNA polymerase III promoter	1	1	6.52358e-05	6.68003e-05	0.97658
negative regulation of translation	2	2	0.000130472	0.000133601	0.97658
negative regulation of translational elongation	2	2	0.000130472	0.000133601	0.97658
nicotianamine biosynthetic process	4	4	0.000260943	0.000267201	0.97658
nitric oxide biosynthetic process	0	1	0	6.68003e-05	NA
nitric oxide mediated signal transduction	1	1	6.52358e-05	6.68003e-05	0.97658
nitrogen compound metabolic process	19	13	0.00123948	0.000868403	1.42731
Notch signaling pathway	4	4	0.000260943	0.000267201	0.97658
N-terminal protein myristoylation	1	1	6.52358e-05	6.68003e-05	0.97658
nuclear mRNA splicing, via spliceosome	9	8	0.000587122	0.000534402	1.09865
nuclear-transcribed mRNA catabolic process, exonucleolytic	1	0	6.52358e-05	0	NA
nuclear-transcribed mRNA catabolic process, nonsense-mediated decay	2	2	0.000130472	0.000133601	0.97658
nucleobase, nucleoside, nucleotide and nucleic acid metabolic process	49	43	0.00319656	0.00287241	1.11285
nucleobase, nucleoside, nucleotide and nucleic acid transport	1	1	6.52358e-05	6.68003e-05	0.97658
nucleocytoplasmic transport	5	6	0.000326179	0.000400802	0.813817
nucleoside metabolic process	13	13	0.000848066	0.000868403	0.97658
nucleoside transport	1	1	6.52358e-05	6.68003e-05	0.97658
nucleosome assembly	29	27	0.00189184	0.00180361	1.04892
nucleotide biosynthetic process	5	5	0.000326179	0.000334001	0.97658
nucleotide-excision repair	14	13	0.000913302	0.000868403	1.0517
nucleotide-sugar transport	3	3	0.000195707	0.000200401	0.97658
oligopeptide transport	60	54	0.00391415	0.00360721	1.08509
oligosaccharide biosynthetic process	1	1	6.52358e-05	6.68003e-05	0.97658
oligosaccharide metabolic process	2	2	0.000130472	0.000133601	0.97658
one-carbon metabolic process	18	18	0.00117424	0.0012024	0.97658
organ growth	2	2	0.000130472	0.000133601	0.97658
organ morphogenesis	0	1	0	6.68003e-05	NA
organic anion transport	1	1	6.52358e-05	6.68003e-05	0.97658
ornithine catabolic process	1	0	6.52358e-05	0	NA
ovule development	1	3	6.52358e-05	0.000200401	0.325527
oxidation reduction	1375	1340	0.0896993	0.0895124	1.00209
oxygen and reactive oxygen species metabolic process	1	1	6.52358e-05	6.68003e-05	0.97658
oxygen transport	4	4	0.000260943	0.000267201	0.97658
oxylipin biosynthetic process	28	29	0.0018266	0.00193721	0.942905
pantothenate biosynthetic process	4	3	0.000260943	0.000200401	1.30211
para-aminobenzoic acid metabolic process	3	2	0.000195707	0.000133601	1.46487
pathogenesis	3	3	0.000195707	0.000200401	0.97658
pattern specification process	0	1	0	6.68003e-05	NA
penicillin biosynthetic process	1	1	6.52358e-05	6.68003e-05	0.97658
pentose-phosphate shunt	14	14	0.000913302	0.000935204	0.97658
pentose-phosphate shunt, non-oxidative branch	4	4	0.000260943	0.000267201	0.97658
peptide transport	2	3	0.000130472	0.000200401	0.651054
peptidoglycan biosynthetic process	3	3	0.000195707	0.000200401	0.97658
peptidoglycan-based cell wall biogenesis	1	1	6.52358e-05	6.68003e-05	0.97658
peptidyl-arginine methylation, to asymmetrical-dimethyl arginine	1	1	6.52358e-05	6.68003e-05	0.97658
peptidyl-diphthamide biosynthetic process from peptidyl-histidine	1	1	6.52358e-05	6.68003e-05	0.97658
peptidyl-histidine phosphorylation	13	15	0.000848066	0.001002	0.84637
peptidyl-lysine modification to hypusine	7	5	0.000456651	0.000334001	1.36721
peptidyl-proline hydroxylation to 4-hydroxy-L-proline	1	1	6.52358e-05	6.68003e-05	0.97658
peroxisome fission	2	3	0.000130472	0.000200401	0.651054
peroxisome organization	8	12	0.000521887	0.000801603	0.651054
petal development	2	1	0.000130472	6.68003e-05	1.95316
phagocytosis	4	5	0.000260943	0.000334001	0.781264
phenylalanyl-tRNA aminoacylation	5	5	0.000326179	0.000334001	0.97658
phenylpropanoid metabolic process	15	14	0.000978537	0.000935204	1.04634
phloem or xylem histogenesis	2	4	0.000130472	0.000267201	0.48829
phosphate metabolic process	4	3	0.000260943	0.000200401	1.30211
phosphate transport	8	8	0.000521887	0.000534402	0.97658
phosphatidic acid metabolic process	1	0	6.52358e-05	0	NA
phosphatidylcholine metabolic process	7	6	0.000456651	0.000400802	1.13934
phosphatidylethanolamine biosynthetic process	1	1	6.52358e-05	6.68003e-05	0.97658
phosphatidylinositol metabolic process	14	17	0.000913302	0.0011356	0.804243
phosphatidylserine biosynthetic process	2	2	0.000130472	0.000133601	0.97658
phosphoinositide phosphorylation	8	5	0.000521887	0.000334001	1.56253
phosphoinositide-mediated signaling	9	6	0.000587122	0.000400802	1.46487
phospholipid biosynthetic process	16	19	0.00104377	0.00126921	0.822383
phospholipid metabolic process	1	3	6.52358e-05	0.000200401	0.325527
phospholipid transport	9	8	0.000587122	0.000534402	1.09865
phosphorylation	25	24	0.0016309	0.00160321	1.01727
photoinhibition	2	1	0.000130472	6.68003e-05	1.95316
photomorphogenesis	2	3	0.000130472	0.000200401	0.651054
photoperiodism, flowering	1	1	6.52358e-05	6.68003e-05	0.97658
photoprotection	1	1	6.52358e-05	6.68003e-05	0.97658
photorespiration	2	1	0.000130472	6.68003e-05	1.95316
photosynthesis	36	30	0.00234849	0.00200401	1.1719
photosynthesis, light harvesting	18	18	0.00117424	0.0012024	0.97658
photosynthesis, light harvesting in photosystem I	0	1	0	6.68003e-05	NA
photosynthesis, light reaction	9	3	0.000587122	0.000200401	2.92974
photosynthetic electron transport chain	1	1	6.52358e-05	6.68003e-05	0.97658
photosynthetic electron transport in photosystem I	5	3	0.000326179	0.000200401	1.62763
photosynthetic electron transport in photosystem II	2	1	0.000130472	6.68003e-05	1.95316
photosystem II assembly	1	1	6.52358e-05	6.68003e-05	0.97658
photosystem II oxygen evolving complex assembly	1	1	6.52358e-05	6.68003e-05	0.97658
photosystem II stabilization	2	2	0.000130472	0.000133601	0.97658
phototropism	5	4	0.000326179	0.000267201	1.22073
phragmoplast formation	1	1	6.52358e-05	6.68003e-05	0.97658
phytochelatin biosynthetic process	2	2	0.000130472	0.000133601	0.97658
phytochromobilin biosynthetic process	2	2	0.000130472	0.000133601	0.97658
plant-type cell wall biogenesis	2	4	0.000130472	0.000267201	0.48829
plant-type cell wall organization	17	20	0.00110901	0.00133601	0.830093
plant-type hypersensitive response	2	2	0.000130472	0.000133601	0.97658
plasma membrane ATP synthesis coupled proton transport	2	0	0.000130472	0	NA
plasma membrane organization	1	1	6.52358e-05	6.68003e-05	0.97658
plasmodesmata-mediated intercellular transport	3	0	0.000195707	0	NA
plastid fission	2	2	0.000130472	0.000133601	0.97658
plastid organization	1	3	6.52358e-05	0.000200401	0.325527
plastid translation	1	1	6.52358e-05	6.68003e-05	0.97658
polarity specification of adaxial/abaxial axis	1	2	6.52358e-05	0.000133601	0.48829
pollen development	7	8	0.000456651	0.000534402	0.854508
pollen germination	1	1	6.52358e-05	6.68003e-05	0.97658
pollen maturation	1	1	6.52358e-05	6.68003e-05	0.97658
pollen sperm cell differentiation	1	1	6.52358e-05	6.68003e-05	0.97658
pollen tube development	5	5	0.000326179	0.000334001	0.97658
pollen tube growth	5	3	0.000326179	0.000200401	1.62763
pollen wall assembly	0	1	0	6.68003e-05	NA
poly(A)+ mRNA export from nucleus	1	1	6.52358e-05	6.68003e-05	0.97658
polyamine biosynthetic process	2	1	0.000130472	6.68003e-05	1.95316
polycistronic mRNA processing	1	1	6.52358e-05	6.68003e-05	0.97658
polysaccharide biosynthetic process	0	1	0	6.68003e-05	NA
polysaccharide catabolic process	13	11	0.000848066	0.000734803	1.15414
porphyrin biosynthetic process	10	10	0.000652358	0.000668003	0.97658
positive gravitropism	3	4	0.000195707	0.000267201	0.732435
positive regulation of actin nucleation	1	0	6.52358e-05	0	NA
positive regulation of anthocyanin metabolic process	1	1	6.52358e-05	6.68003e-05	0.97658
positive regulation of atrichoblast fate specification	0	1	0	6.68003e-05	NA
positive regulation of auxin biosynthetic process	0	1	0	6.68003e-05	NA
positive regulation of catalytic activity	1	1	6.52358e-05	6.68003e-05	0.97658
positive regulation of cell differentiation	1	0	6.52358e-05	0	NA
positive regulation of cell proliferation	2	1	0.000130472	6.68003e-05	1.95316
positive regulation of flower development	2	1	0.000130472	6.68003e-05	1.95316
positive regulation of gene expression	1	0	6.52358e-05	0	NA
positive regulation of gene-specific transcription	0	1	0	6.68003e-05	NA
positive regulation of hydrogen peroxide biosynthetic process	1	0	6.52358e-05	0	NA
positive regulation of RNA elongation from RNA polymerase II promoter	3	2	0.000195707	0.000133601	1.46487
positive regulation of sulfur metabolic process	2	1	0.000130472	6.68003e-05	1.95316
positive regulation of transcription	11	7	0.000717594	0.000467602	1.53463
positive regulation of transcription, DNA-dependent	2	1	0.000130472	6.68003e-05	1.95316
positive regulation of transferase activity	2	1	0.000130472	6.68003e-05	1.95316
positive regulation of translational elongation	5	4	0.000326179	0.000267201	1.22073
positive regulation of translational termination	5	4	0.000326179	0.000267201	1.22073
positive regulation of trichoblast fate specification	0	1	0	6.68003e-05	NA
positive regulation of vernalization response	1	1	6.52358e-05	6.68003e-05	0.97658
post-embryonic development	2	2	0.000130472	0.000133601	0.97658
post-embryonic root development	0	1	0	6.68003e-05	NA
posttranscriptional gene silencing by RNA	1	1	6.52358e-05	6.68003e-05	0.97658
post-translational protein modification	30	31	0.00195707	0.00207081	0.945078
potassium ion transport	44	44	0.00287038	0.00293921	0.97658
premeiotic DNA synthesis	1	1	6.52358e-05	6.68003e-05	0.97658
pre-microRNA export from nucleus	1	1	6.52358e-05	6.68003e-05	0.97658
prenylcysteine catabolic process	1	1	6.52358e-05	6.68003e-05	0.97658
primary metabolic process	1	1	6.52358e-05	6.68003e-05	0.97658
primary microRNA processing	1	0	6.52358e-05	0	NA
production of miRNAs involved in gene silencing by miRNA	1	0	6.52358e-05	0	NA
production of siRNA involved in RNA interference	2	1	0.000130472	6.68003e-05	1.95316
production of ta-siRNAs involved in RNA interference	1	1	6.52358e-05	6.68003e-05	0.97658
programmed cell death	1	0	6.52358e-05	0	NA
proline biosynthetic process	4	5	0.000260943	0.000334001	0.781264
proline catabolic process	1	1	6.52358e-05	6.68003e-05	0.97658
prolyl-tRNA aminoacylation	4	3	0.000260943	0.000200401	1.30211
proteasomal ubiquitin-dependent protein catabolic process	3	2	0.000195707	0.000133601	1.46487
protein amino acid ADP-ribosylation	4	4	0.000260943	0.000267201	0.97658
protein amino acid autophosphorylation	2	2	0.000130472	0.000133601	0.97658
protein amino acid deacetylation	4	4	0.000260943	0.000267201	0.97658
protein amino acid dephosphorylation	50	50	0.00326179	0.00334001	0.97658
protein amino acid glycosylation	39	36	0.0025442	0.00240481	1.05796
protein amino acid methylation	4	4	0.000260943	0.000267201	0.97658
protein amino acid N-linked glycosylation	4	5	0.000260943	0.000334001	0.781264
protein amino acid N-linked glycosylation via asparagine	2	2	0.000130472	0.000133601	0.97658
protein amino acid phosphorylation	866	851	0.0564942	0.056847	0.993794
protein amino acid prenylation	4	5	0.000260943	0.000334001	0.781264
protein arginylation	1	1	6.52358e-05	6.68003e-05	0.97658
protein catabolic process	17	20	0.00110901	0.00133601	0.830093
protein complex assembly	4	3	0.000260943	0.000200401	1.30211
protein complex disassembly	1	1	6.52358e-05	6.68003e-05	0.97658
protein deubiquitination	1	0	6.52358e-05	0	NA
protein export from nucleus	1	1	6.52358e-05	6.68003e-05	0.97658
protein folding	137	129	0.00893731	0.00861723	1.03714
protein import	3	2	0.000195707	0.000133601	1.46487
protein import into chloroplast stroma	0	1	0	6.68003e-05	NA
protein import into mitochondrial inner membrane	2	2	0.000130472	0.000133601	0.97658
protein import into mitochondrial matrix	3	3	0.000195707	0.000200401	0.97658
protein import into mitochondrial outer membrane	1	1	6.52358e-05	6.68003e-05	0.97658
protein import into nucleus	8	10	0.000521887	0.000668003	0.781264
protein import into peroxisome matrix	2	1	0.000130472	6.68003e-05	1.95316
protein insertion into membrane	6	6	0.000391415	0.000400802	0.97658
protein lipoylation	1	0	6.52358e-05	0	NA
protein localization	4	6	0.000260943	0.000400802	0.651054
protein maturation by peptide bond cleavage	1	1	6.52358e-05	6.68003e-05	0.97658
protein metabolic process	21	17	0.00136995	0.0011356	1.20636
protein modification process	23	24	0.00150042	0.00160321	0.935889
protein neddylation	1	2	6.52358e-05	0.000133601	0.48829
protein polymerization	16	13	0.00104377	0.000868403	1.20195
protein processing	5	5	0.000326179	0.000334001	0.97658
protein retention in ER lumen	7	6	0.000456651	0.000400802	1.13934
protein retention in Golgi apparatus	1	1	6.52358e-05	6.68003e-05	0.97658
protein secretion	3	4	0.000195707	0.000267201	0.732435
protein stabilization	2	1	0.000130472	6.68003e-05	1.95316
protein sumoylation	2	1	0.000130472	6.68003e-05	1.95316
protein targeting	4	3	0.000260943	0.000200401	1.30211
protein targeting to chloroplast	1	1	6.52358e-05	6.68003e-05	0.97658
protein targeting to membrane	0	1	0	6.68003e-05	NA
protein targeting to mitochondrion	2	3	0.000130472	0.000200401	0.651054
protein targeting to vacuole	1	2	6.52358e-05	0.000133601	0.48829
protein thiol-disulfide exchange	1	1	6.52358e-05	6.68003e-05	0.97658
protein transport	135	128	0.00880684	0.00855043	1.02999
protein ubiquitination	66	68	0.00430556	0.00454242	0.947857
protein-chromophore linkage	6	6	0.000391415	0.000400802	0.97658
protein-heme linkage	1	1	6.52358e-05	6.68003e-05	0.97658
protein-tetrapyrrole linkage	3	3	0.000195707	0.000200401	0.97658
proteolysis	371	375	0.0242025	0.0250501	0.966163
proteolysis involved in cellular protein catabolic process	13	15	0.000848066	0.001002	0.84637
proton transport	15	12	0.000978537	0.000801603	1.22073
proton-transporting ATP synthase complex assembly	1	1	6.52358e-05	6.68003e-05	0.97658
proximal/distal pattern formation	2	1	0.000130472	6.68003e-05	1.95316
pseudouridine synthesis	19	21	0.00123948	0.00140281	0.883573
purine base biosynthetic process	2	2	0.000130472	0.000133601	0.97658
purine base metabolic process	1	1	6.52358e-05	6.68003e-05	0.97658
purine nucleotide biosynthetic process	6	6	0.000391415	0.000400802	0.97658
purine nucleotide metabolic process	4	4	0.000260943	0.000267201	0.97658
purine ribonucleoside monophosphate biosynthetic process	2	2	0.000130472	0.000133601	0.97658
purine ribonucleoside salvage	3	3	0.000195707	0.000200401	0.97658
purine ribonucleotide biosynthetic process	1	1	6.52358e-05	6.68003e-05	0.97658
purine transport	3	4	0.000195707	0.000267201	0.732435
pyridine nucleotide biosynthetic process	3	4	0.000195707	0.000267201	0.732435
pyridine nucleotide salvage	0	1	0	6.68003e-05	NA
pyridoxal 5'-phosphate salvage	1	0	6.52358e-05	0	NA
pyridoxine biosynthetic process	4	3	0.000260943	0.000200401	1.30211
pyrimidine base biosynthetic process	1	1	6.52358e-05	6.68003e-05	0.97658
pyrimidine nucleotide biosynthetic process	5	5	0.000326179	0.000334001	0.97658
pyrimidine ribonucleotide biosynthetic process	1	1	6.52358e-05	6.68003e-05	0.97658
pyruvate metabolic process	2	2	0.000130472	0.000133601	0.97658
queuosine biosynthetic process	3	4	0.000195707	0.000267201	0.732435
radial axis specification	1	1	6.52358e-05	6.68003e-05	0.97658
radial pattern formation	3	4	0.000195707	0.000267201	0.732435
reciprocal meiotic recombination	2	3	0.000130472	0.000200401	0.651054
recognition of pollen	23	25	0.00150042	0.00167001	0.898454
red or far red light signaling pathway	3	3	0.000195707	0.000200401	0.97658
red, far-red light phototransduction	7	6	0.000456651	0.000400802	1.13934
reductive pentose-phosphate cycle	3	1	0.000195707	6.68003e-05	2.92974
regulation of actin filament depolymerization	1	0	6.52358e-05	0	NA
regulation of actin filament polymerization	3	4	0.000195707	0.000267201	0.732435
regulation of ARF GTPase activity	15	19	0.000978537	0.00126921	0.770984
regulation of ARF protein signal transduction	6	5	0.000391415	0.000334001	1.1719
regulation of barrier septum formation	2	2	0.000130472	0.000133601	0.97658
regulation of catalytic activity	3	3	0.000195707	0.000200401	0.97658
regulation of cell division	1	1	6.52358e-05	6.68003e-05	0.97658
regulation of cell shape	2	3	0.000130472	0.000200401	0.651054
regulation of cyclin-dependent protein kinase activity	1	1	6.52358e-05	6.68003e-05	0.97658
regulation of defense response to virus	0	1	0	6.68003e-05	NA
regulation of DNA repair	2	2	0.000130472	0.000133601	0.97658
regulation of embryo sac egg cell differentiation	1	1	6.52358e-05	6.68003e-05	0.97658
regulation of embryonic development	0	1	0	6.68003e-05	NA
regulation of epidermal cell division	1	1	6.52358e-05	6.68003e-05	0.97658
regulation of exocytosis	1	0	6.52358e-05	0	NA
regulation of floral meristem growth	1	1	6.52358e-05	6.68003e-05	0.97658
regulation of flower development	1	0	6.52358e-05	0	NA
regulation of gene expression, epigenetic	1	0	6.52358e-05	0	NA
regulation of gibberellin biosynthetic process	1	1	6.52358e-05	6.68003e-05	0.97658
regulation of glucosinolate biosynthetic process	1	0	6.52358e-05	0	NA
regulation of GTPase activity	3	4	0.000195707	0.000267201	0.732435
regulation of hydrogen peroxide metabolic process	1	1	6.52358e-05	6.68003e-05	0.97658
regulation of inflorescence meristem growth	1	1	6.52358e-05	6.68003e-05	0.97658
regulation of isopentenyl diphosphate biosynthetic process, mevalonate-independent pathway	0	1	0	6.68003e-05	NA
regulation of meristem development	1	1	6.52358e-05	6.68003e-05	0.97658
regulation of mitotic metaphase/anaphase transition	2	2	0.000130472	0.000133601	0.97658
regulation of nitrogen compound metabolic process	1	1	6.52358e-05	6.68003e-05	0.97658
regulation of nitrogen utilization	13	15	0.000848066	0.001002	0.84637
regulation of pH	8	7	0.000521887	0.000467602	1.11609
regulation of photomorphogenesis	1	1	6.52358e-05	6.68003e-05	0.97658
regulation of plant-type hypersensitive response	0	1	0	6.68003e-05	NA
regulation of pollen tube growth	2	1	0.000130472	6.68003e-05	1.95316
regulation of protein amino acid phosphorylation	2	1	0.000130472	6.68003e-05	1.95316
regulation of protein catabolic process	2	2	0.000130472	0.000133601	0.97658
regulation of protein localization	1	1	6.52358e-05	6.68003e-05	0.97658
regulation of protein metabolic process	30	32	0.00195707	0.00213761	0.915544
regulation of Rab GTPase activity	11	9	0.000717594	0.000601202	1.1936
regulation of RNA metabolic process	2	2	0.000130472	0.000133601	0.97658
regulation of root meristem growth	1	1	6.52358e-05	6.68003e-05	0.97658
regulation of S phase of mitotic cell cycle	1	1	6.52358e-05	6.68003e-05	0.97658
regulation of salicylic acid metabolic process	2	2	0.000130472	0.000133601	0.97658
regulation of seed germination	1	1	6.52358e-05	6.68003e-05	0.97658
regulation of signal transduction	7	6	0.000456651	0.000400802	1.13934
regulation of stomatal movement	1	1	6.52358e-05	6.68003e-05	0.97658
regulation of superoxide release	1	1	6.52358e-05	6.68003e-05	0.97658
regulation of timing of transition from vegetative to reproductive phase	2	1	0.000130472	6.68003e-05	1.95316
regulation of transcription	852	892	0.0555809	0.0595858	0.932787
regulation of transcription factor activity	4	4	0.000260943	0.000267201	0.97658
regulation of transcription from RNA polymerase II promoter	12	10	0.00078283	0.000668003	1.1719
regulation of transcription from RNA polymerase II promoter, global	1	0	6.52358e-05	0	NA
regulation of transcription termination	1	1	6.52358e-05	6.68003e-05	0.97658
regulation of transcription, DNA-dependent	515	506	0.0335965	0.0338009	0.99395
regulation of translation	1	1	6.52358e-05	6.68003e-05	0.97658
regulation of translational initiation	1	1	6.52358e-05	6.68003e-05	0.97658
regulation of unidimensional cell growth	1	2	6.52358e-05	0.000133601	0.48829
removal of superoxide radicals	1	2	6.52358e-05	0.000133601	0.48829
replication fork protection	1	1	6.52358e-05	6.68003e-05	0.97658
respiratory burst during defense response	1	0	6.52358e-05	0	NA
respiratory chain complex IV assembly	3	1	0.000195707	6.68003e-05	2.92974
respiratory electron transport chain	5	3	0.000326179	0.000200401	1.62763
respiratory gaseous exchange	3	3	0.000195707	0.000200401	0.97658
response to abscisic acid stimulus	6	11	0.000391415	0.000734803	0.53268
response to absence of light	1	1	6.52358e-05	6.68003e-05	0.97658
response to aluminum ion	1	1	6.52358e-05	6.68003e-05	0.97658
response to antibiotic	6	5	0.000391415	0.000334001	1.1719
response to auxin stimulus	11	9	0.000717594	0.000601202	1.1936
response to bacterium	8	9	0.000521887	0.000601202	0.868071
response to biotic stimulus	38	40	0.00247896	0.00267201	0.927751
response to blue light	1	0	6.52358e-05	0	NA
response to brassinosteroid stimulus	3	3	0.000195707	0.000200401	0.97658
response to cadmium ion	22	18	0.00143519	0.0012024	1.1936
response to chitin	9	10	0.000587122	0.000668003	0.878922
response to chlorate	1	1	6.52358e-05	6.68003e-05	0.97658
response to cold	14	13	0.000913302	0.000868403	1.0517
response to cytokinin stimulus	1	2	6.52358e-05	0.000133601	0.48829
response to desiccation	1	1	6.52358e-05	6.68003e-05	0.97658
response to DNA damage stimulus	21	18	0.00136995	0.0012024	1.13934
response to endoplasmic reticulum stress	0	1	0	6.68003e-05	NA
response to ethylene stimulus	1	0	6.52358e-05	0	NA
response to far red light	4	2	0.000260943	0.000133601	1.95316
response to freezing	2	1	0.000130472	6.68003e-05	1.95316
response to fungus	2	3	0.000130472	0.000200401	0.651054
response to gamma radiation	1	1	6.52358e-05	6.68003e-05	0.97658
response to gibberellin stimulus	3	4	0.000195707	0.000267201	0.732435
response to heat	12	12	0.00078283	0.000801603	0.97658
response to high light intensity	3	3	0.000195707	0.000200401	0.97658
response to histidine	1	1	6.52358e-05	6.68003e-05	0.97658
response to hormone stimulus	25	20	0.0016309	0.00133601	1.22073
response to hydrogen peroxide	2	2	0.000130472	0.000133601	0.97658
response to indolebutyric acid stimulus	0	1	0	6.68003e-05	NA
response to jasmonic acid stimulus	3	3	0.000195707	0.000200401	0.97658
response to leucine	1	1	6.52358e-05	6.68003e-05	0.97658
response to light stimulus	26	24	0.00169613	0.00160321	1.05796
response to low light intensity stimulus	0	1	0	6.68003e-05	NA
response to mechanical stimulus	1	0	6.52358e-05	0	NA
response to metal ion	3	3	0.000195707	0.000200401	0.97658
response to molecule of bacterial origin	4	5	0.000260943	0.000334001	0.781264
response to nematode	8	9	0.000521887	0.000601202	0.868071
response to osmotic stress	17	17	0.00110901	0.0011356	0.97658
response to oxidative stress	77	85	0.00502316	0.00567802	0.884667
response to ozone	0	1	0	6.68003e-05	NA
response to phenylalanine	1	1	6.52358e-05	6.68003e-05	0.97658
response to red light	4	2	0.000260943	0.000133601	1.95316
response to red or far red light	1	0	6.52358e-05	0	NA
response to salicylic acid stimulus	4	5	0.000260943	0.000334001	0.781264
response to salt stress	17	18	0.00110901	0.0012024	0.922326
response to starvation	1	0	6.52358e-05	0	NA
response to stimulus	1	1	6.52358e-05	6.68003e-05	0.97658
response to stress	124	120	0.00808924	0.00801603	1.00913
response to sucrose stimulus	2	1	0.000130472	6.68003e-05	1.95316
response to toxin	0	1	0	6.68003e-05	NA
response to UV	1	1	6.52358e-05	6.68003e-05	0.97658
response to UV-B	6	7	0.000391415	0.000467602	0.837069
response to virus	1	3	6.52358e-05	0.000200401	0.325527
response to water	3	3	0.000195707	0.000200401	0.97658
response to water deprivation	7	6	0.000456651	0.000400802	1.13934
response to wounding	4	5	0.000260943	0.000334001	0.781264
response to X-ray	1	1	6.52358e-05	6.68003e-05	0.97658
retrograde transport, endosome to Golgi	0	2	0	0.000133601	NA
retrograde vesicle-mediated transport, Golgi to ER	2	3	0.000130472	0.000200401	0.651054
rhythmic process	1	4	6.52358e-05	0.000267201	0.244145
riboflavin biosynthetic process	10	9	0.000652358	0.000601202	1.08509
ribonucleoside monophosphate biosynthetic process	2	2	0.000130472	0.000133601	0.97658
ribosomal small subunit biogenesis	1	2	6.52358e-05	0.000133601	0.48829
ribosome assembly	2	3	0.000130472	0.000200401	0.651054
ribosome biogenesis	17	16	0.00110901	0.0010688	1.03762
RNA 3'-end processing	3	3	0.000195707	0.000200401	0.97658
RNA capping	1	1	6.52358e-05	6.68003e-05	0.97658
RNA elongation	1	1	6.52358e-05	6.68003e-05	0.97658
RNA interference	1	1	6.52358e-05	6.68003e-05	0.97658
RNA metabolic process	13	13	0.000848066	0.000868403	0.97658
RNA methylation	2	1	0.000130472	6.68003e-05	1.95316
RNA modification	23	25	0.00150042	0.00167001	0.898454
RNA polyadenylation	3	3	0.000195707	0.000200401	0.97658
RNA processing	74	74	0.00482745	0.00494322	0.97658
RNA splicing	15	12	0.000978537	0.000801603	1.22073
RNA-dependent DNA replication	50	60	0.00326179	0.00400802	0.813817
root development	5	7	0.000326179	0.000467602	0.697557
root epidermal cell differentiation	1	1	6.52358e-05	6.68003e-05	0.97658
root hair cell differentiation	2	2	0.000130472	0.000133601	0.97658
root hair cell tip growth	1	1	6.52358e-05	6.68003e-05	0.97658
root morphogenesis	2	2	0.000130472	0.000133601	0.97658
rRNA methylation	4	3	0.000260943	0.000200401	1.30211
rRNA modification	5	4	0.000326179	0.000267201	1.22073
rRNA processing	39	35	0.0025442	0.00233801	1.08819
S-adenosylmethionine transport	1	0	6.52358e-05	0	NA
salicylic acid biosynthetic process	4	5	0.000260943	0.000334001	0.781264
salicylic acid mediated signaling pathway	0	1	0	6.68003e-05	NA
secondary cell wall biogenesis	1	0	6.52358e-05	0	NA
secondary shoot formation	1	1	6.52358e-05	6.68003e-05	0.97658
secretion by cell	1	1	6.52358e-05	6.68003e-05	0.97658
seed development	2	2	0.000130472	0.000133601	0.97658
seed germination	3	3	0.000195707	0.000200401	0.97658
seed maturation	0	1	0	6.68003e-05	NA
seed oilbody biogenesis	0	1	0	6.68003e-05	NA
senescence	2	1	0.000130472	6.68003e-05	1.95316
sensory perception	3	3	0.000195707	0.000200401	0.97658
seryl-tRNA aminoacylation	2	2	0.000130472	0.000133601	0.97658
sexual reproduction	9	10	0.000587122	0.000668003	0.878922
shoot development	6	7	0.000391415	0.000467602	0.837069
shoot morphogenesis	2	2	0.000130472	0.000133601	0.97658
short-chain fatty acid metabolic process	1	1	6.52358e-05	6.68003e-05	0.97658
signal peptide processing	5	6	0.000326179	0.000400802	0.813817
signal transduction	112	113	0.00730641	0.00754843	0.967938
siroheme biosynthetic process	1	1	6.52358e-05	6.68003e-05	0.97658
small GTPase mediated signal transduction	57	58	0.00371844	0.00387442	0.959743
sodium ion transport	21	20	0.00136995	0.00133601	1.02541
somatic cell DNA recombination	1	0	6.52358e-05	0	NA
somatic embryogenesis	0	1	0	6.68003e-05	NA
SOS response	3	2	0.000195707	0.000133601	1.46487
specification of floral organ identity	2	1	0.000130472	6.68003e-05	1.95316
spermatogenesis	1	0	6.52358e-05	0	NA
spermidine biosynthetic process	5	5	0.000326179	0.000334001	0.97658
spermidine catabolic process to deoxyhypusine, using deoxyhypusine synthase	1	0	6.52358e-05	0	NA
spermine biosynthetic process	4	4	0.000260943	0.000267201	0.97658
sphingolipid metabolic process	2	2	0.000130472	0.000133601	0.97658
spindle assembly	1	1	6.52358e-05	6.68003e-05	0.97658
spliceosome assembly	2	2	0.000130472	0.000133601	0.97658
spread of virus in host	1	1	6.52358e-05	6.68003e-05	0.97658
spread of virus in host, cell to cell	0	1	0	6.68003e-05	NA
SRP-dependent cotranslational protein targeting to membrane	10	8	0.000652358	0.000534402	1.22073
starch catabolic process	1	1	6.52358e-05	6.68003e-05	0.97658
steroid biosynthetic process	11	11	0.000717594	0.000734803	0.97658
steroid metabolic process	4	6	0.000260943	0.000400802	0.651054
sterol biosynthetic process	2	2	0.000130472	0.000133601	0.97658
sterol metabolic process	2	2	0.000130472	0.000133601	0.97658
stipule development	1	1	6.52358e-05	6.68003e-05	0.97658
stomatal complex patterning	1	0	6.52358e-05	0	NA
stomatal movement	1	2	6.52358e-05	0.000133601	0.48829
suberin biosynthetic process	1	1	6.52358e-05	6.68003e-05	0.97658
sucrose biosynthetic process	1	2	6.52358e-05	0.000133601	0.48829
sucrose metabolic process	8	6	0.000521887	0.000400802	1.30211
sucrose transport	3	3	0.000195707	0.000200401	0.97658
sugar mediated signaling pathway	2	2	0.000130472	0.000133601	0.97658
sulfate assimilation	6	6	0.000391415	0.000400802	0.97658
sulfate reduction	2	2	0.000130472	0.000133601	0.97658
sulfate transport	15	14	0.000978537	0.000935204	1.04634
sulfur metabolic process	2	3	0.000130472	0.000200401	0.651054
superoxide metabolic process	6	5	0.000391415	0.000334001	1.1719
suspensor development	1	1	6.52358e-05	6.68003e-05	0.97658
synapsis	1	2	6.52358e-05	0.000133601	0.48829
systemic acquired resistance	2	2	0.000130472	0.000133601	0.97658
tapetal layer development	1	1	6.52358e-05	6.68003e-05	0.97658
telomere capping	1	1	6.52358e-05	6.68003e-05	0.97658
telomere maintenance	2	2	0.000130472	0.000133601	0.97658
terpenoid biosynthetic process	10	9	0.000652358	0.000601202	1.08509
tetracycline transport	1	1	6.52358e-05	6.68003e-05	0.97658
tetrahydrobiopterin biosynthetic process	1	1	6.52358e-05	6.68003e-05	0.97658
tetrahydrofolate metabolic process	1	1	6.52358e-05	6.68003e-05	0.97658
tetrapyrrole biosynthetic process	4	4	0.000260943	0.000267201	0.97658
thiamin biosynthetic process	11	11	0.000717594	0.000734803	0.97658
thigmotropism	0	3	0	0.000200401	NA
threonine biosynthetic process	5	5	0.000326179	0.000334001	0.97658
threonine metabolic process	1	1	6.52358e-05	6.68003e-05	0.97658
threonyl-tRNA aminoacylation	2	2	0.000130472	0.000133601	0.97658
thylakoid membrane organization	2	2	0.000130472	0.000133601	0.97658
toxin catabolic process	1	1	6.52358e-05	6.68003e-05	0.97658
transcription	428	454	0.0279209	0.0303273	0.920653
transcription from plastid promoter	2	0	0.000130472	0	NA
transcription from RNA polymerase II promoter	3	2	0.000195707	0.000133601	1.46487
transcription from RNA polymerase III promoter	1	1	6.52358e-05	6.68003e-05	0.97658
transcription initiation	24	27	0.00156566	0.00180361	0.868071
transcription initiation from RNA polymerase II promoter	10	11	0.000652358	0.000734803	0.8878
transcription termination	1	1	6.52358e-05	6.68003e-05	0.97658
transcription, DNA-dependent	5	5	0.000326179	0.000334001	0.97658
transcription, RNA-dependent	1	0	6.52358e-05	0	NA
transcriptional attenuation by ribosome	1	1	6.52358e-05	6.68003e-05	0.97658
translation	320	286	0.0208755	0.0191049	1.09268
translational elongation	14	11	0.000913302	0.000734803	1.24292
translational frameshifting	5	4	0.000326179	0.000267201	1.22073
translational initiation	22	26	0.00143519	0.00173681	0.826337
translational termination	13	11	0.000848066	0.000734803	1.15414
transmembrane transport	539	507	0.0351621	0.0338677	1.03822
transport	608	555	0.0396634	0.0370741	1.06984
transposition, DNA-mediated	6	4	0.000391415	0.000267201	1.46487
trehalose biosynthetic process	15	14	0.000978537	0.000935204	1.04634
trehalose metabolic process	1	1	6.52358e-05	6.68003e-05	0.97658
tricarboxylic acid cycle	19	15	0.00123948	0.001002	1.237
trichoblast differentiation	1	0	6.52358e-05	0	NA
trichome branching	2	2	0.000130472	0.000133601	0.97658
trichome differentiation	1	2	6.52358e-05	0.000133601	0.48829
trichome morphogenesis	3	4	0.000195707	0.000267201	0.732435
triglyceride catabolic process	1	1	6.52358e-05	6.68003e-05	0.97658
tripeptide transport	1	1	6.52358e-05	6.68003e-05	0.97658
tRNA 3'-end processing	1	1	6.52358e-05	6.68003e-05	0.97658
tRNA aminoacylation	4	4	0.000260943	0.000267201	0.97658
tRNA aminoacylation for protein translation	44	45	0.00287038	0.00300601	0.954879
tRNA methylation	1	1	6.52358e-05	6.68003e-05	0.97658
tRNA modification	9	8	0.000587122	0.000534402	1.09865
tRNA processing	33	30	0.00215278	0.00200401	1.07424
tRNA pseudouridine synthesis	3	3	0.000195707	0.000200401	0.97658
tRNA splicing, via endonucleolytic cleavage and ligation	5	2	0.000326179	0.000133601	2.44145
tryptophan biosynthetic process	9	8	0.000587122	0.000534402	1.09865
tryptophan metabolic process	7	6	0.000456651	0.000400802	1.13934
tryptophanyl-tRNA aminoacylation	1	1	6.52358e-05	6.68003e-05	0.97658
tubulin complex assembly	1	1	6.52358e-05	6.68003e-05	0.97658
two-component signal transduction system (phosphorelay)	42	43	0.0027399	0.00287241	0.953869
tyrosine biosynthetic process	2	2	0.000130472	0.000133601	0.97658
tyrosine metabolic process	1	1	6.52358e-05	6.68003e-05	0.97658
tyrosyl-tRNA aminoacylation	2	2	0.000130472	0.000133601	0.97658
ubiquinone biosynthetic process	3	3	0.000195707	0.000200401	0.97658
ubiquitin-dependent protein catabolic process	74	73	0.00482745	0.00487642	0.989958
UDP-N-acetylgalactosamine biosynthetic process	1	1	6.52358e-05	6.68003e-05	0.97658
UDP-rhamnose biosynthetic process	1	2	6.52358e-05	0.000133601	0.48829
UMP biosynthetic process	4	4	0.000260943	0.000267201	0.97658
unidimensional cell growth	8	5	0.000521887	0.000334001	1.56253
unsaturated fatty acid biosynthetic process	2	1	0.000130472	6.68003e-05	1.95316
uracil salvage	1	1	6.52358e-05	6.68003e-05	0.97658
urea transport	0	1	0	6.68003e-05	NA
ureide catabolic process	1	1	6.52358e-05	6.68003e-05	0.97658
UTP biosynthetic process	3	3	0.000195707	0.000200401	0.97658
vacuolar transport	1	1	6.52358e-05	6.68003e-05	0.97658
vacuole biogenesis	2	2	0.000130472	0.000133601	0.97658
vacuole organization	1	2	6.52358e-05	0.000133601	0.48829
valine biosynthetic process	1	1	6.52358e-05	6.68003e-05	0.97658
valine metabolic process	4	4	0.000260943	0.000267201	0.97658
valyl-tRNA aminoacylation	3	4	0.000195707	0.000267201	0.732435
vegetative phase change	0	1	0	6.68003e-05	NA
vegetative to reproductive phase transition	4	4	0.000260943	0.000267201	0.97658
vesicle docking	1	1	6.52358e-05	6.68003e-05	0.97658
vesicle docking during exocytosis	9	10	0.000587122	0.000668003	0.878922
vesicle-mediated transport	87	89	0.00567552	0.00594522	0.954635
viral genome replication	1	0	6.52358e-05	0	NA
viral protein processing	0	1	0	6.68003e-05	NA
viral replication complex formation and maintenance	1	1	6.52358e-05	6.68003e-05	0.97658
viral reproduction	0	1	0	6.68003e-05	NA
virus induced gene silencing	1	1	6.52358e-05	6.68003e-05	0.97658
vitamin B6 metabolic process	1	1	6.52358e-05	6.68003e-05	0.97658
wax biosynthetic process	1	1	6.52358e-05	6.68003e-05	0.97658
xanthophyll metabolic process	1	1	6.52358e-05	6.68003e-05	0.97658
xylan catabolic process	3	3	0.000195707	0.000200401	0.97658
xylem and phloem pattern formation	1	1	6.52358e-05	6.68003e-05	0.97658
xylem development	2	0	0.000130472	0	NA
zinc ion transport	5	5	0.000326179	0.000334001	0.97658

## Sheet: Molecullar Function
Molecular Function GOAN	B10 line gene counts	9930 line gene counts	% of B10 line genes (%)	% of B10 line genes (%)	Relative differentiation of genes in functional groups between B10 and 9930 genomes
(+)-delta-cadinene synthase activity	1	1	2.80568e-05	2.86878e-05	0.978003
(iso)eugenol O-methyltransferase activity	2	3	5.61136e-05	8.60635e-05	0.652002
(R)-limonene synthase activity	1	2	2.80568e-05	5.73756e-05	0.489002
(S)-2-(5-amino-1-(5-phospho-D-ribosyl)imidazole-4-carboxamido)succinate AMP-lyase (fumarate-forming) activity	1	1	2.80568e-05	2.86878e-05	0.978003
(S)-2-hydroxy-acid oxidase activity	3	3	8.41704e-05	8.60635e-05	0.978003
[acyl-carrier-protein] S-malonyltransferase activity	1	1	2.80568e-05	2.86878e-05	0.978003
[myelin basic protein]-arginine N-methyltransferase activity	1	1	2.80568e-05	2.86878e-05	0.978003
[ribulose-bisphosphate carboxylase]-lysine N-methyltransferase activity	3	3	8.41704e-05	8.60635e-05	0.978003
1-(5-phosphoribosyl)-5-[(5-phosphoribosylamino)methylideneamino]imidazole-4-carboxamide isomerase activity	3	2	8.41704e-05	5.73756e-05	1.46701
1,2-alpha-L-fucosidase activity	1	1	2.80568e-05	2.86878e-05	0.978003
1,3-beta-glucan synthase activity	14	17	0.000392795	0.000487693	0.805415
1,4-alpha-glucan branching enzyme activity	3	3	8.41704e-05	8.60635e-05	0.978003
10-deacetylbaccatin III 10-O-acetyltransferase activity	2	2	5.61136e-05	5.73756e-05	0.978003
12-oxophytodienoate reductase activity	2	3	5.61136e-05	8.60635e-05	0.652002
15-hydroxyprostaglandin dehydrogenase (NAD+) activity	2	2	5.61136e-05	5.73756e-05	0.978003
1-acylglycerol-3-phosphate O-acyltransferase activity	7	7	0.000196398	0.000200815	0.978003
1-aminocyclopropane-1-carboxylate deaminase activity	1	0	2.80568e-05	0	NA
1-aminocyclopropane-1-carboxylate oxidase activity	1	1	2.80568e-05	2.86878e-05	0.978003
1-aminocyclopropane-1-carboxylate synthase activity	17	17	0.000476965	0.000487693	0.978003
1-deoxy-D-xylulose-5-phosphate reductoisomerase activity	1	1	2.80568e-05	2.86878e-05	0.978003
1-deoxy-D-xylulose-5-phosphate synthase activity	4	4	0.000112227	0.000114751	0.978003
1-phosphatidylinositol 4-kinase activity	6	4	0.000168341	0.000114751	1.46701
1-phosphatidylinositol-3-kinase activity	1	0	2.80568e-05	0	NA
1-phosphatidylinositol-3-phosphate 5-kinase activity	4	5	0.000112227	0.000143439	0.782403
1-phosphatidylinositol-4-phosphate 5-kinase activity	9	11	0.000252511	0.000315566	0.800185
2 iron, 2 sulfur cluster binding	25	22	0.00070142	0.000631132	1.11137
2,3-bisphosphoglycerate-dependent phosphoglycerate mutase activity	1	1	2.80568e-05	2.86878e-05	0.978003
2',3'-cyclic-nucleotide 3'-phosphodiesterase activity	3	1	8.41704e-05	2.86878e-05	2.93401
2,3-dihydro-2,3-dihydroxybenzoate dehydrogenase activity	5	3	0.000140284	8.60635e-05	1.63001
2,4-dienoyl-CoA reductase (NADPH) activity	1	1	2.80568e-05	2.86878e-05	0.978003
20-alpha-hydroxysteroid dehydrogenase activity	2	3	5.61136e-05	8.60635e-05	0.652002
2-alkenal reductase activity	290	287	0.00813647	0.0082334	0.988227
2-amino-4-hydroxy-6-hydroxymethyldihydropteridine diphosphokinase activity	1	1	2.80568e-05	2.86878e-05	0.978003
2-C-methyl-D-erythritol 2,4-cyclodiphosphate synthase activity	1	1	2.80568e-05	2.86878e-05	0.978003
2-C-methyl-D-erythritol 4-phosphate cytidylyltransferase activity	1	1	2.80568e-05	2.86878e-05	0.978003
2-dehydro-3-deoxyglucarate aldolase activity	1	1	2.80568e-05	2.86878e-05	0.978003
2-hydroxy-3-oxopropionate reductase activity	4	3	0.000112227	8.60635e-05	1.304
2-hydroxyglutarate dehydrogenase activity	1	1	2.80568e-05	2.86878e-05	0.978003
2-isopropylmalate synthase activity	1	1	2.80568e-05	2.86878e-05	0.978003
2-nitropropane dioxygenase activity	1	1	2.80568e-05	2.86878e-05	0.978003
2-polyprenyl-6-methoxy-1,4-benzoquinone methyltransferase activity	1	1	2.80568e-05	2.86878e-05	0.978003
3 iron, 4 sulfur cluster binding	1	1	2.80568e-05	2.86878e-05	0.978003
3'(2'),5'-bisphosphate nucleotidase activity	2	2	5.61136e-05	5.73756e-05	0.978003
3,4-dihydroxy-2-butanone-4-phosphate synthase activity	4	3	0.000112227	8.60635e-05	1.304
3,8-divinyl protochlorophyllide a 8-vinyl reductase activity	0	1	0	2.86878e-05	NA
3'-5' exonuclease activity	13	14	0.000364738	0.000401629	0.908146
3'-5'-exoribonuclease activity	9	13	0.000252511	0.000372942	0.677079
3-alpha(or 20-beta)-hydroxysteroid dehydrogenase activity	2	2	5.61136e-05	5.73756e-05	0.978003
3alpha,7alpha,12alpha-trihydroxy-5beta-cholest-24-enoyl-CoA hydratase activity	1	1	2.80568e-05	2.86878e-05	0.978003
3-beta-hydroxy-delta5-steroid dehydrogenase activity	7	7	0.000196398	0.000200815	0.978003
3-dehydroquinate dehydratase activity	3	3	8.41704e-05	8.60635e-05	0.978003
3-dehydroquinate synthase activity	1	1	2.80568e-05	2.86878e-05	0.978003
3-dehydrosphinganine reductase activity	1	1	2.80568e-05	2.86878e-05	0.978003
3-deoxy-7-phosphoheptulonate synthase activity	4	4	0.000112227	0.000114751	0.978003
3-deoxy-8-phosphooctulonate synthase activity	1	1	2.80568e-05	2.86878e-05	0.978003
3-deoxy-manno-octulosonate cytidylyltransferase activity	0	1	0	2.86878e-05	NA
3-hydroxybutyryl-CoA epimerase activity	3	2	8.41704e-05	5.73756e-05	1.46701
3-hydroxyisobutyrate dehydrogenase activity	2	2	5.61136e-05	5.73756e-05	0.978003
3-isopropylmalate dehydratase activity	2	2	5.61136e-05	5.73756e-05	0.978003
3-methyl-2-oxobutanoate dehydrogenase (2-methylpropanoyl-transferring) activity	1	1	2.80568e-05	2.86878e-05	0.978003
3-methyl-2-oxobutanoate hydroxymethyltransferase activity	1	1	2.80568e-05	2.86878e-05	0.978003
3-oxo-5-alpha-steroid 4-dehydrogenase activity	1	3	2.80568e-05	8.60635e-05	0.326001
3-oxoacyl-[acyl-carrier-protein] reductase activity	18	20	0.000505022	0.000573756	0.880203
3-oxoacyl-[acyl-carrier-protein] synthase activity	4	4	0.000112227	0.000114751	0.978003
3-phosphoshikimate 1-carboxyvinyltransferase activity	1	1	2.80568e-05	2.86878e-05	0.978003
3'-tRNA processing endoribonuclease activity	1	1	2.80568e-05	2.86878e-05	0.978003
4 iron, 4 sulfur cluster binding	30	21	0.000841704	0.000602444	1.39715
4-(cytidine 5'-diphospho)-2-C-methyl-D-erythritol kinase activity	2	1	5.61136e-05	2.86878e-05	1.95601
4,4-dimethyl-9beta,19-cyclopropylsterol-4alpha-methyl oxidase activity	1	1	2.80568e-05	2.86878e-05	0.978003
4-alpha-glucanotransferase activity	1	1	2.80568e-05	2.86878e-05	0.978003
4-alpha-hydroxytetrahydrobiopterin dehydratase activity	1	1	2.80568e-05	2.86878e-05	0.978003
4-aminobutyrate transaminase activity	2	0	5.61136e-05	0	NA
4-hydroxy-3-methylbut-2-en-1-yl diphosphate reductase activity	2	2	5.61136e-05	5.73756e-05	0.978003
4-hydroxy-3-methylbut-2-en-1-yl diphosphate synthase activity	1	1	2.80568e-05	2.86878e-05	0.978003
4-hydroxyphenylacetaldehyde oxime monooxygenase activity	11	13	0.000308625	0.000372942	0.827541
4-hydroxyphenylpyruvate dioxygenase activity	1	1	2.80568e-05	2.86878e-05	0.978003
4-nitrophenylphosphatase activity	2	2	5.61136e-05	5.73756e-05	0.978003
5'-3' exonuclease activity	2	3	5.61136e-05	8.60635e-05	0.652002
5'-3' exoribonuclease activity	6	3	0.000168341	8.60635e-05	1.95601
5-amino-6-(5-phosphoribosylamino)uracil reductase activity	3	3	8.41704e-05	8.60635e-05	0.978003
5-formyltetrahydrofolate cyclo-ligase activity	3	3	8.41704e-05	8.60635e-05	0.978003
5-methyltetrahydropteroyltriglutamate-homocysteine S-methyltransferase activity	4	3	0.000112227	8.60635e-05	1.304
5'-nucleotidase activity	5	6	0.000140284	0.000172127	0.815003
5-oxoprolinase (ATP-hydrolyzing) activity	1	1	2.80568e-05	2.86878e-05	0.978003
5S rRNA binding	3	2	8.41704e-05	5.73756e-05	1.46701
6-phosphofructo-2-kinase activity	1	1	2.80568e-05	2.86878e-05	0.978003
6-phosphofructokinase activity	10	9	0.000280568	0.00025819	1.08667
6-phosphogluconolactonase activity	2	2	5.61136e-05	5.73756e-05	0.978003
7-dehydrocholesterol reductase activity	3	3	8.41704e-05	8.60635e-05	0.978003
7S RNA binding	7	6	0.000196398	0.000172127	1.141
8-amino-7-oxononanoate synthase activity	1	1	2.80568e-05	2.86878e-05	0.978003
acetate-CoA ligase activity	4	6	0.000112227	0.000172127	0.652002
acetolactate synthase activity	6	5	0.000168341	0.000143439	1.1736
acetyl-CoA C-acetyltransferase activity	2	2	5.61136e-05	5.73756e-05	0.978003
acetyl-CoA C-acyltransferase activity	2	3	5.61136e-05	8.60635e-05	0.652002
acetyl-CoA carboxylase activity	4	4	0.000112227	0.000114751	0.978003
acetylglucosaminyltransferase activity	8	8	0.000224454	0.000229503	0.978003
acetylglutamate kinase activity	1	1	2.80568e-05	2.86878e-05	0.978003
acid phosphatase activity	30	34	0.000841704	0.000975386	0.862944
acid-amino acid ligase activity	10	11	0.000280568	0.000315566	0.889094
acireductone synthase activity	3	2	8.41704e-05	5.73756e-05	1.46701
aconitate hydratase activity	4	2	0.000112227	5.73756e-05	1.95601
actin binding	49	44	0.00137478	0.00126226	1.08914
actin filament binding	2	2	5.61136e-05	5.73756e-05	0.978003
actin monomer binding	1	0	2.80568e-05	0	NA
acyl carrier activity	10	9	0.000280568	0.00025819	1.08667
acyl-[acyl-carrier-protein] desaturase activity	2	2	5.61136e-05	5.73756e-05	0.978003
acyl-[acyl-carrier-protein]-UDP-N-acetylglucosamine O-acyltransferase activity	1	0	2.80568e-05	0	NA
acyl-CoA binding	2	3	5.61136e-05	8.60635e-05	0.652002
acyl-CoA dehydrogenase activity	6	5	0.000168341	0.000143439	1.1736
acyl-CoA oxidase activity	4	3	0.000112227	8.60635e-05	1.304
acyl-CoA thioesterase activity	1	1	2.80568e-05	2.86878e-05	0.978003
acylglycerol lipase activity	2	2	5.61136e-05	5.73756e-05	0.978003
acylphosphatase activity	1	1	2.80568e-05	2.86878e-05	0.978003
acyltransferase activity	136	133	0.00381572	0.00381548	1.00006
adenine phosphoribosyltransferase activity	4	4	0.000112227	0.000114751	0.978003
adenosine deaminase activity	1	1	2.80568e-05	2.86878e-05	0.978003
adenosine kinase activity	3	3	8.41704e-05	8.60635e-05	0.978003
adenosylhomocysteinase activity	2	2	5.61136e-05	5.73756e-05	0.978003
adenosylmethionine decarboxylase activity	4	4	0.000112227	0.000114751	0.978003
adenylate cyclase activity	4	3	0.000112227	8.60635e-05	1.304
adenylate dimethylallyltransferase activity	1	1	2.80568e-05	2.86878e-05	0.978003
adenylate kinase activity	4	3	0.000112227	8.60635e-05	1.304
adenyl-nucleotide exchange factor activity	3	3	8.41704e-05	8.60635e-05	0.978003
adenylosuccinate synthase activity	1	1	2.80568e-05	2.86878e-05	0.978003
adenylylsulfate kinase activity	2	2	5.61136e-05	5.73756e-05	0.978003
adenylyl-sulfate reductase (glutathione) activity	1	1	2.80568e-05	2.86878e-05	0.978003
alanine-glyoxylate transaminase activity	3	3	8.41704e-05	8.60635e-05	0.978003
alanine-tRNA ligase activity	2	2	5.61136e-05	5.73756e-05	0.978003
alcohol dehydrogenase (NAD) activity	4	4	0.000112227	0.000114751	0.978003
aldehyde dehydrogenase (NAD) activity	6	8	0.000168341	0.000229503	0.733503
aldehyde dehydrogenase [NAD(P)+] activity	6	6	0.000168341	0.000172127	0.978003
aldehyde oxidase activity	2	2	5.61136e-05	5.73756e-05	0.978003
aldehyde reductase activity	5	3	0.000140284	8.60635e-05	1.63001
aldose 1-epimerase activity	3	3	8.41704e-05	8.60635e-05	0.978003
aldose-6-phosphate reductase (NADPH) activity	3	4	8.41704e-05	0.000114751	0.733503
alkylbase DNA N-glycosylase activity	2	2	5.61136e-05	5.73756e-05	0.978003
allantoate deiminase activity	2	2	5.61136e-05	5.73756e-05	0.978003
allantoinase activity	2	2	5.61136e-05	5.73756e-05	0.978003
allene-oxide cyclase activity	2	2	5.61136e-05	5.73756e-05	0.978003
alliin lyase activity	3	4	8.41704e-05	0.000114751	0.733503
all-trans-retinol 13,14-reductase activity	1	1	2.80568e-05	2.86878e-05	0.978003
alpha,alpha-trehalase activity	1	1	2.80568e-05	2.86878e-05	0.978003
alpha,alpha-trehalose-phosphate synthase (UDP-forming) activity	8	7	0.000224454	0.000200815	1.11772
alpha-1,3-mannosylglycoprotein 2-beta-N-acetylglucosaminyltransferase activity	2	2	5.61136e-05	5.73756e-05	0.978003
alpha-1,3-mannosyltransferase activity	1	0	2.80568e-05	0	NA
alpha-1,6-mannosylglycoprotein 2-beta-N-acetylglucosaminyltransferase activity	1	1	2.80568e-05	2.86878e-05	0.978003
alpha-amylase activity	6	5	0.000168341	0.000143439	1.1736
alpha-galactosidase activity	4	4	0.000112227	0.000114751	0.978003
alpha-glucosidase activity	6	4	0.000168341	0.000114751	1.46701
alpha-L-fucosidase activity	3	3	8.41704e-05	8.60635e-05	0.978003
alpha-mannosidase activity	7	3	0.000196398	8.60635e-05	2.28201
alpha-N-acetylglucosaminidase activity	2	1	5.61136e-05	2.86878e-05	1.95601
alpha-N-arabinofuranosidase activity	1	2	2.80568e-05	5.73756e-05	0.489002
amidase activity	9	8	0.000252511	0.000229503	1.10025
amidophosphoribosyltransferase activity	1	1	2.80568e-05	2.86878e-05	0.978003
amine oxidase activity	11	10	0.000308625	0.000286878	1.0758
amino acid binding	32	30	0.000897817	0.000860635	1.0432
amino acid transmembrane transporter activity	14	15	0.000392795	0.000430317	0.912803
aminoacylase activity	2	2	5.61136e-05	5.73756e-05	0.978003
aminoacyl-tRNA hydrolase activity	6	5	0.000168341	0.000143439	1.1736
aminoacyl-tRNA ligase activity	56	59	0.00157118	0.00169258	0.928274
aminomethyltransferase activity	4	4	0.000112227	0.000114751	0.978003
aminopeptidase activity	22	21	0.000617249	0.000602444	1.02458
ammonia ligase activity	15	14	0.000420852	0.000401629	1.04786
ammonia-lyase activity	15	14	0.000420852	0.000401629	1.04786
ammonium transmembrane transporter activity	9	8	0.000252511	0.000229503	1.10025
AMP binding	3	4	8.41704e-05	0.000114751	0.733503
AMP deaminase activity	1	1	2.80568e-05	2.86878e-05	0.978003
amygdalin beta-glucosidase activity	0	1	0	2.86878e-05	NA
anion channel activity	2	2	5.61136e-05	5.73756e-05	0.978003
anion exchanger activity	4	4	0.000112227	0.000114751	0.978003
anthocyanidin 3-O-glucosyltransferase activity	49	48	0.00137478	0.00137702	0.998379
anthocyanin 5-aromatic acyltransferase activity	4	7	0.000112227	0.000200815	0.558859
anthranilate N-benzoyltransferase activity	7	7	0.000196398	0.000200815	0.978003
anthranilate phosphoribosyltransferase activity	1	1	2.80568e-05	2.86878e-05	0.978003
anthranilate synthase activity	5	4	0.000140284	0.000114751	1.2225
antioxidant activity	8	8	0.000224454	0.000229503	0.978003
antiporter activity	54	51	0.00151507	0.00146308	1.03553
arabinose-5-phosphate isomerase activity	1	1	2.80568e-05	2.86878e-05	0.978003
ARF GTPase activator activity	15	19	0.000420852	0.000545069	0.772108
ARF guanyl-nucleotide exchange factor activity	6	5	0.000168341	0.000143439	1.1736
arginase activity	1	1	2.80568e-05	2.86878e-05	0.978003
arginine decarboxylase activity	3	3	8.41704e-05	8.60635e-05	0.978003
arginine transmembrane transporter activity	1	1	2.80568e-05	2.86878e-05	0.978003
arginine-tRNA ligase activity	1	1	2.80568e-05	2.86878e-05	0.978003
argininosuccinate lyase activity	2	2	5.61136e-05	5.73756e-05	0.978003
argininosuccinate synthase activity	4	3	0.000112227	8.60635e-05	1.304
arginyltransferase activity	1	1	2.80568e-05	2.86878e-05	0.978003
aromatase activity	9	12	0.000252511	0.000344254	0.733503
aromatic-L-amino-acid decarboxylase activity	2	2	5.61136e-05	5.73756e-05	0.978003
arsenite transmembrane-transporting ATPase activity	2	2	5.61136e-05	5.73756e-05	0.978003
aryl-alcohol dehydrogenase (NADP+) activity	1	1	2.80568e-05	2.86878e-05	0.978003
asparaginase activity	2	3	5.61136e-05	8.60635e-05	0.652002
asparagine synthase (glutamine-hydrolyzing) activity	4	3	0.000112227	8.60635e-05	1.304
asparagine-tRNA ligase activity	3	3	8.41704e-05	8.60635e-05	0.978003
aspartate carbamoyltransferase activity	1	1	2.80568e-05	2.86878e-05	0.978003
aspartate kinase activity	4	3	0.000112227	8.60635e-05	1.304
aspartate-semialdehyde dehydrogenase activity	2	2	5.61136e-05	5.73756e-05	0.978003
aspartate-tRNA ligase activity	4	4	0.000112227	0.000114751	0.978003
aspartic-type endopeptidase activity	95	93	0.00266539	0.00266797	0.999036
aspartyl esterase activity	46	49	0.00129061	0.0014057	0.918126
ATP binding	1816	1761	0.0509511	0.0505192	1.00855
ATP citrate synthase activity	4	3	0.000112227	8.60635e-05	1.304
ATP phosphoribosyltransferase activity	1	1	2.80568e-05	2.86878e-05	0.978003
ATP:ADP antiporter activity	1	1	2.80568e-05	2.86878e-05	0.978003
ATPase activator activity	1	3	2.80568e-05	8.60635e-05	0.326001
ATPase activity	140	120	0.00392795	0.00344254	1.141
ATPase activity, coupled to transmembrane movement of ions, phosphorylative mechanism	48	47	0.00134673	0.00134833	0.998812
ATPase activity, coupled to transmembrane movement of substances	62	43	0.00173952	0.00123358	1.41014
ATPase activity, uncoupled	1	1	2.80568e-05	2.86878e-05	0.978003
ATP-dependent 3'-5' DNA helicase activity	3	2	8.41704e-05	5.73756e-05	1.46701
ATP-dependent DNA helicase activity	9	11	0.000252511	0.000315566	0.800185
ATP-dependent helicase activity	89	81	0.00249705	0.00232371	1.0746
ATP-dependent peptidase activity	11	12	0.000308625	0.000344254	0.896503
beta-1,4-mannosylglycoprotein 4-beta-N-acetylglucosaminyltransferase activity	3	3	8.41704e-05	8.60635e-05	0.978003
beta-amylase activity	12	10	0.000336681	0.000286878	1.1736
beta-fructofuranosidase activity	5	4	0.000140284	0.000114751	1.2225
beta-galactosidase activity	27	32	0.000757533	0.00091801	0.82519
beta-galactoside alpha-2,3-sialyltransferase activity	1	1	2.80568e-05	2.86878e-05	0.978003
beta-glucosidase activity	24	21	0.000673363	0.000602444	1.11772
betaine-aldehyde dehydrogenase activity	1	1	2.80568e-05	2.86878e-05	0.978003
beta-N-acetylhexosaminidase activity	3	3	8.41704e-05	8.60635e-05	0.978003
beta-phosphoglucomutase activity	2	2	5.61136e-05	5.73756e-05	0.978003
beta-pyrazolylalanine synthase activity	0	1	0	2.86878e-05	NA
beta-ureidopropionase activity	1	1	2.80568e-05	2.86878e-05	0.978003
bile acid:sodium symporter activity	6	6	0.000168341	0.000172127	0.978003
bilirubin oxidase activity	1	1	2.80568e-05	2.86878e-05	0.978003
binding	861	848	0.0241569	0.0243273	0.992996
biotin binding	7	6	0.000196398	0.000172127	1.141
biotin synthase activity	1	1	2.80568e-05	2.86878e-05	0.978003
biotin-[acetyl-CoA-carboxylase] ligase activity	1	1	2.80568e-05	2.86878e-05	0.978003
bis(5'-adenosyl)-pentaphosphatase activity	1	1	2.80568e-05	2.86878e-05	0.978003
bis(5'-nucleosyl)-tetraphosphatase (asymmetrical) activity	2	2	5.61136e-05	5.73756e-05	0.978003
branched-chain-amino-acid transaminase activity	2	1	5.61136e-05	2.86878e-05	1.95601
C-4 methylsterol oxidase activity	4	4	0.000112227	0.000114751	0.978003
CAAX-protein geranylgeranyltransferase activity	1	1	2.80568e-05	2.86878e-05	0.978003
cadmium ion binding	0	1	0	2.86878e-05	NA
cadmium-exporting ATPase activity	0	1	0	2.86878e-05	NA
caffeate O-methyltransferase activity	2	3	5.61136e-05	8.60635e-05	0.652002
caffeoyl-CoA O-methyltransferase activity	1	1	2.80568e-05	2.86878e-05	0.978003
calcium channel activity	0	1	0	2.86878e-05	NA
calcium ion binding	230	233	0.00645306	0.00668426	0.965411
calcium ion transmembrane transporter activity	9	8	0.000252511	0.000229503	1.10025
calcium-dependent cysteine-type endopeptidase activity	1	3	2.80568e-05	8.60635e-05	0.326001
calcium-dependent phospholipid binding	8	9	0.000224454	0.00025819	0.869336
calcium-transporting ATPase activity	17	17	0.000476965	0.000487693	0.978003
calmodulin binding	32	33	0.000897817	0.000946698	0.948367
calmodulin-dependent protein kinase activity	32	32	0.000897817	0.00091801	0.978003
cAMP binding	11	11	0.000308625	0.000315566	0.978003
cAMP-dependent protein kinase regulator activity	2	1	5.61136e-05	2.86878e-05	1.95601
capsanthin/capsorubin synthase activity	0	1	0	2.86878e-05	NA
carbamoyl-phosphate synthase (ammonia) activity	1	1	2.80568e-05	2.86878e-05	0.978003
carbamoyl-phosphate synthase activity	3	2	8.41704e-05	5.73756e-05	1.46701
carbohydrate binding	36	32	0.00101004	0.00091801	1.10025
carbonate dehydratase activity	11	13	0.000308625	0.000372942	0.827541
carbon-carbon lyase activity	1	1	2.80568e-05	2.86878e-05	0.978003
carbon-nitrogen ligase activity, with glutamine as amido-N-donor	13	13	0.000364738	0.000372942	0.978003
carbon-sulfur lyase activity	5	6	0.000140284	0.000172127	0.815003
carbonyl reductase (NADPH) activity	1	2	2.80568e-05	5.73756e-05	0.489002
carboxyl- or carbamoyltransferase activity	2	2	5.61136e-05	5.73756e-05	0.978003
carboxylesterase activity	18	20	0.000505022	0.000573756	0.880203
carboxy-lyase activity	20	19	0.000561136	0.000545069	1.02948
carboxymethylenebutenolidase activity	1	1	2.80568e-05	2.86878e-05	0.978003
carboxypeptidase activity	40	39	0.00112227	0.00111882	1.00308
cardiolipin synthase activity	1	1	2.80568e-05	2.86878e-05	0.978003
carotene 7,8-desaturase activity	3	3	8.41704e-05	8.60635e-05	0.978003
catalase activity	1	1	2.80568e-05	2.86878e-05	0.978003
catalytic activity	1297	1255	0.0363897	0.0360032	1.01073
catechol oxidase activity	6	4	0.000168341	0.000114751	1.46701
cation binding	167	164	0.00468548	0.0047048	0.995894
cation transmembrane transporter activity	14	16	0.000392795	0.000459005	0.855753
cation:chloride symporter activity	2	1	5.61136e-05	2.86878e-05	1.95601
CDP-diacylglycerol-glycerol-3-phosphate 3-phosphatidyltransferase activity	1	1	2.80568e-05	2.86878e-05	0.978003
CDP-diacylglycerol-inositol 3-phosphatidyltransferase activity	0	1	0	2.86878e-05	NA
cellulase activity	10	10	0.000280568	0.000286878	0.978003
cellulose synthase (UDP-forming) activity	41	40	0.00115033	0.00114751	1.00245
ceramide kinase activity	2	1	5.61136e-05	2.86878e-05	1.95601
cGMP binding	10	10	0.000280568	0.000286878	0.978003
cGMP-dependent protein kinase activity	2	2	5.61136e-05	5.73756e-05	0.978003
chalcone isomerase activity	2	2	5.61136e-05	5.73756e-05	0.978003
chaperone binding	4	6	0.000112227	0.000172127	0.652002
chitin binding	4	5	0.000112227	0.000143439	0.782403
chitinase activity	17	16	0.000476965	0.000459005	1.03913
chitobiosyldiphosphodolichol beta-mannosyltransferase activity	0	1	0	2.86878e-05	NA
chlorophyll binding	3	3	8.41704e-05	8.60635e-05	0.978003
chlorophyll synthase activity	1	1	2.80568e-05	2.86878e-05	0.978003
chlorophyllase activity	2	1	5.61136e-05	2.86878e-05	1.95601
chlorophyllide a oxygenase activity	9	7	0.000252511	0.000200815	1.25743
cholestenol delta-isomerase activity	1	1	2.80568e-05	2.86878e-05	0.978003
choline kinase activity	0	1	0	2.86878e-05	NA
choline monooxygenase activity	1	1	2.80568e-05	2.86878e-05	0.978003
choline-phosphate cytidylyltransferase activity	1	1	2.80568e-05	2.86878e-05	0.978003
chorismate mutase activity	3	3	8.41704e-05	8.60635e-05	0.978003
chorismate synthase activity	1	1	2.80568e-05	2.86878e-05	0.978003
chromatin binding	21	31	0.000589193	0.000889322	0.662518
cinnamoyl-CoA reductase activity	0	2	0	5.73756e-05	NA
citrate (Si)-synthase activity	0	1	0	2.86878e-05	NA
citrate transmembrane transporter activity	3	3	8.41704e-05	8.60635e-05	0.978003
clathrin binding	9	10	0.000252511	0.000286878	0.880203
CoA pyrophosphatase activity	1	1	2.80568e-05	2.86878e-05	0.978003
cobalt ion binding	4	5	0.000112227	0.000143439	0.782403
cobalt ion transmembrane transporter activity	1	1	2.80568e-05	2.86878e-05	0.978003
coenzyme binding	74	72	0.0020762	0.00206552	1.00517
coenzyme F420 hydrogenase activity	1	0	2.80568e-05	0	NA
cofactor binding	27	24	0.000757533	0.000688508	1.10025
coniferyl-alcohol glucosyltransferase activity	1	1	2.80568e-05	2.86878e-05	0.978003
copper ion binding	108	92	0.00303013	0.00263928	1.14809
copper ion transmembrane transporter activity	6	6	0.000168341	0.000172127	0.978003
copper-exporting ATPase activity	11	11	0.000308625	0.000315566	0.978003
coproporphyrinogen dehydrogenase activity	1	1	2.80568e-05	2.86878e-05	0.978003
coproporphyrinogen oxidase activity	1	1	2.80568e-05	2.86878e-05	0.978003
CTP synthase activity	4	4	0.000112227	0.000114751	0.978003
cyanate hydratase activity	1	1	2.80568e-05	2.86878e-05	0.978003
cyclic-nucleotide phosphodiesterase activity	1	0	2.80568e-05	0	NA
cyclin-dependent protein kinase activity	8	13	0.000224454	0.000372942	0.601848
cyclin-dependent protein kinase inhibitor activity	3	5	8.41704e-05	0.000143439	0.586802
cyclin-dependent protein kinase regulator activity	1	0	2.80568e-05	0	NA
cycloartenol synthase activity	3	0	8.41704e-05	0	NA
cyclopentanol dehydrogenase activity	1	1	2.80568e-05	2.86878e-05	0.978003
cyclopropane-fatty-acyl-phospholipid synthase activity	7	8	0.000196398	0.000229503	0.855753
cystathionine gamma-lyase activity	1	1	2.80568e-05	2.86878e-05	0.978003
cystathionine gamma-synthase activity	2	2	5.61136e-05	5.73756e-05	0.978003
cysteamine dioxygenase activity	2	2	5.61136e-05	5.73756e-05	0.978003
cysteine desulfurase activity	4	5	0.000112227	0.000143439	0.782403
cysteine synthase activity	5	5	0.000140284	0.000143439	0.978003
cysteine-tRNA ligase activity	2	2	5.61136e-05	5.73756e-05	0.978003
cysteine-type endopeptidase activity	28	30	0.00078559	0.000860635	0.912803
cysteine-type endopeptidase inhibitor activity	15	8	0.000420852	0.000229503	1.83376
cysteine-type peptidase activity	51	62	0.0014309	0.00177864	0.804487
cytidine deaminase activity	0	1	0	2.86878e-05	NA
cytochrome-b5 reductase activity	4	4	0.000112227	0.000114751	0.978003
cytochrome-c oxidase activity	8	10	0.000224454	0.000286878	0.782403
cytokinin dehydrogenase activity	8	8	0.000224454	0.000229503	0.978003
cytoskeletal protein binding	1	1	2.80568e-05	2.86878e-05	0.978003
D-alanine:2-oxoglutarate aminotransferase activity	1	1	2.80568e-05	2.86878e-05	0.978003
D-alanine-D-alanine ligase activity	1	1	2.80568e-05	2.86878e-05	0.978003
damaged DNA binding	22	18	0.000617249	0.000516381	1.19534
D-amino-acid dehydrogenase activity	1	1	2.80568e-05	2.86878e-05	0.978003
D-aminoacyl-tRNA deacylase activity	0	1	0	2.86878e-05	NA
D-arabinono-1,4-lactone oxidase activity	3	3	8.41704e-05	8.60635e-05	0.978003
dCMP deaminase activity	1	1	2.80568e-05	2.86878e-05	0.978003
deaminase activity	2	2	5.61136e-05	5.73756e-05	0.978003
dehydrodolichyl diphosphate synthase activity	0	1	0	2.86878e-05	NA
delta3,5-delta2,4-dienoyl-CoA isomerase activity	1	1	2.80568e-05	2.86878e-05	0.978003
deoxycytidine kinase activity	1	1	2.80568e-05	2.86878e-05	0.978003
deoxyhypusine synthase activity	1	0	2.80568e-05	0	NA
deoxyribodipyrimidine photo-lyase activity	5	5	0.000140284	0.000143439	0.978003
dephospho-CoA kinase activity	1	1	2.80568e-05	2.86878e-05	0.978003
desacetoxyvindoline 4-hydroxylase activity	2	1	5.61136e-05	2.86878e-05	1.95601
diacylglycerol cholinephosphotransferase activity	1	2	2.80568e-05	5.73756e-05	0.489002
diacylglycerol kinase activity	11	9	0.000308625	0.00025819	1.19534
diaminohydroxyphosphoribosylaminopyrimidine deaminase activity	3	3	8.41704e-05	8.60635e-05	0.978003
diaminopimelate decarboxylase activity	1	1	2.80568e-05	2.86878e-05	0.978003
diaminopimelate epimerase activity	2	1	5.61136e-05	2.86878e-05	1.95601
dihydrodipicolinate reductase activity	3	2	8.41704e-05	5.73756e-05	1.46701
dihydrodipicolinate synthase activity	1	1	2.80568e-05	2.86878e-05	0.978003
dihydrofolate reductase activity	1	1	2.80568e-05	2.86878e-05	0.978003
dihydrokaempferol 4-reductase activity	13	15	0.000364738	0.000430317	0.847603
dihydrolipoyl dehydrogenase activity	3	3	8.41704e-05	8.60635e-05	0.978003
dihydrolipoyllysine-residue (2-methylpropanoyl)transferase activity	2	2	5.61136e-05	5.73756e-05	0.978003
dihydrolipoyllysine-residue acetyltransferase activity	2	2	5.61136e-05	5.73756e-05	0.978003
dihydrolipoyllysine-residue succinyltransferase activity	2	2	5.61136e-05	5.73756e-05	0.978003
dihydroneopterin aldolase activity	1	1	2.80568e-05	2.86878e-05	0.978003
dihydroneopterin triphosphate pyrophosphohydrolase activity	2	1	5.61136e-05	2.86878e-05	1.95601
dihydroorotase activity	1	1	2.80568e-05	2.86878e-05	0.978003
dihydroorotate dehydrogenase activity	4	4	0.000112227	0.000114751	0.978003
dihydroorotate oxidase activity	4	4	0.000112227	0.000114751	0.978003
dihydropteroate synthase activity	1	1	2.80568e-05	2.86878e-05	0.978003
dihydropyrimidinase activity	1	1	2.80568e-05	2.86878e-05	0.978003
dihydroxy-acid dehydratase activity	1	1	2.80568e-05	2.86878e-05	0.978003
dimethylallyltranstransferase activity	1	1	2.80568e-05	2.86878e-05	0.978003
dioxygenase activity	3	3	8.41704e-05	8.60635e-05	0.978003
dipeptidase activity	2	1	5.61136e-05	2.86878e-05	1.95601
dipeptide transporter activity	1	1	2.80568e-05	2.86878e-05	0.978003
diphosphate-fructose-6-phosphate 1-phosphotransferase activity	5	4	0.000140284	0.000114751	1.2225
diphosphoinositol-polyphosphate diphosphatase activity	1	1	2.80568e-05	2.86878e-05	0.978003
diphosphomevalonate decarboxylase activity	1	1	2.80568e-05	2.86878e-05	0.978003
diphthine synthase activity	1	1	2.80568e-05	2.86878e-05	0.978003
di-trans,poly-cis-decaprenylcistransferase activity	1	1	2.80568e-05	2.86878e-05	0.978003
D-lactate dehydrogenase (cytochrome) activity	1	1	2.80568e-05	2.86878e-05	0.978003
DNA (cytosine-5-)-methyltransferase activity	5	4	0.000140284	0.000114751	1.2225
DNA binding	1373	1413	0.038522	0.0405359	0.950318
DNA clamp loader activity	6	6	0.000168341	0.000172127	0.978003
DNA helicase activity	6	10	0.000168341	0.000286878	0.586802
DNA ligase (ATP) activity	3	4	8.41704e-05	0.000114751	0.733503
DNA photolyase activity	7	7	0.000196398	0.000200815	0.978003
DNA primase activity	2	2	5.61136e-05	5.73756e-05	0.978003
DNA topoisomerase (ATP-hydrolyzing) activity	5	5	0.000140284	0.000143439	0.978003
DNA topoisomerase activity	8	10	0.000224454	0.000286878	0.782403
DNA topoisomerase type I activity	6	8	0.000168341	0.000229503	0.733503
DNA-(apurinic or apyrimidinic site) lyase activity	5	5	0.000140284	0.000143439	0.978003
DNA-3-methyladenine glycosylase I activity	4	4	0.000112227	0.000114751	0.978003
DNA-dependent ATPase activity	11	9	0.000308625	0.00025819	1.19534
DNA-directed DNA polymerase activity	37	33	0.0010381	0.000946698	1.09655
DNA-directed RNA polymerase activity	43	42	0.00120644	0.00120489	1.00129
dolichol kinase activity	1	1	2.80568e-05	2.86878e-05	0.978003
dolichyl-diphosphooligosaccharide-protein glycotransferase activity	8	9	0.000224454	0.00025819	0.869336
dolichyl-phosphate beta-D-mannosyltransferase activity	1	0	2.80568e-05	0	NA
dolichyl-phosphate beta-glucosyltransferase activity	2	2	5.61136e-05	5.73756e-05	0.978003
dolichyl-phosphate-mannose-protein mannosyltransferase activity	1	1	2.80568e-05	2.86878e-05	0.978003
dopamine beta-monooxygenase activity	2	2	5.61136e-05	5.73756e-05	0.978003
double-stranded DNA binding	1	1	2.80568e-05	2.86878e-05	0.978003
double-stranded methylated DNA binding	0	1	0	2.86878e-05	NA
double-stranded RNA binding	18	16	0.000505022	0.000459005	1.10025
drug transporter activity	46	44	0.00129061	0.00126226	1.02246
dTDP-4-dehydrorhamnose reductase activity	1	1	2.80568e-05	2.86878e-05	0.978003
electron carrier activity	371	363	0.0104091	0.0104137	0.999557
electron transporter, transferring electrons within the cyclic electron transport pathway of photosynthesis activity	1	0	2.80568e-05	0	NA
endo-1,3(4)-beta-glucanase activity	4	4	0.000112227	0.000114751	0.978003
endo-1,4-beta-xylanase activity	1	2	2.80568e-05	5.73756e-05	0.489002
endodeoxyribonuclease activity, producing 5'-phosphomonoesters	2	2	5.61136e-05	5.73756e-05	0.978003
endonuclease activity	37	38	0.0010381	0.00109014	0.952267
endopeptidase activity	13	15	0.000364738	0.000430317	0.847603
endopeptidase inhibitor activity	2	4	5.61136e-05	0.000114751	0.489002
endoplasmic reticulum signal peptide binding	1	1	2.80568e-05	2.86878e-05	0.978003
endoribonuclease activity	1	1	2.80568e-05	2.86878e-05	0.978003
endoribonuclease activity, producing 5'-phosphomonoesters	1	1	2.80568e-05	2.86878e-05	0.978003
enoyl-[acyl-carrier-protein] reductase (NADH) activity	2	2	5.61136e-05	5.73756e-05	0.978003
enoyl-CoA hydratase activity	4	5	0.000112227	0.000143439	0.782403
enzyme activator activity	2	1	5.61136e-05	2.86878e-05	1.95601
enzyme inhibitor activity	59	54	0.00165535	0.00154914	1.06856
enzyme regulator activity	5	4	0.000140284	0.000114751	1.2225
ER retention sequence binding	7	6	0.000196398	0.000172127	1.141
estradiol 17-beta-dehydrogenase activity	2	2	5.61136e-05	5.73756e-05	0.978003
ethanolamine kinase activity	2	2	5.61136e-05	5.73756e-05	0.978003
ethanolamine-phosphate cytidylyltransferase activity	1	1	2.80568e-05	2.86878e-05	0.978003
exodeoxyribonuclease III activity	2	2	5.61136e-05	5.73756e-05	0.978003
exonuclease activity	39	38	0.00109421	0.00109014	1.00374
exoribonuclease II activity	7	7	0.000196398	0.000200815	0.978003
extracellular-glutamate-gated ion channel activity	31	28	0.00086976	0.000803259	1.08279
FAD binding	123	115	0.00345098	0.0032991	1.04604
farnesyl-diphosphate farnesyltransferase activity	1	1	2.80568e-05	2.86878e-05	0.978003
ferredoxin-NADP+ reductase activity	2	2	5.61136e-05	5.73756e-05	0.978003
ferredoxin-nitrite reductase activity	1	1	2.80568e-05	2.86878e-05	0.978003
ferric-transporting ATPase activity	8	6	0.000224454	0.000172127	1.304
ferrochelatase activity	2	2	5.61136e-05	5.73756e-05	0.978003
ferrous iron binding	1	1	2.80568e-05	2.86878e-05	0.978003
flavin-containing monooxygenase activity	15	18	0.000420852	0.000516381	0.815003
flavonoid 3',5'-hydroxylase activity	19	19	0.000533079	0.000545069	0.978003
flavonol synthase activity	19	15	0.000533079	0.000430317	1.2388
FMN adenylyltransferase activity	1	1	2.80568e-05	2.86878e-05	0.978003
FMN binding	27	25	0.000757533	0.000717195	1.05624
folic acid binding	2	2	5.61136e-05	5.73756e-05	0.978003
formate dehydrogenase activity	2	1	5.61136e-05	2.86878e-05	1.95601
formate-tetrahydrofolate ligase activity	1	1	2.80568e-05	2.86878e-05	0.978003
formylmethionine deformylase activity	1	0	2.80568e-05	0	NA
formyltetrahydrofolate deformylase activity	0	1	0	2.86878e-05	NA
fructokinase activity	3	3	8.41704e-05	8.60635e-05	0.978003
fructose 1,6-bisphosphate 1-phosphatase activity	2	3	5.61136e-05	8.60635e-05	0.652002
fructose-bisphosphate aldolase activity	6	6	0.000168341	0.000172127	0.978003
fucosyltransferase activity	6	5	0.000168341	0.000143439	1.1736
fumarate hydratase activity	1	1	2.80568e-05	2.86878e-05	0.978003
fumarylacetoacetase activity	1	1	2.80568e-05	2.86878e-05	0.978003
GABA-B receptor activity	7	6	0.000196398	0.000172127	1.141
galactinol-raffinose galactosyltransferase activity	2	2	5.61136e-05	5.73756e-05	0.978003
galactokinase activity	5	5	0.000140284	0.000143439	0.978003
galactonolactone dehydrogenase activity	2	2	5.61136e-05	5.73756e-05	0.978003
galactose oxidase activity	5	4	0.000140284	0.000114751	1.2225
galactoside 2-alpha-L-fucosyltransferase activity	1	1	2.80568e-05	2.86878e-05	0.978003
galactosylgalactosylxylosylprotein 3-beta-glucuronosyltransferase activity	4	4	0.000112227	0.000114751	0.978003
galactosyltransferase activity	25	24	0.00070142	0.000688508	1.01875
galactosylxylosylprotein 3-beta-galactosyltransferase activity	14	12	0.000392795	0.000344254	1.141
galacturan 1,4-alpha-galacturonidase activity	23	15	0.000645306	0.000430317	1.49961
gamma-glutamyl-peptidase activity	2	3	5.61136e-05	8.60635e-05	0.652002
gamma-glutamyltransferase activity	3	2	8.41704e-05	5.73756e-05	1.46701
GDP-L-fucose synthase activity	1	1	2.80568e-05	2.86878e-05	0.978003
GDP-mannose 3,5-epimerase activity	1	1	2.80568e-05	2.86878e-05	0.978003
GDP-mannose 4,6-dehydratase activity	1	1	2.80568e-05	2.86878e-05	0.978003
GDP-mannose transmembrane transporter activity	1	1	2.80568e-05	2.86878e-05	0.978003
general RNA polymerase II transcription factor activity	3	2	8.41704e-05	5.73756e-05	1.46701
geranylgeranyl reductase activity	2	2	5.61136e-05	5.73756e-05	0.978003
gibberellin 3-beta-dioxygenase activity	7	7	0.000196398	0.000200815	0.978003
glucan 1,3-alpha-glucosidase activity	1	1	2.80568e-05	2.86878e-05	0.978003
glucan 1,4-alpha-maltotetraohydrolase activity	4	3	0.000112227	8.60635e-05	1.304
glucan endo-1,3-beta-D-glucosidase activity	26	26	0.000729476	0.000745883	0.978003
glucomannan 4-beta-mannosyltransferase activity	3	3	8.41704e-05	8.60635e-05	0.978003
gluconokinase activity	0	1	0	2.86878e-05	NA
glucose 1-dehydrogenase activity	1	1	2.80568e-05	2.86878e-05	0.978003
glucose-1-phosphate adenylyltransferase activity	5	6	0.000140284	0.000172127	0.815003
glucose-6-phosphate dehydrogenase activity	3	3	8.41704e-05	8.60635e-05	0.978003
glucose-6-phosphate isomerase activity	2	2	5.61136e-05	5.73756e-05	0.978003
glucosidase activity	1	0	2.80568e-05	0	NA
glucosylceramidase activity	2	2	5.61136e-05	5.73756e-05	0.978003
glucosyltransferase activity	0	1	0	2.86878e-05	NA
glucuronosyl-N-acetylglucosaminyl-proteoglycan 4-alpha-N-acetylglucosaminyltransferase activity	5	5	0.000140284	0.000143439	0.978003
glucuronoxylan glucuronosyltransferase activity	1	0	2.80568e-05	0	NA
glucuronyl-galactosyl-proteoglycan 4-alpha-N-acetylglucosaminyltransferase activity	3	3	8.41704e-05	8.60635e-05	0.978003
glutamate 5-kinase activity	2	3	5.61136e-05	8.60635e-05	0.652002
glutamate decarboxylase activity	5	5	0.000140284	0.000143439	0.978003
glutamate dehydrogenase (NADP+) activity	1	1	2.80568e-05	2.86878e-05	0.978003
glutamate dehydrogenase [NAD(P)+] activity	3	3	8.41704e-05	8.60635e-05	0.978003
glutamate N-acetyltransferase activity	1	0	2.80568e-05	0	NA
glutamate synthase (ferredoxin) activity	2	2	5.61136e-05	5.73756e-05	0.978003
glutamate synthase activity	3	2	8.41704e-05	5.73756e-05	1.46701
glutamate-1-semialdehyde 2,1-aminomutase activity	1	1	2.80568e-05	2.86878e-05	0.978003
glutamate-5-semialdehyde dehydrogenase activity	1	2	2.80568e-05	5.73756e-05	0.489002
glutamate-ammonia ligase activity	5	2	0.000140284	5.73756e-05	2.44501
glutamate-cysteine ligase activity	1	0	2.80568e-05	0	NA
glutamate-tRNA ligase activity	2	2	5.61136e-05	5.73756e-05	0.978003
glutamine-fructose-6-phosphate transaminase (isomerizing) activity	1	1	2.80568e-05	2.86878e-05	0.978003
glutamine-tRNA ligase activity	1	1	2.80568e-05	2.86878e-05	0.978003
glutaminyl-peptide cyclotransferase activity	1	1	2.80568e-05	2.86878e-05	0.978003
glutaminyl-tRNA synthase (glutamine-hydrolyzing) activity	3	2	8.41704e-05	5.73756e-05	1.46701
glutathione gamma-glutamylcysteinyltransferase activity	2	2	5.61136e-05	5.73756e-05	0.978003
glutathione peroxidase activity	6	6	0.000168341	0.000172127	0.978003
glutathione synthase activity	1	2	2.80568e-05	5.73756e-05	0.489002
glutathione transferase activity	7	9	0.000196398	0.00025819	0.760669
glutathione-disulfide reductase activity	2	2	5.61136e-05	5.73756e-05	0.978003
glyceraldehyde-3-phosphate dehydrogenase (NADP+) (phosphorylating) activity	1	1	2.80568e-05	2.86878e-05	0.978003
glyceraldehyde-3-phosphate dehydrogenase (phosphorylating) activity	6	6	0.000168341	0.000172127	0.978003
glyceraldehyde-3-phosphate dehydrogenase activity	6	6	0.000168341	0.000172127	0.978003
glycerate dehydrogenase activity	2	1	5.61136e-05	2.86878e-05	1.95601
glycerate kinase activity	1	1	2.80568e-05	2.86878e-05	0.978003
glycerol kinase activity	1	1	2.80568e-05	2.86878e-05	0.978003
glycerol-3-phosphate dehydrogenase (NAD+) activity	4	6	0.000112227	0.000172127	0.652002
glycerol-3-phosphate dehydrogenase [NAD(P)+] activity	3	4	8.41704e-05	0.000114751	0.733503
glycerol-3-phosphate dehydrogenase activity	1	1	2.80568e-05	2.86878e-05	0.978003
glycerol-3-phosphate O-acyltransferase activity	5	5	0.000140284	0.000143439	0.978003
glycerol-3-phosphate oxidase activity	1	1	2.80568e-05	2.86878e-05	0.978003
glycerone kinase activity	3	3	8.41704e-05	8.60635e-05	0.978003
glycerophosphodiester phosphodiesterase activity	6	6	0.000168341	0.000172127	0.978003
glycine dehydrogenase (decarboxylating) activity	1	1	2.80568e-05	2.86878e-05	0.978003
glycine hydroxymethyltransferase activity	6	5	0.000168341	0.000143439	1.1736
glycine-tRNA ligase activity	4	4	0.000112227	0.000114751	0.978003
glycogenin glucosyltransferase activity	9	8	0.000252511	0.000229503	1.10025
glycolipid binding	3	3	8.41704e-05	8.60635e-05	0.978003
glycolipid transporter activity	3	3	8.41704e-05	8.60635e-05	0.978003
glycoprotein 2-beta-D-xylosyltransferase activity	1	1	2.80568e-05	2.86878e-05	0.978003
glycoprotein 3-alpha-L-fucosyltransferase activity	1	1	2.80568e-05	2.86878e-05	0.978003
glycylpeptide N-tetradecanoyltransferase activity	1	1	2.80568e-05	2.86878e-05	0.978003
glyoxylate reductase activity	5	6	0.000140284	0.000172127	0.815003
GMP synthase (glutamine-hydrolyzing) activity	1	1	2.80568e-05	2.86878e-05	0.978003
G-protein coupled photoreceptor activity	3	3	8.41704e-05	8.60635e-05	0.978003
G-protein coupled receptor activity	4	4	0.000112227	0.000114751	0.978003
G-protein coupled receptor kinase activity	6	6	0.000168341	0.000172127	0.978003
GTP binding	186	179	0.00521856	0.00513512	1.01625
GTP cyclohydrolase I activity	1	2	2.80568e-05	5.73756e-05	0.489002
GTP cyclohydrolase II activity	4	3	0.000112227	8.60635e-05	1.304
GTP diphosphokinase activity	3	3	8.41704e-05	8.60635e-05	0.978003
GTPase activating protein binding	1	0	2.80568e-05	0	NA
GTPase activator activity	2	2	5.61136e-05	5.73756e-05	0.978003
GTPase activity	70	64	0.00196398	0.00183602	1.06969
GTPase binding	3	1	8.41704e-05	2.86878e-05	2.93401
GTP-dependent protein binding	3	3	8.41704e-05	8.60635e-05	0.978003
guanine deaminase activity	1	1	2.80568e-05	2.86878e-05	0.978003
guanosine-3',5'-bis(diphosphate) 3'-diphosphatase activity	1	1	2.80568e-05	2.86878e-05	0.978003
guanyl nucleotide binding	5	6	0.000140284	0.000172127	0.815003
guanylate kinase activity	4	4	0.000112227	0.000114751	0.978003
guanyl-nucleotide exchange factor activity	3	1	8.41704e-05	2.86878e-05	2.93401
haloalkane dehalogenase activity	1	1	2.80568e-05	2.86878e-05	0.978003
heat shock protein binding	95	85	0.00266539	0.00243846	1.09306
hedgehog receptor activity	4	7	0.000112227	0.000200815	0.558859
helicase activity	152	146	0.00426463	0.00418842	1.0182
heme binding	307	315	0.00861343	0.00903666	0.953165
heme oxygenase (decyclizing) activity	2	2	5.61136e-05	5.73756e-05	0.978003
heme transporter activity	2	1	5.61136e-05	2.86878e-05	1.95601
hexokinase activity	6	6	0.000168341	0.000172127	0.978003
hexose:hydrogen symporter activity	1	0	2.80568e-05	0	NA
high-affinity hydrogen:glucose symporter activity	1	0	2.80568e-05	0	NA
hippurate hydrolase activity	1	1	2.80568e-05	2.86878e-05	0.978003
histidine-tRNA ligase activity	2	2	5.61136e-05	5.73756e-05	0.978003
histidinol dehydrogenase activity	1	1	2.80568e-05	2.86878e-05	0.978003
histidinol-phosphate transaminase activity	1	2	2.80568e-05	5.73756e-05	0.489002
histone acetyltransferase activity	30	29	0.000841704	0.000831947	1.01173
histone binding	0	1	0	2.86878e-05	NA
histone deacetylase activity	6	4	0.000168341	0.000114751	1.46701
histone-arginine N-methyltransferase activity	7	7	0.000196398	0.000200815	0.978003
histone-lysine N-methyltransferase activity	30	25	0.000841704	0.000717195	1.1736
holo-[acyl-carrier-protein] synthase activity	1	2	2.80568e-05	5.73756e-05	0.489002
homocysteine S-methyltransferase activity	3	3	8.41704e-05	8.60635e-05	0.978003
homogentisate 1,2-dioxygenase activity	1	1	2.80568e-05	2.86878e-05	0.978003
homoserine dehydrogenase activity	3	3	8.41704e-05	8.60635e-05	0.978003
homoserine kinase activity	1	1	2.80568e-05	2.86878e-05	0.978003
homospermidine synthase (spermidine-specific) activity	1	1	2.80568e-05	2.86878e-05	0.978003
hormone activity	1	1	2.80568e-05	2.86878e-05	0.978003
hydrogen ion transmembrane transporter activity	15	13	0.000420852	0.000372942	1.12847
hydrogen ion transporting ATP synthase activity, rotational mechanism	16	11	0.000448909	0.000315566	1.42255
hydrogen-exporting ATPase activity, phosphorylative mechanism	2	2	5.61136e-05	5.73756e-05	0.978003
hydrogen-translocating pyrophosphatase activity	3	2	8.41704e-05	5.73756e-05	1.46701
hydrolase activity	1490	1421	0.0418046	0.0407654	1.02549
hydrolase activity, acting on acid anhydrides, catalyzing transmembrane movement of substances	57	53	0.00159924	0.00152045	1.05182
hydrolase activity, acting on acid anhydrides, in phosphorus-containing anhydrides	28	28	0.00078559	0.000803259	0.978003
hydrolase activity, acting on carbon-nitrogen (but not peptide) bonds	11	10	0.000308625	0.000286878	1.0758
hydrolase activity, acting on carbon-nitrogen (but not peptide) bonds, in cyclic amides	1	1	2.80568e-05	2.86878e-05	0.978003
hydrolase activity, acting on carbon-nitrogen (but not peptide) bonds, in linear amides	8	8	0.000224454	0.000229503	0.978003
hydrolase activity, acting on carbon-nitrogen (but not peptide) bonds, in linear amidines	3	3	8.41704e-05	8.60635e-05	0.978003
hydrolase activity, acting on ester bonds	95	94	0.00266539	0.00269666	0.988408
hydrolase activity, acting on glycosyl bonds	267	242	0.00749116	0.00694245	1.07904
hydrolase activity, hydrolyzing N-glycosyl compounds	2	2	5.61136e-05	5.73756e-05	0.978003
hydrolase activity, hydrolyzing O-glycosyl compounds	237	225	0.00664946	0.00645476	1.03016
hydro-lyase activity	3	3	8.41704e-05	8.60635e-05	0.978003
hydroquinone glucosyltransferase activity	1	1	2.80568e-05	2.86878e-05	0.978003
hydroxyacylglutathione hydrolase activity	4	4	0.000112227	0.000114751	0.978003
hydroxyethylthiazole kinase activity	1	1	2.80568e-05	2.86878e-05	0.978003
hydroxymethyl-, formyl- and related transferase activity	1	2	2.80568e-05	5.73756e-05	0.489002
hydroxymethylbilane synthase activity	1	1	2.80568e-05	2.86878e-05	0.978003
hydroxymethylglutaryl-CoA lyase activity	2	2	5.61136e-05	5.73756e-05	0.978003
hydroxymethylglutaryl-CoA reductase (NADPH) activity	3	2	8.41704e-05	5.73756e-05	1.46701
hydroxymethylglutaryl-CoA synthase activity	1	1	2.80568e-05	2.86878e-05	0.978003
hyoscyamine (6S)-dioxygenase activity	4	4	0.000112227	0.000114751	0.978003
hypoxanthine phosphoribosyltransferase activity	1	1	2.80568e-05	2.86878e-05	0.978003
identical protein binding	48	41	0.00134673	0.0011762	1.14498
IkappaB kinase activity	2	3	5.61136e-05	8.60635e-05	0.652002
imidazoleglycerol-phosphate dehydratase activity	1	1	2.80568e-05	2.86878e-05	0.978003
imidazoleglycerol-phosphate synthase activity	1	1	2.80568e-05	2.86878e-05	0.978003
IMP cyclohydrolase activity	1	1	2.80568e-05	2.86878e-05	0.978003
IMP dehydrogenase activity	1	1	2.80568e-05	2.86878e-05	0.978003
importin-alpha export receptor activity	1	1	2.80568e-05	2.86878e-05	0.978003
indole-3-acetate beta-glucosyltransferase activity	8	10	0.000224454	0.000286878	0.782403
indole-3-acetic acid amido synthetase activity	1	0	2.80568e-05	0	NA
inorganic anion exchanger activity	4	4	0.000112227	0.000114751	0.978003
inorganic diphosphatase activity	7	5	0.000196398	0.000143439	1.3692
inorganic phosphate transmembrane transporter activity	7	7	0.000196398	0.000200815	0.978003
inositol 2-dehydrogenase activity	1	1	2.80568e-05	2.86878e-05	0.978003
inositol 3-alpha-galactosyltransferase activity	1	0	2.80568e-05	0	NA
inositol hexakisphosphate binding	5	5	0.000140284	0.000143439	0.978003
inositol or phosphatidylinositol kinase activity	8	5	0.000224454	0.000143439	1.56481
inositol or phosphatidylinositol phosphatase activity	21	20	0.000589193	0.000573756	1.0269
inositol oxygenase activity	2	2	5.61136e-05	5.73756e-05	0.978003
inositol pentakisphosphate 2-kinase activity	3	3	8.41704e-05	8.60635e-05	0.978003
inositol tetrakisphosphate 1-kinase activity	6	6	0.000168341	0.000172127	0.978003
inositol-1(or 4)-monophosphatase activity	4	4	0.000112227	0.000114751	0.978003
inositol-1,3,4-trisphosphate 5/6-kinase activity	6	6	0.000168341	0.000172127	0.978003
inositol-1,4-bisphosphate 1-phosphatase activity	3	3	8.41704e-05	8.60635e-05	0.978003
inositol-3-phosphate synthase activity	1	1	2.80568e-05	2.86878e-05	0.978003
inositol-polyphosphate 5-phosphatase activity	3	5	8.41704e-05	0.000143439	0.586802
intracellular cyclic nucleotide activated cation channel activity	5	5	0.000140284	0.000143439	0.978003
intramolecular lyase activity	4	4	0.000112227	0.000114751	0.978003
intramolecular oxidoreductase activity	1	1	2.80568e-05	2.86878e-05	0.978003
intramolecular transferase activity	14	10	0.000392795	0.000286878	1.3692
intramolecular transferase activity, phosphotransferases	7	6	0.000196398	0.000172127	1.141
ion channel activity	77	74	0.00216037	0.0021229	1.01765
ionotropic glutamate receptor activity	31	28	0.00086976	0.000803259	1.08279
iron ion binding	527	516	0.0147859	0.0148029	0.998852
iron ion transmembrane transporter activity	2	2	5.61136e-05	5.73756e-05	0.978003
iron-sulfur cluster binding	61	51	0.00171146	0.00146308	1.16977
isoamylase activity	1	1	2.80568e-05	2.86878e-05	0.978003
isochorismate synthase activity	1	1	2.80568e-05	2.86878e-05	0.978003
isocitrate dehydrogenase (NAD+) activity	4	3	0.000112227	8.60635e-05	1.304
isocitrate dehydrogenase (NADP+) activity	1	2	2.80568e-05	5.73756e-05	0.489002
isoflavone 2'-hydroxylase activity	14	13	0.000392795	0.000372942	1.05323
isoleucine-tRNA ligase activity	4	4	0.000112227	0.000114751	0.978003
isomerase activity	149	147	0.00418046	0.00421711	0.99131
isopenicillin-N epimerase activity	1	1	2.80568e-05	2.86878e-05	0.978003
isopentenyl-diphosphate delta-isomerase activity	1	1	2.80568e-05	2.86878e-05	0.978003
isovaleryl-CoA dehydrogenase activity	2	2	5.61136e-05	5.73756e-05	0.978003
jasmonate O-methyltransferase activity	6	6	0.000168341	0.000172127	0.978003
ketol-acid reductoisomerase activity	1	1	2.80568e-05	2.86878e-05	0.978003
kinase activity	914	906	0.0256439	0.0259912	0.986639
laccase activity	16	14	0.000448909	0.000401629	1.11772
lactosylceramide 4-alpha-galactosyltransferase activity	2	2	5.61136e-05	5.73756e-05	0.978003
lactoylglutathione lyase activity	10	9	0.000280568	0.00025819	1.08667
L-alanine:2-oxoglutarate aminotransferase activity	1	1	2.80568e-05	2.86878e-05	0.978003
L-amino-acid oxidase activity	2	2	5.61136e-05	5.73756e-05	0.978003
L-arabinokinase activity	1	1	2.80568e-05	2.86878e-05	0.978003
L-ascorbate oxidase activity	27	26	0.000757533	0.000745883	1.01562
L-ascorbic acid binding	15	11	0.000420852	0.000315566	1.33364
L-aspartate:2-oxoglutarate aminotransferase activity	8	8	0.000224454	0.000229503	0.978003
leucine-tRNA ligase activity	2	2	5.61136e-05	5.73756e-05	0.978003
leucocyanidin oxygenase activity	2	3	5.61136e-05	8.60635e-05	0.652002
leukotriene-A4 hydrolase activity	3	2	8.41704e-05	5.73756e-05	1.46701
L-gulonolactone oxidase activity	1	1	2.80568e-05	2.86878e-05	0.978003
L-histidine transmembrane transporter activity	1	1	2.80568e-05	2.86878e-05	0.978003
licodione synthase activity	1	1	2.80568e-05	2.86878e-05	0.978003
L-iditol 2-dehydrogenase activity	1	2	2.80568e-05	5.73756e-05	0.489002
ligase activity	287	278	0.0080523	0.00797521	1.00967
ligase activity, forming aminoacyl-tRNA and related compounds	4	4	0.000112227	0.000114751	0.978003
ligase activity, forming carbon-nitrogen bonds	2	2	5.61136e-05	5.73756e-05	0.978003
limonoid glucosyltransferase activity	3	2	8.41704e-05	5.73756e-05	1.46701
lipase activity	6	8	0.000168341	0.000229503	0.733503
lipid binding	13	14	0.000364738	0.000401629	0.908146
lipid transporter activity	2	2	5.61136e-05	5.73756e-05	0.978003
lipid-A-disaccharide synthase activity	1	1	2.80568e-05	2.86878e-05	0.978003
lipoate synthase activity	2	2	5.61136e-05	5.73756e-05	0.978003
lipoic acid binding	7	6	0.000196398	0.000172127	1.141
lipoxygenase activity	30	27	0.000841704	0.000774571	1.08667
lipoyl(octanoyl) transferase activity	1	0	2.80568e-05	0	NA
lipoyltransferase activity	1	0	2.80568e-05	0	NA
L-lactate dehydrogenase activity	2	3	5.61136e-05	8.60635e-05	0.652002
L-lysine transmembrane transporter activity	1	1	2.80568e-05	2.86878e-05	0.978003
L-malate dehydrogenase activity	5	5	0.000140284	0.000143439	0.978003
long-chain-alcohol O-fatty-acyltransferase activity	5	5	0.000140284	0.000143439	0.978003
long-chain-fatty-acid-CoA ligase activity	7	5	0.000196398	0.000143439	1.3692
L-ornithine transmembrane transporter activity	1	1	2.80568e-05	2.86878e-05	0.978003
L-threonine ammonia-lyase activity	7	6	0.000196398	0.000172127	1.141
lyase activity	228	218	0.00639695	0.00625394	1.02287
lysine-tRNA ligase activity	4	3	0.000112227	8.60635e-05	1.304
lysozyme activity	4	4	0.000112227	0.000114751	0.978003
m7G(5')pppN diphosphatase activity	1	1	2.80568e-05	2.86878e-05	0.978003
magnesium chelatase activity	3	3	8.41704e-05	8.60635e-05	0.978003
magnesium ion binding	139	130	0.00389989	0.00372942	1.04571
magnesium ion transmembrane transporter activity	1	1	2.80568e-05	2.86878e-05	0.978003
magnesium protoporphyrin IX methyltransferase activity	1	1	2.80568e-05	2.86878e-05	0.978003
magnesium-protoporphyrin IX monomethyl ester (oxidative) cyclase activity	1	1	2.80568e-05	2.86878e-05	0.978003
malate dehydrogenase activity	3	4	8.41704e-05	0.000114751	0.733503
maleylacetoacetate isomerase activity	1	1	2.80568e-05	2.86878e-05	0.978003
malic enzyme activity	9	7	0.000252511	0.000200815	1.25743
malonyl-CoA decarboxylase activity	1	1	2.80568e-05	2.86878e-05	0.978003
maltose-transporting ATPase activity	1	1	2.80568e-05	2.86878e-05	0.978003
mandelonitrile lyase activity	4	3	0.000112227	8.60635e-05	1.304
manganese ion binding	62	58	0.00173952	0.00166389	1.04545
mannan endo-1,4-beta-mannosidase activity	1	2	2.80568e-05	5.73756e-05	0.489002
mannan synthase activity	3	3	8.41704e-05	8.60635e-05	0.978003
mannitol dehydrogenase activity	3	3	8.41704e-05	8.60635e-05	0.978003
mannose-1-phosphate guanylyltransferase (GDP) activity	1	1	2.80568e-05	2.86878e-05	0.978003
mannose-6-phosphate isomerase activity	3	2	8.41704e-05	5.73756e-05	1.46701
mannosidase activity	7	3	0.000196398	8.60635e-05	2.28201
mannosylglycoprotein endo-beta-mannosidase activity	1	1	2.80568e-05	2.86878e-05	0.978003
mannosyl-glycoprotein endo-beta-N-acetylglucosaminidase activity	2	2	5.61136e-05	5.73756e-05	0.978003
mannosyl-oligosaccharide 1,2-alpha-mannosidase activity	3	3	8.41704e-05	8.60635e-05	0.978003
mannosyl-oligosaccharide 1,3-1,6-alpha-mannosidase activity	2	1	5.61136e-05	2.86878e-05	1.95601
mannosyl-oligosaccharide glucosidase activity	2	2	5.61136e-05	5.73756e-05	0.978003
MAP kinase activity	16	15	0.000448909	0.000430317	1.0432
MAP kinase kinase kinase activity	101	111	0.00283374	0.00318435	0.889895
mechanically-gated ion channel activity	6	4	0.000168341	0.000114751	1.46701
metal ion binding	1151	1119	0.0322934	0.0321017	1.00597
metal ion transmembrane transporter activity	33	35	0.000925874	0.00100407	0.922118
metallocarboxypeptidase activity	3	2	8.41704e-05	5.73756e-05	1.46701
metalloendopeptidase activity	61	63	0.00171146	0.00180733	0.946956
metalloexopeptidase activity	9	9	0.000252511	0.00025819	0.978003
metallopeptidase activity	59	60	0.00165535	0.00172127	0.961703
methenyltetrahydrofolate cyclohydrolase activity	3	2	8.41704e-05	5.73756e-05	1.46701
methionine adenosyltransferase activity	1	1	2.80568e-05	2.86878e-05	0.978003
methionine-tRNA ligase activity	3	2	8.41704e-05	5.73756e-05	1.46701
methionyl-tRNA formyltransferase activity	1	1	2.80568e-05	2.86878e-05	0.978003
methyl indole-3-acetate esterase activity	1	1	2.80568e-05	2.86878e-05	0.978003
methyl-CpG binding	0	1	0	2.86878e-05	NA
methyl-CpNpG binding	0	1	0	2.86878e-05	NA
methyl-CpNpN binding	0	1	0	2.86878e-05	NA
methylcrotonoyl-CoA carboxylase activity	2	1	5.61136e-05	2.86878e-05	1.95601
methylenetetrahydrofolate reductase (NADPH) activity	1	1	2.80568e-05	2.86878e-05	0.978003
methylglutaconyl-CoA hydratase activity	1	1	2.80568e-05	2.86878e-05	0.978003
methylisocitrate lyase activity	1	0	2.80568e-05	0	NA
methylmalonate-semialdehyde dehydrogenase (acylating) activity	2	2	5.61136e-05	5.73756e-05	0.978003
methyltransferase activity	196	187	0.00549913	0.00536462	1.02507
mevalonate kinase activity	1	0	2.80568e-05	0	NA
microtubule binding	6	6	0.000168341	0.000172127	0.978003
microtubule motor activity	62	61	0.00173952	0.00174996	0.994036
microtubule-severing ATPase activity	41	44	0.00115033	0.00126226	0.911321
mismatched DNA binding	11	13	0.000308625	0.000372942	0.827541
molybdate transmembrane-transporting ATPase activity	1	1	2.80568e-05	2.86878e-05	0.978003
molybdenum ion binding	6	7	0.000168341	0.000200815	0.838289
Mo-molybdopterin cofactor sulfurase activity	0	1	0	2.86878e-05	NA
monodehydroascorbate reductase (NADH) activity	2	2	5.61136e-05	5.73756e-05	0.978003
monooxygenase activity	251	257	0.00704225	0.00737277	0.955171
monophenol monooxygenase activity	1	0	2.80568e-05	0	NA
motor activity	73	70	0.00204815	0.00200815	1.01992
mRNA (2'-O-methyladenosine-N6-)-methyltransferase activity	1	1	2.80568e-05	2.86878e-05	0.978003
mRNA (guanine-N7-)-methyltransferase activity	2	3	5.61136e-05	8.60635e-05	0.652002
mRNA binding	2	3	5.61136e-05	8.60635e-05	0.652002
muconate cycloisomerase activity	2	2	5.61136e-05	5.73756e-05	0.978003
multiple inositol-polyphosphate phosphatase activity	6	4	0.000168341	0.000114751	1.46701
myo-inositol:hydrogen symporter activity	2	2	5.61136e-05	5.73756e-05	0.978003
myosin heavy chain kinase activity	29	27	0.000813647	0.000774571	1.05045
myosin light chain kinase activity	0	1	0	2.86878e-05	NA
myosin XI tail binding	3	3	8.41704e-05	8.60635e-05	0.978003
N2-acetyl-L-ornithine:2-oxoglutarate 5-aminotransferase activity	2	3	5.61136e-05	8.60635e-05	0.652002
N4-(beta-N-acetylglucosaminyl)-L-asparaginase activity	1	1	2.80568e-05	2.86878e-05	0.978003
N6-(1,2-dicarboxyethyl)AMP AMP-lyase (fumarate-forming) activity	1	1	2.80568e-05	2.86878e-05	0.978003
N-acetyl-gamma-glutamyl-phosphate reductase activity	1	1	2.80568e-05	2.86878e-05	0.978003
N-acetyltransferase activity	29	28	0.000813647	0.000803259	1.01293
NAD binding	4	4	0.000112227	0.000114751	0.978003
NAD or NADH binding	53	45	0.00148701	0.00129095	1.15187
NAD(P)H dehydrogenase (quinone) activity	0	2	0	5.73756e-05	NA
NAD(P)H oxidase activity	10	9	0.000280568	0.00025819	1.08667
NAD+ ADP-ribosyltransferase activity	5	7	0.000140284	0.000200815	0.698574
NAD+ diphosphatase activity	7	6	0.000196398	0.000172127	1.141
NAD+ kinase activity	3	3	8.41704e-05	8.60635e-05	0.978003
NAD+ synthase (glutamine-hydrolyzing) activity	1	1	2.80568e-05	2.86878e-05	0.978003
NADH dehydrogenase (quinone) activity	0	1	0	2.86878e-05	NA
NADH dehydrogenase (ubiquinone) activity	20	17	0.000561136	0.000487693	1.15059
NADH dehydrogenase activity	7	9	0.000196398	0.00025819	0.760669
NADH kinase activity	2	2	5.61136e-05	5.73756e-05	0.978003
NADP or NADPH binding	28	32	0.00078559	0.00091801	0.855753
NADPH:quinone reductase activity	6	7	0.000168341	0.000200815	0.838289
NADPH-hemoprotein reductase activity	4	2	0.000112227	5.73756e-05	1.95601
NAPE-specific phospholipase D activity	6	4	0.000168341	0.000114751	1.46701
naphthoate synthase activity	1	1	2.80568e-05	2.86878e-05	0.978003
naringenin 3-dioxygenase activity	3	2	8.41704e-05	5.73756e-05	1.46701
naringenin-chalcone synthase activity	3	3	8.41704e-05	8.60635e-05	0.978003
N-carbamoylputrescine amidase activity	1	0	2.80568e-05	0	NA
nickel ion binding	4	3	0.000112227	8.60635e-05	1.304
nicotianamine synthase activity	4	4	0.000112227	0.000114751	0.978003
nicotinamidase activity	0	1	0	2.86878e-05	NA
nicotinate phosphoribosyltransferase activity	1	1	2.80568e-05	2.86878e-05	0.978003
nicotinate-nucleotide diphosphorylase (carboxylating) activity	2	3	5.61136e-05	8.60635e-05	0.652002
nitrate reductase (NADH) activity	1	1	2.80568e-05	2.86878e-05	0.978003
nitric-oxide synthase activity	1	1	2.80568e-05	2.86878e-05	0.978003
N-methylcoclaurine 3'-monooxygenase activity	4	4	0.000112227	0.000114751	0.978003
N-methyltransferase activity	1	2	2.80568e-05	5.73756e-05	0.489002
non-membrane spanning protein tyrosine kinase activity	150	150	0.00420852	0.00430317	0.978003
nuclease activity	37	33	0.0010381	0.000946698	1.09655
nucleic acid binding	858	846	0.0240727	0.0242699	0.991876
nucleobase transmembrane transporter activity	1	1	2.80568e-05	2.86878e-05	0.978003
nucleobase, nucleoside, nucleotide kinase activity	7	6	0.000196398	0.000172127	1.141
nucleoside binding	2	2	5.61136e-05	5.73756e-05	0.978003
nucleoside diphosphate kinase activity	3	3	8.41704e-05	8.60635e-05	0.978003
nucleoside transmembrane transporter activity	6	7	0.000168341	0.000200815	0.838289
nucleoside triphosphate adenylate kinase activity	2	2	5.61136e-05	5.73756e-05	0.978003
nucleoside-triphosphatase activity	308	288	0.00864149	0.00826209	1.04592
nucleosome binding	1	1	2.80568e-05	2.86878e-05	0.978003
nucleotide binding	1611	1584	0.0451995	0.0454415	0.994674
nucleotide kinase activity	6	5	0.000168341	0.000143439	1.1736
nucleotide-sugar transmembrane transporter activity	3	3	8.41704e-05	8.60635e-05	0.978003
nucleotidyltransferase activity	100	96	0.00280568	0.00275403	1.01875
nutrient reservoir activity	29	29	0.000813647	0.000831947	0.978003
octanoyltransferase activity	2	2	5.61136e-05	5.73756e-05	0.978003
oleoyl-[acyl-carrier-protein] hydrolase activity	5	5	0.000140284	0.000143439	0.978003
oligopeptide transporter activity	1	1	2.80568e-05	2.86878e-05	0.978003
oligosaccharyl transferase activity	3	3	8.41704e-05	8.60635e-05	0.978003
omega peptidase activity	2	3	5.61136e-05	8.60635e-05	0.652002
O-methyltransferase activity	19	19	0.000533079	0.000545069	0.978003
O-phospho-L-serine:2-oxoglutarate aminotransferase activity	1	1	2.80568e-05	2.86878e-05	0.978003
ornithine carbamoyltransferase activity	1	1	2.80568e-05	2.86878e-05	0.978003
ornithine cyclodeaminase activity	1	1	2.80568e-05	2.86878e-05	0.978003
ornithine decarboxylase activity	1	1	2.80568e-05	2.86878e-05	0.978003
ornithine-oxo-acid transaminase activity	2	1	5.61136e-05	2.86878e-05	1.95601
orotate phosphoribosyltransferase activity	1	1	2.80568e-05	2.86878e-05	0.978003
orotidine-5'-phosphate decarboxylase activity	1	1	2.80568e-05	2.86878e-05	0.978003
o-succinylbenzoate-CoA ligase activity	8	8	0.000224454	0.000229503	0.978003
oxalate oxidase activity	2	2	5.61136e-05	5.73756e-05	0.978003
oxalyl-CoA decarboxylase activity	0	1	0	2.86878e-05	NA
oxidized purine base lesion DNA N-glycosylase activity	2	2	5.61136e-05	5.73756e-05	0.978003
oxidoreductase activity	1382	1341	0.0387745	0.0384704	1.00791
oxidoreductase activity, acting on CH-OH group of donors	19	18	0.000533079	0.000516381	1.03234
oxidoreductase activity, acting on diphenols and related substances as donors	2	2	5.61136e-05	5.73756e-05	0.978003
oxidoreductase activity, acting on NADH or NADPH	13	8	0.000364738	0.000229503	1.58926
oxidoreductase activity, acting on NADH or NADPH, quinone or similar compound as acceptor	3	3	8.41704e-05	8.60635e-05	0.978003
oxidoreductase activity, acting on NADH or NADPH, with oxygen as acceptor	11	10	0.000308625	0.000286878	1.0758
oxidoreductase activity, acting on paired donors, with incorporation or reduction of molecular oxygen	20	17	0.000561136	0.000487693	1.15059
oxidoreductase activity, acting on paired donors, with incorporation or reduction of molecular oxygen, NADH or NADPH as one donor, and incorporation of one atom of oxygen	1	1	2.80568e-05	2.86878e-05	0.978003
oxidoreductase activity, acting on paired donors, with oxidation of a pair of donors resulting in the reduction of molecular oxygen to two molecules of water	8	8	0.000224454	0.000229503	0.978003
oxidoreductase activity, acting on single donors with incorporation of molecular oxygen	1	1	2.80568e-05	2.86878e-05	0.978003
oxidoreductase activity, acting on single donors with incorporation of molecular oxygen, incorporation of two atoms of oxygen	77	73	0.00216037	0.00209421	1.03159
oxidoreductase activity, acting on sulfur group of donors, disulfide as acceptor	6	6	0.000168341	0.000172127	0.978003
oxidoreductase activity, acting on sulfur group of donors, oxygen as acceptor	1	1	2.80568e-05	2.86878e-05	0.978003
oxidoreductase activity, acting on the aldehyde or oxo group of donors, disulfide as acceptor	9	7	0.000252511	0.000200815	1.25743
oxidoreductase activity, acting on the aldehyde or oxo group of donors, NAD or NADP as acceptor	9	7	0.000252511	0.000200815	1.25743
oxidoreductase activity, acting on the CH-CH group of donors	15	13	0.000420852	0.000372942	1.12847
oxidoreductase activity, acting on the CH-CH group of donors, iron-sulfur protein as acceptor	1	1	2.80568e-05	2.86878e-05	0.978003
oxidoreductase activity, acting on the CH-NH2 group of donors	1	1	2.80568e-05	2.86878e-05	0.978003
oxidoreductase activity, acting on the CH-NH2 group of donors, NAD or NADP as acceptor	3	3	8.41704e-05	8.60635e-05	0.978003
oxidoreductase activity, acting on the CH-OH group of donors, NAD or NADP as acceptor	47	43	0.00131867	0.00123358	1.06898
oxo-acid-lyase activity	4	3	0.000112227	8.60635e-05	1.304
oxoglutarate dehydrogenase (succinyl-transferring) activity	2	2	5.61136e-05	5.73756e-05	0.978003
oxygen binding	4	4	0.000112227	0.000114751	0.978003
oxygen-dependent protoporphyrinogen oxidase activity	2	2	5.61136e-05	5.73756e-05	0.978003
palmitoyl-(protein) hydrolase activity	2	2	5.61136e-05	5.73756e-05	0.978003
palmitoyl-CoA hydrolase activity	1	1	2.80568e-05	2.86878e-05	0.978003
pantoate-beta-alanine ligase activity	3	2	8.41704e-05	5.73756e-05	1.46701
pantothenate kinase activity	1	1	2.80568e-05	2.86878e-05	0.978003
pectate lyase activity	9	10	0.000252511	0.000286878	0.880203
pectinesterase activity	75	73	0.00210426	0.00209421	1.0048
peptidase activity	225	221	0.00631278	0.00634001	0.995705
peptidase inhibitor activity	13	6	0.000364738	0.000172127	2.11901
peptide alpha-N-acetyltransferase activity	1	1	2.80568e-05	2.86878e-05	0.978003
peptide deformylase activity	2	1	5.61136e-05	2.86878e-05	1.95601
peptide receptor activity	0	1	0	2.86878e-05	NA
peptide transporter activity	0	1	0	2.86878e-05	NA
peptide-aspartate beta-dioxygenase activity	1	1	2.80568e-05	2.86878e-05	0.978003
peptide-methionine-(S)-S-oxide reductase activity	6	6	0.000168341	0.000172127	0.978003
peptide-O-fucosyltransferase activity	1	1	2.80568e-05	2.86878e-05	0.978003
peptide-transporting ATPase activity	3	1	8.41704e-05	2.86878e-05	2.93401
peptidyl-prolyl cis-trans isomerase activity	40	38	0.00112227	0.00109014	1.02948
peroxidase activity	87	90	0.00244094	0.0025819	0.945403
peroxiredoxin activity	2	2	5.61136e-05	5.73756e-05	0.978003
phenylalanine racemase (ATP-hydrolyzing) activity	2	2	5.61136e-05	5.73756e-05	0.978003
phenylalanine-tRNA ligase activity	5	5	0.000140284	0.000143439	0.978003
pheophytinase activity	1	0	2.80568e-05	0	NA
phosphatase activator activity	2	2	5.61136e-05	5.73756e-05	0.978003
phosphatase activity	27	31	0.000757533	0.000889322	0.851809
phosphate transmembrane transporter activity	1	1	2.80568e-05	2.86878e-05	0.978003
phosphate transmembrane-transporting ATPase activity	1	1	2.80568e-05	2.86878e-05	0.978003
phosphatidate cytidylyltransferase activity	5	3	0.000140284	8.60635e-05	1.63001
phosphatidate phosphatase activity	1	2	2.80568e-05	5.73756e-05	0.489002
phosphatidylcholine phospholipase C activity	3	3	8.41704e-05	8.60635e-05	0.978003
phosphatidylcholine-sterol O-acyltransferase activity	7	7	0.000196398	0.000200815	0.978003
phosphatidylinositol binding	9	10	0.000252511	0.000286878	0.880203
phosphatidylinositol N-acetylglucosaminyltransferase activity	4	4	0.000112227	0.000114751	0.978003
phosphatidylinositol phosphate kinase activity	13	16	0.000364738	0.000459005	0.794628
phosphatidylinositol-3,4,5-trisphosphate 3-phosphatase activity	2	2	5.61136e-05	5.73756e-05	0.978003
phosphatidylinositol-4,5-bisphosphate 5-phosphatase activity	3	4	8.41704e-05	0.000114751	0.733503
phosphatidylinositol-4-phosphate phosphatase activity	1	1	2.80568e-05	2.86878e-05	0.978003
phosphatidyl-N-dimethylethanolamine N-methyltransferase activity	0	2	0	5.73756e-05	NA
phosphatidyl-N-methylethanolamine N-methyltransferase activity	0	2	0	5.73756e-05	NA
phosphatidylserine decarboxylase activity	4	4	0.000112227	0.000114751	0.978003
phosphoacetylglucosamine mutase activity	1	1	2.80568e-05	2.86878e-05	0.978003
phosphodiesterase I activity	1	1	2.80568e-05	2.86878e-05	0.978003
phosphoenolpyruvate carboxykinase (ATP) activity	2	2	5.61136e-05	5.73756e-05	0.978003
phosphoenolpyruvate carboxykinase activity	2	2	5.61136e-05	5.73756e-05	0.978003
phosphoenolpyruvate carboxylase activity	4	3	0.000112227	8.60635e-05	1.304
phosphoethanolamine N-methyltransferase activity	3	3	8.41704e-05	8.60635e-05	0.978003
phosphoethanolamine/phosphocholine phosphatase activity	2	2	5.61136e-05	5.73756e-05	0.978003
phosphoglucan, water dikinase activity	1	1	2.80568e-05	2.86878e-05	0.978003
phosphoglucomutase activity	3	2	8.41704e-05	5.73756e-05	1.46701
phosphogluconate dehydrogenase (decarboxylating) activity	10	9	0.000280568	0.00025819	1.08667
phosphoglycerate dehydrogenase activity	3	3	8.41704e-05	8.60635e-05	0.978003
phosphoglycerate kinase activity	3	2	8.41704e-05	5.73756e-05	1.46701
phosphoglycerate mutase activity	2	2	5.61136e-05	5.73756e-05	0.978003
phosphoglycolate phosphatase activity	9	9	0.000252511	0.00025819	0.978003
phosphoinositide binding	3	5	8.41704e-05	0.000143439	0.586802
phosphoinositide phospholipase C activity	5	3	0.000140284	8.60635e-05	1.63001
phospholipase A2 activity	3	4	8.41704e-05	0.000114751	0.733503
phospholipase activator activity	1	1	2.80568e-05	2.86878e-05	0.978003
phospholipase C activity	17	15	0.000476965	0.000430317	1.1084
phospholipase D activity	10	7	0.000280568	0.000200815	1.39715
phospholipid binding	12	13	0.000336681	0.000372942	0.902772
phospholipid:diacylglycerol acyltransferase activity	1	1	2.80568e-05	2.86878e-05	0.978003
phospholipid-translocating ATPase activity	9	8	0.000252511	0.000229503	1.10025
phosphomannomutase activity	4	4	0.000112227	0.000114751	0.978003
phosphomethylpyrimidine kinase activity	3	3	8.41704e-05	8.60635e-05	0.978003
phosphomevalonate kinase activity	1	1	2.80568e-05	2.86878e-05	0.978003
phospho-N-acetylmuramoyl-pentapeptide-transferase activity	1	1	2.80568e-05	2.86878e-05	0.978003
phosphonate transmembrane-transporting ATPase activity	17	20	0.000476965	0.000573756	0.831303
phosphopantetheine binding	8	5	0.000224454	0.000143439	1.56481
phosphopantothenate--cysteine ligase activity	1	1	2.80568e-05	2.86878e-05	0.978003
phosphopantothenoylcysteine decarboxylase activity	1	1	2.80568e-05	2.86878e-05	0.978003
phosphoprotein phosphatase activity	128	119	0.00359127	0.00341385	1.05197
phosphopyruvate hydratase activity	1	1	2.80568e-05	2.86878e-05	0.978003
phosphoribosylamine-glycine ligase activity	1	1	2.80568e-05	2.86878e-05	0.978003
phosphoribosylaminoimidazole carboxylase activity	1	2	2.80568e-05	5.73756e-05	0.489002
phosphoribosylaminoimidazolecarboxamide formyltransferase activity	1	1	2.80568e-05	2.86878e-05	0.978003
phosphoribosylaminoimidazolesuccinocarboxamide synthase activity	1	1	2.80568e-05	2.86878e-05	0.978003
phosphoribosyl-AMP cyclohydrolase activity	1	1	2.80568e-05	2.86878e-05	0.978003
phosphoribosylanthranilate isomerase activity	1	1	2.80568e-05	2.86878e-05	0.978003
phosphoribosyl-ATP diphosphatase activity	1	1	2.80568e-05	2.86878e-05	0.978003
phosphoribosylformylglycinamidine cyclo-ligase activity	1	1	2.80568e-05	2.86878e-05	0.978003
phosphoribosylformylglycinamidine synthase activity	2	1	5.61136e-05	2.86878e-05	1.95601
phosphoribulokinase activity	2	2	5.61136e-05	5.73756e-05	0.978003
phosphoric diester hydrolase activity	23	21	0.000645306	0.000602444	1.07115
phosphoric ester hydrolase activity	3	3	8.41704e-05	8.60635e-05	0.978003
phosphorylase activity	5	2	0.000140284	5.73756e-05	2.44501
phosphorylase kinase activity	2	2	5.61136e-05	5.73756e-05	0.978003
phosphoserine phosphatase activity	1	2	2.80568e-05	5.73756e-05	0.489002
phosphotransferase activity, alcohol group as acceptor	46	47	0.00129061	0.00134833	0.957195
phosphotransferase activity, for other substituted phosphate groups	5	7	0.000140284	0.000200815	0.698574
phosphotransferase activity, phosphate group as acceptor	6	5	0.000168341	0.000143439	1.1736
Photinus-luciferin 4-monooxygenase (ATP-hydrolyzing) activity	6	4	0.000168341	0.000114751	1.46701
photoreceptor activity	3	3	8.41704e-05	8.60635e-05	0.978003
phytochromobilin:ferredoxin oxidoreductase activity	1	1	2.80568e-05	2.86878e-05	0.978003
plastoquinol-plastocyanin reductase activity	1	1	2.80568e-05	2.86878e-05	0.978003
poly(A)-specific ribonuclease activity	10	13	0.000280568	0.000372942	0.75231
poly(ADP-ribose) glycohydrolase activity	2	2	5.61136e-05	5.73756e-05	0.978003
poly(G) RNA binding	1	1	2.80568e-05	2.86878e-05	0.978003
poly(U) RNA binding	1	1	2.80568e-05	2.86878e-05	0.978003
polyamine oxidase activity	1	1	2.80568e-05	2.86878e-05	0.978003
polyamine-transporting ATPase activity	7	8	0.000196398	0.000229503	0.855753
polygalacturonase activity	70	53	0.00196398	0.00152045	1.2917
polyneuridine-aldehyde esterase activity	7	8	0.000196398	0.000229503	0.855753
polynucleotide 3'-phosphatase activity	1	1	2.80568e-05	2.86878e-05	0.978003
polynucleotide adenylyltransferase activity	7	7	0.000196398	0.000200815	0.978003
polynucleotide kinase activity	3	1	8.41704e-05	2.86878e-05	2.93401
polyribonucleotide nucleotidyltransferase activity	2	3	5.61136e-05	8.60635e-05	0.652002
polysaccharide binding	1	1	2.80568e-05	2.86878e-05	0.978003
porphobilinogen synthase activity	1	1	2.80568e-05	2.86878e-05	0.978003
positive transcription elongation factor activity	1	1	2.80568e-05	2.86878e-05	0.978003
potassium channel activity	3	3	8.41704e-05	8.60635e-05	0.978003
potassium ion binding	16	16	0.000448909	0.000459005	0.978003
potassium ion transmembrane transporter activity	18	18	0.000505022	0.000516381	0.978003
P-P-bond-hydrolysis-driven protein transmembrane transporter activity	12	12	0.000336681	0.000344254	0.978003
prenylcysteine methylesterase activity	1	1	2.80568e-05	2.86878e-05	0.978003
prenylcysteine oxidase activity	1	1	2.80568e-05	2.86878e-05	0.978003
prenyltransferase activity	6	6	0.000168341	0.000172127	0.978003
prephenate dehydratase activity	6	6	0.000168341	0.000172127	0.978003
prephenate dehydrogenase (NADP+) activity	2	2	5.61136e-05	5.73756e-05	0.978003
procollagen-lysine 5-dioxygenase activity	1	1	2.80568e-05	2.86878e-05	0.978003
procollagen-proline 4-dioxygenase activity	8	5	0.000224454	0.000143439	1.56481
proline dehydrogenase activity	1	1	2.80568e-05	2.86878e-05	0.978003
proline-tRNA ligase activity	4	3	0.000112227	8.60635e-05	1.304
prostaglandin-E2 9-reductase activity	2	2	5.61136e-05	5.73756e-05	0.978003
prostaglandin-endoperoxide synthase activity	1	1	2.80568e-05	2.86878e-05	0.978003
protein anchor	0	1	0	2.86878e-05	NA
protein binding	1155	1143	0.0324056	0.0327902	0.988271
protein dimerization activity	173	169	0.00485382	0.00484824	1.00115
protein disulfide isomerase activity	5	4	0.000140284	0.000114751	1.2225
protein disulfide oxidoreductase activity	39	43	0.00109421	0.00123358	0.887026
protein domain specific binding	8	8	0.000224454	0.000229503	0.978003
protein farnesyltransferase activity	1	1	2.80568e-05	2.86878e-05	0.978003
protein heterodimerization activity	3	3	8.41704e-05	8.60635e-05	0.978003
protein histidine kinase activity	15	17	0.000420852	0.000487693	0.862944
protein homodimerization activity	14	12	0.000392795	0.000344254	1.141
protein kinase activity	865	850	0.0242691	0.0243846	0.995262
protein kinase C activity	11	10	0.000308625	0.000286878	1.0758
protein kinase inhibitor activity	0	1	0	2.86878e-05	NA
protein kinase regulator activity	2	1	5.61136e-05	2.86878e-05	1.95601
protein methyltransferase activity	3	3	8.41704e-05	8.60635e-05	0.978003
protein phosphatase type 2A regulator activity	11	10	0.000308625	0.000286878	1.0758
protein prenyltransferase activity	4	5	0.000112227	0.000143439	0.782403
protein serine/threonine kinase activity	704	689	0.019752	0.0197659	0.999295
protein serine/threonine phosphatase activity	38	35	0.00106616	0.00100407	1.06183
protein tag	2	1	5.61136e-05	2.86878e-05	1.95601
protein transporter activity	46	44	0.00129061	0.00126226	1.02246
protein tyrosine kinase activity	139	138	0.00389989	0.00395892	0.98509
protein tyrosine phosphatase activity	18	18	0.000505022	0.000516381	0.978003
protein tyrosine phosphatase activity, metal-dependent	1	1	2.80568e-05	2.86878e-05	0.978003
protein tyrosine/serine/threonine phosphatase activity	12	14	0.000336681	0.000401629	0.838289
protein xylosyltransferase activity	7	7	0.000196398	0.000200815	0.978003
protein-arginine omega-N asymmetric methyltransferase activity	1	1	2.80568e-05	2.86878e-05	0.978003
protein-arginine omega-N monomethyltransferase activity	1	1	2.80568e-05	2.86878e-05	0.978003
protein-L-isoaspartate (D-aspartate) O-methyltransferase activity	1	1	2.80568e-05	2.86878e-05	0.978003
protein-S-isoprenylcysteine O-methyltransferase activity	1	1	2.80568e-05	2.86878e-05	0.978003
protein-tyrosine sulfotransferase activity	0	1	0	2.86878e-05	NA
protochlorophyllide reductase activity	7	5	0.000196398	0.000143439	1.3692
protoheme IX farnesyltransferase activity	1	1	2.80568e-05	2.86878e-05	0.978003
proton-transporting ATPase activity, rotational mechanism	14	11	0.000392795	0.000315566	1.24473
pseudouridine synthase activity	19	21	0.000533079	0.000602444	0.88486
pullulanase activity	1	1	2.80568e-05	2.86878e-05	0.978003
purine nucleosidase activity	1	1	2.80568e-05	2.86878e-05	0.978003
purine nucleotide binding	2	2	5.61136e-05	5.73756e-05	0.978003
purine transmembrane transporter activity	3	4	8.41704e-05	0.000114751	0.733503
putrescine N-methyltransferase activity	1	1	2.80568e-05	2.86878e-05	0.978003
pyridoxal 4-dehydrogenase activity	1	1	2.80568e-05	2.86878e-05	0.978003
pyridoxal kinase activity	2	1	5.61136e-05	2.86878e-05	1.95601
pyridoxal phosphate binding	110	105	0.00308625	0.00301222	1.02458
pyridoxamine-phosphate oxidase activity	2	2	5.61136e-05	5.73756e-05	0.978003
pyridoxine 4-dehydrogenase activity	2	2	5.61136e-05	5.73756e-05	0.978003
pyrroline-5-carboxylate reductase activity	1	2	2.80568e-05	5.73756e-05	0.489002
pyruvate decarboxylase activity	4	4	0.000112227	0.000114751	0.978003
pyruvate dehydrogenase (acetyl-transferring) activity	6	6	0.000168341	0.000172127	0.978003
pyruvate dehydrogenase (acetyl-transferring) kinase activity	1	1	2.80568e-05	2.86878e-05	0.978003
pyruvate kinase activity	9	8	0.000252511	0.000229503	1.10025
queuine tRNA-ribosyltransferase activity	3	4	8.41704e-05	0.000114751	0.733503
quinolinate synthetase A activity	2	1	5.61136e-05	2.86878e-05	1.95601
quinone binding	24	12	0.000673363	0.000344254	1.95601
Rab GDP-dissociation inhibitor activity	2	3	5.61136e-05	8.60635e-05	0.652002
Rab geranylgeranyltransferase activity	1	0	2.80568e-05	0	NA
Rab GTPase activator activity	11	9	0.000308625	0.00025819	1.19534
racemase and epimerase activity, acting on amino acids and derivatives	1	1	2.80568e-05	2.86878e-05	0.978003
racemase and epimerase activity, acting on carbohydrates and derivatives	8	7	0.000224454	0.000200815	1.11772
receptor activity	313	319	0.00878177	0.00915141	0.959608
recombinase activity	1	1	2.80568e-05	2.86878e-05	0.978003
reticuline oxidase activity	16	15	0.000448909	0.000430317	1.0432
retinal dehydrogenase activity	2	2	5.61136e-05	5.73756e-05	0.978003
Rho GDP-dissociation inhibitor activity	5	5	0.000140284	0.000143439	0.978003
Rho guanyl-nucleotide exchange factor activity	9	9	0.000252511	0.00025819	0.978003
rhodopsin kinase activity	8	9	0.000224454	0.00025819	0.869336
riboflavin kinase activity	1	1	2.80568e-05	2.86878e-05	0.978003
riboflavin synthase activity	1	1	2.80568e-05	2.86878e-05	0.978003
ribokinase activity	6	5	0.000168341	0.000143439	1.1736
ribonuclease activity	7	7	0.000196398	0.000200815	0.978003
ribonuclease H activity	17	30	0.000476965	0.000860635	0.554202
ribonuclease III activity	13	11	0.000364738	0.000315566	1.15582
ribonuclease inhibitor activity	2	2	5.61136e-05	5.73756e-05	0.978003
ribonuclease T2 activity	9	8	0.000252511	0.000229503	1.10025
ribonucleoside binding	9	11	0.000252511	0.000315566	0.800185
ribonucleoside-diphosphate reductase activity	2	2	5.61136e-05	5.73756e-05	0.978003
ribose phosphate diphosphokinase activity	4	4	0.000112227	0.000114751	0.978003
ribose-5-phosphate isomerase activity	4	4	0.000112227	0.000114751	0.978003
ribosome binding	10	11	0.000280568	0.000315566	0.889094
ribulose-bisphosphate carboxylase activity	4	1	0.000112227	2.86878e-05	3.91201
ribulose-phosphate 3-epimerase activity	1	0	2.80568e-05	0	NA
RNA binding	334	336	0.00937097	0.00963911	0.972182
RNA helicase activity	1	0	2.80568e-05	0	NA
RNA ligase (ATP) activity	3	1	8.41704e-05	2.86878e-05	2.93401
RNA methyltransferase activity	14	14	0.000392795	0.000401629	0.978003
RNA polymerase II carboxy-terminal domain kinase activity	22	21	0.000617249	0.000602444	1.02458
RNA polymerase II transcription factor activity	17	18	0.000476965	0.000516381	0.92367
RNA polymerase II transcription mediator activity	7	5	0.000196398	0.000143439	1.3692
RNA splicing factor activity, transesterification mechanism	2	2	5.61136e-05	5.73756e-05	0.978003
RNA-3'-phosphate cyclase activity	1	1	2.80568e-05	2.86878e-05	0.978003
RNA-directed DNA polymerase activity	51	60	0.0014309	0.00172127	0.831303
RNA-directed RNA polymerase activity	9	9	0.000252511	0.00025819	0.978003
rRNA (adenine) methyltransferase activity	5	4	0.000140284	0.000114751	1.2225
rRNA (adenine-N6-)-methyltransferase activity	3	3	8.41704e-05	8.60635e-05	0.978003
rRNA (adenine-N6,N6-)-dimethyltransferase activity	5	4	0.000140284	0.000114751	1.2225
rRNA binding	27	15	0.000757533	0.000430317	1.76041
rRNA methyltransferase activity	6	5	0.000168341	0.000143439	1.1736
rRNA N-glycosylase activity	2	2	5.61136e-05	5.73756e-05	0.978003
S-(hydroxymethyl)glutathione dehydrogenase activity	3	4	8.41704e-05	0.000114751	0.733503
saccharopine dehydrogenase (NAD+, L-glutamate-forming) activity	1	2	2.80568e-05	5.73756e-05	0.489002
saccharopine dehydrogenase (NADP+, L-glutamate-forming) activity	3	3	8.41704e-05	8.60635e-05	0.978003
saccharopine dehydrogenase (NADP+, L-lysine-forming) activity	3	3	8.41704e-05	8.60635e-05	0.978003
S-adenosylmethionine transmembrane transporter activity	1	0	2.80568e-05	0	NA
S-adenosylmethionine-dependent methyltransferase activity	6	5	0.000168341	0.000143439	1.1736
salutaridinol 7-O-acetyltransferase activity	9	11	0.000252511	0.000315566	0.800185
sarcosine oxidase activity	1	1	2.80568e-05	2.86878e-05	0.978003
secologanin synthase activity	9	8	0.000252511	0.000229503	1.10025
secondary active sulfate transmembrane transporter activity	15	14	0.000420852	0.000401629	1.04786
sedoheptulose-bisphosphatase activity	0	1	0	2.86878e-05	NA
selenium binding	3	3	8.41704e-05	8.60635e-05	0.978003
selenocysteine lyase activity	0	1	0	2.86878e-05	NA
sequence-specific DNA binding	274	287	0.00768756	0.0082334	0.933704
serine C-palmitoyltransferase activity	1	1	2.80568e-05	2.86878e-05	0.978003
serine O-acetyltransferase activity	3	3	8.41704e-05	8.60635e-05	0.978003
serine-tRNA ligase activity	2	2	5.61136e-05	5.73756e-05	0.978003
serine-type carboxypeptidase activity	30	27	0.000841704	0.000774571	1.08667
serine-type endopeptidase activity	81	73	0.0022726	0.00209421	1.08518
serine-type endopeptidase inhibitor activity	3	4	8.41704e-05	0.000114751	0.733503
serine-type peptidase activity	34	34	0.000953931	0.000975386	0.978003
S-formylglutathione hydrolase activity	0	2	0	5.73756e-05	NA
shikimate 5-dehydrogenase activity	3	3	8.41704e-05	8.60635e-05	0.978003
shikimate kinase activity	3	4	8.41704e-05	0.000114751	0.733503
sialyltransferase activity	3	3	8.41704e-05	8.60635e-05	0.978003
sigma factor activity	6	7	0.000168341	0.000200815	0.838289
signal recognition particle binding	1	1	2.80568e-05	2.86878e-05	0.978003
signal transducer activity	62	62	0.00173952	0.00177864	0.978003
single-stranded DNA binding	10	9	0.000280568	0.00025819	1.08667
single-stranded DNA specific endodeoxyribonuclease activity	1	1	2.80568e-05	2.86878e-05	0.978003
single-stranded RNA binding	1	0	2.80568e-05	0	NA
sirohydrochlorin cobaltochelatase activity	1	1	2.80568e-05	2.86878e-05	0.978003
small conjugating protein ligase activity	30	31	0.000841704	0.000889322	0.946455
small GTPase regulator activity	2	2	5.61136e-05	5.73756e-05	0.978003
small protein activating enzyme activity	3	4	8.41704e-05	0.000114751	0.733503
S-methyl-5-thioribose kinase activity	1	1	2.80568e-05	2.86878e-05	0.978003
S-methyl-5-thioribose-1-phosphate isomerase activity	1	1	2.80568e-05	2.86878e-05	0.978003
SNAP receptor activity	14	16	0.000392795	0.000459005	0.855753
S-nitrosoglutathione reductase activity	1	1	2.80568e-05	2.86878e-05	0.978003
sodium ion binding	4	4	0.000112227	0.000114751	0.978003
sodium:amino acid symporter activity	0	1	0	2.86878e-05	NA
sodium:hydrogen antiporter activity	8	7	0.000224454	0.000200815	1.11772
solute:hydrogen antiporter activity	36	36	0.00101004	0.00103276	0.978003
spermidine synthase activity	1	1	2.80568e-05	2.86878e-05	0.978003
sphinganine-1-phosphate aldolase activity	1	1	2.80568e-05	2.86878e-05	0.978003
sphingomyelin phosphodiesterase activity	5	5	0.000140284	0.000143439	0.978003
sphingosine transmembrane transporter activity	1	1	2.80568e-05	2.86878e-05	0.978003
squalene monooxygenase activity	3	3	8.41704e-05	8.60635e-05	0.978003
starch synthase activity	5	5	0.000140284	0.000143439	0.978003
stearoyl-CoA 9-desaturase activity	5	6	0.000140284	0.000172127	0.815003
steroid binding	1	1	2.80568e-05	2.86878e-05	0.978003
sterol 3-beta-glucosyltransferase activity	5	6	0.000140284	0.000172127	0.815003
sterol-4-alpha-carboxylate 3-dehydrogenase (decarboxylating) activity	3	3	8.41704e-05	8.60635e-05	0.978003
strictosidine synthase activity	6	6	0.000168341	0.000172127	0.978003
structural constituent of cell wall	5	5	0.000140284	0.000143439	0.978003
structural constituent of nuclear pore	2	1	5.61136e-05	2.86878e-05	1.95601
structural constituent of ribosome	231	203	0.00648112	0.00582363	1.1129
structural molecule activity	42	45	0.00117839	0.00129095	0.912803
substrate-specific transmembrane transporter activity	50	50	0.00140284	0.00143439	0.978003
succinate dehydrogenase (ubiquinone) activity	4	3	0.000112227	8.60635e-05	1.304
succinate-CoA ligase (ADP-forming) activity	5	5	0.000140284	0.000143439	0.978003
succinate-CoA ligase (GDP-forming) activity	1	1	2.80568e-05	2.86878e-05	0.978003
succinate-semialdehyde dehydrogenase [NAD(P)+] activity	1	0	2.80568e-05	0	NA
sucrose synthase activity	4	4	0.000112227	0.000114751	0.978003
sucrose transmembrane transporter activity	3	3	8.41704e-05	8.60635e-05	0.978003
sucrose-phosphatase activity	1	2	2.80568e-05	5.73756e-05	0.489002
sucrose-phosphate synthase activity	4	2	0.000112227	5.73756e-05	1.95601
sugar binding	101	106	0.00283374	0.00304091	0.931871
sugar:hydrogen symporter activity	5	5	0.000140284	0.000143439	0.978003
sulfate adenylyltransferase (ATP) activity	5	4	0.000140284	0.000114751	1.2225
sulfate transmembrane-transporting ATPase activity	2	4	5.61136e-05	0.000114751	0.489002
sulfiredoxin activity	0	1	0	2.86878e-05	NA
sulfite oxidase activity	2	2	5.61136e-05	5.73756e-05	0.978003
sulfite reductase (ferredoxin) activity	1	1	2.80568e-05	2.86878e-05	0.978003
sulfotransferase activity	2	2	5.61136e-05	5.73756e-05	0.978003
sulfurtransferase activity	2	2	5.61136e-05	5.73756e-05	0.978003
SUMO ligase activity	1	1	2.80568e-05	2.86878e-05	0.978003
superoxide dismutase activity	16	16	0.000448909	0.000459005	0.978003
symporter activity	6	5	0.000168341	0.000143439	1.1736
T/G mismatch-specific endonuclease activity	1	1	2.80568e-05	2.86878e-05	0.978003
tau-protein kinase activity	10	10	0.000280568	0.000286878	0.978003
taxadien-5-alpha-ol O-acetyltransferase activity	4	4	0.000112227	0.000114751	0.978003
taxane 13-alpha-hydroxylase activity	3	3	8.41704e-05	8.60635e-05	0.978003
telomeric DNA binding	0	1	0	2.86878e-05	NA
telomeric template RNA reverse transcriptase activity	1	2	2.80568e-05	5.73756e-05	0.489002
tetraacyldisaccharide 4'-kinase activity	1	1	2.80568e-05	2.86878e-05	0.978003
tetracycline:hydrogen antiporter activity	1	1	2.80568e-05	2.86878e-05	0.978003
tetrahydrofolylpolyglutamate synthase activity	3	3	8.41704e-05	8.60635e-05	0.978003
thiamin pyrophosphate binding	9	9	0.000252511	0.00025819	0.978003
thiamin-phosphate diphosphorylase activity	4	4	0.000112227	0.000114751	0.978003
thiol oxidase activity	2	2	5.61136e-05	5.73756e-05	0.978003
thiopurine S-methyltransferase activity	1	1	2.80568e-05	2.86878e-05	0.978003
thioredoxin-disulfide reductase activity	1	2	2.80568e-05	5.73756e-05	0.489002
threonine aldolase activity	3	3	8.41704e-05	8.60635e-05	0.978003
threonine synthase activity	1	1	2.80568e-05	2.86878e-05	0.978003
threonine-tRNA ligase activity	2	2	5.61136e-05	5.73756e-05	0.978003
threonine-type endopeptidase activity	13	15	0.000364738	0.000430317	0.847603
thymidine kinase activity	2	2	5.61136e-05	5.73756e-05	0.978003
thymidylate synthase activity	1	1	2.80568e-05	2.86878e-05	0.978003
trans-2-enoyl-CoA reductase (NADPH) activity	1	1	2.80568e-05	2.86878e-05	0.978003
transaldolase activity	1	2	2.80568e-05	5.73756e-05	0.489002
transaminase activity	32	29	0.000897817	0.000831947	1.07918
trans-cinnamate 4-monooxygenase activity	6	5	0.000168341	0.000143439	1.1736
transcription activator activity	16	14	0.000448909	0.000401629	1.11772
transcription activator binding	0	1	0	2.86878e-05	NA
transcription coactivator activity	6	4	0.000168341	0.000114751	1.46701
transcription cofactor activity	10	7	0.000280568	0.000200815	1.39715
transcription elongation regulator activity	6	6	0.000168341	0.000172127	0.978003
transcription factor activity	413	435	0.0115875	0.0124792	0.928541
transcription factor binding	4	4	0.000112227	0.000114751	0.978003
transcription initiation factor activity	7	6	0.000196398	0.000172127	1.141
transcription regulator activity	196	199	0.00549913	0.00570888	0.96326
transcription repressor activity	14	15	0.000392795	0.000430317	0.912803
transcription termination factor activity	1	1	2.80568e-05	2.86878e-05	0.978003
transferase activity	1722	1704	0.0483138	0.048884	0.988335
transferase activity, transferring acyl groups	1	1	2.80568e-05	2.86878e-05	0.978003
transferase activity, transferring acyl groups other than amino-acyl groups	88	92	0.002469	0.00263928	0.935482
transferase activity, transferring acyl groups, acyl groups converted into alkyl on transfer	3	4	8.41704e-05	0.000114751	0.733503
transferase activity, transferring alkyl or aryl (other than methyl) groups	4	6	0.000112227	0.000172127	0.652002
transferase activity, transferring glycosyl groups	350	344	0.00981988	0.00986861	0.995062
transferase activity, transferring hexosyl groups	142	129	0.00398406	0.00370073	1.07656
transferase activity, transferring nitrogenous groups	29	29	0.000813647	0.000831947	0.978003
transferase activity, transferring pentosyl groups	2	2	5.61136e-05	5.73756e-05	0.978003
transferase activity, transferring phosphorus-containing groups	21	20	0.000589193	0.000573756	1.0269
trans-hexaprenyltranstransferase activity	0	1	0	2.86878e-05	NA
transition metal ion binding	6	6	0.000168341	0.000172127	0.978003
transketolase activity	2	2	5.61136e-05	5.73756e-05	0.978003
translation elongation factor activity	25	18	0.00070142	0.000516381	1.35834
translation initiation factor activity	84	84	0.00235677	0.00240978	0.978003
translation release factor activity	9	8	0.000252511	0.000229503	1.10025
translation release factor activity, codon specific	8	7	0.000224454	0.000200815	1.11772
transmembrane receptor activity	36	35	0.00101004	0.00100407	1.00595
transmembrane receptor protein serine/threonine kinase activity	1	2	2.80568e-05	5.73756e-05	0.489002
transmembrane receptor protein tyrosine kinase activity	19	23	0.000533079	0.00065982	0.807916
transporter activity	227	220	0.00636889	0.00631132	1.00912
transposase activity	6	4	0.000168341	0.000114751	1.46701
trans-zeatin O-beta-D-glucosyltransferase activity	3	3	8.41704e-05	8.60635e-05	0.978003
trehalose-phosphatase activity	11	10	0.000308625	0.000286878	1.0758
triglyceride lipase activity	45	39	0.00126256	0.00111882	1.12847
triose-phosphate isomerase activity	3	3	8.41704e-05	8.60635e-05	0.978003
tripeptide transporter activity	1	1	2.80568e-05	2.86878e-05	0.978003
tRNA (5-methylaminomethyl-2-thiouridylate)-methyltransferase activity	1	0	2.80568e-05	0	NA
tRNA (adenine-N1-)-methyltransferase activity	1	1	2.80568e-05	2.86878e-05	0.978003
tRNA (guanine-N1-)-methyltransferase activity	3	1	8.41704e-05	2.86878e-05	2.93401
tRNA (guanine-N2-)-methyltransferase activity	2	2	5.61136e-05	5.73756e-05	0.978003
tRNA (guanine-N7-)-methyltransferase activity	3	2	8.41704e-05	5.73756e-05	1.46701
tRNA (guanosine-2'-O-)-methyltransferase activity	1	1	2.80568e-05	2.86878e-05	0.978003
tRNA adenylyltransferase activity	1	1	2.80568e-05	2.86878e-05	0.978003
tRNA binding	9	7	0.000252511	0.000200815	1.25743
tRNA dihydrouridine synthase activity	4	4	0.000112227	0.000114751	0.978003
tRNA isopentenyltransferase activity	9	8	0.000252511	0.000229503	1.10025
tRNA nucleotidyltransferase activity	1	1	2.80568e-05	2.86878e-05	0.978003
tRNA-intron endonuclease activity	1	1	2.80568e-05	2.86878e-05	0.978003
tropine dehydrogenase activity	2	3	5.61136e-05	8.60635e-05	0.652002
tryptophan synthase activity	8	7	0.000224454	0.000200815	1.11772
tryptophan-tRNA ligase activity	1	1	2.80568e-05	2.86878e-05	0.978003
tubulin-tyrosine ligase activity	1	1	2.80568e-05	2.86878e-05	0.978003
two-component response regulator activity	30	31	0.000841704	0.000889322	0.946455
two-component sensor activity	20	23	0.000561136	0.00065982	0.850438
tyramine N-feruloyltransferase activity	2	2	5.61136e-05	5.73756e-05	0.978003
tyrosine-tRNA ligase activity	2	2	5.61136e-05	5.73756e-05	0.978003
ubiquinol-cytochrome-c reductase activity	4	4	0.000112227	0.000114751	0.978003
ubiquitin binding	1	1	2.80568e-05	2.86878e-05	0.978003
ubiquitin protein ligase binding	8	8	0.000224454	0.000229503	0.978003
ubiquitin thiolesterase activity	48	44	0.00134673	0.00126226	1.06691
ubiquitin-protein ligase activity	78	80	0.00218843	0.00229503	0.953553
ubiquitin-specific protease activity	1	0	2.80568e-05	0	NA
ubiquitin-ubiquitin ligase activity	1	1	2.80568e-05	2.86878e-05	0.978003
UDP-arabinose 4-epimerase activity	3	2	8.41704e-05	5.73756e-05	1.46701
UDP-glucose 4,6-dehydratase activity	1	2	2.80568e-05	5.73756e-05	0.489002
UDP-glucose 4-epimerase activity	4	3	0.000112227	8.60635e-05	1.304
UDP-glucose 6-dehydrogenase activity	2	2	5.61136e-05	5.73756e-05	0.978003
UDP-glucose:4-aminobenzoate acylglucosyltransferase activity	3	2	8.41704e-05	5.73756e-05	1.46701
UDP-glucose:glycoprotein glucosyltransferase activity	1	1	2.80568e-05	2.86878e-05	0.978003
UDP-glucose:hexose-1-phosphate uridylyltransferase activity	1	1	2.80568e-05	2.86878e-05	0.978003
UDP-glucosyltransferase activity	4	2	0.000112227	5.73756e-05	1.95601
UDP-glucuronate 4-epimerase activity	3	3	8.41704e-05	8.60635e-05	0.978003
UDP-glucuronate 5'-epimerase activity	3	2	8.41704e-05	5.73756e-05	1.46701
UDP-glucuronate decarboxylase activity	2	2	5.61136e-05	5.73756e-05	0.978003
UDP-L-rhamnose synthase activity	1	2	2.80568e-05	5.73756e-05	0.489002
UDP-N-acetylglucosamine-dolichyl-phosphate N-acetylglucosaminephosphotransferase activity	1	1	2.80568e-05	2.86878e-05	0.978003
UDP-N-acetylmuramoylalanyl-D-glutamate-2,6-diaminopimelate ligase activity	1	1	2.80568e-05	2.86878e-05	0.978003
UDPsulfoquinovose synthase activity	1	1	2.80568e-05	2.86878e-05	0.978003
UMP kinase activity	2	2	5.61136e-05	5.73756e-05	0.978003
undecaprenyldiphospho-muramoylpentapeptide beta-N-acetylglucosaminyltransferase activity	1	1	2.80568e-05	2.86878e-05	0.978003
unfolded protein binding	88	81	0.002469	0.00232371	1.06252
uracil DNA N-glycosylase activity	1	1	2.80568e-05	2.86878e-05	0.978003
uracil phosphoribosyltransferase activity	1	1	2.80568e-05	2.86878e-05	0.978003
urate oxidase activity	1	1	2.80568e-05	2.86878e-05	0.978003
urea transmembrane transporter activity	0	1	0	2.86878e-05	NA
ureidoglycolate hydrolase activity	1	1	2.80568e-05	2.86878e-05	0.978003
uridine kinase activity	7	10	0.000196398	0.000286878	0.684602
uronate dehydrogenase activity	1	1	2.80568e-05	2.86878e-05	0.978003
uroporphyrin-III C-methyltransferase activity	1	1	2.80568e-05	2.86878e-05	0.978003
uroporphyrinogen decarboxylase activity	2	2	5.61136e-05	5.73756e-05	0.978003
uroporphyrinogen-III synthase activity	1	1	2.80568e-05	2.86878e-05	0.978003
UTP:glucose-1-phosphate uridylyltransferase activity	3	3	8.41704e-05	8.60635e-05	0.978003
valine-tRNA ligase activity	3	4	8.41704e-05	0.000114751	0.733503
vanillate monooxygenase activity	1	1	2.80568e-05	2.86878e-05	0.978003
violaxanthin de-epoxidase activity	1	1	2.80568e-05	2.86878e-05	0.978003
voltage-gated anion channel activity	4	4	0.000112227	0.000114751	0.978003
voltage-gated calcium channel activity	0	1	0	2.86878e-05	NA
voltage-gated chloride channel activity	7	6	0.000196398	0.000172127	1.141
voltage-gated ion channel activity	0	1	0	2.86878e-05	NA
voltage-gated potassium channel activity	16	15	0.000448909	0.000430317	1.0432
water channel activity	0	1	0	2.86878e-05	NA
xanthine oxidase activity	1	1	2.80568e-05	2.86878e-05	0.978003
xenobiotic-transporting ATPase activity	28	17	0.00078559	0.000487693	1.61083
xylan 1,4-beta-xylosidase activity	1	1	2.80568e-05	2.86878e-05	0.978003
xyloglucan 6-xylosyltransferase activity	3	3	8.41704e-05	8.60635e-05	0.978003
xyloglucan:xyloglucosyl transferase activity	26	26	0.000729476	0.000745883	0.978003
xylose isomerase activity	1	1	2.80568e-05	2.86878e-05	0.978003
xylulokinase activity	3	3	8.41704e-05	8.60635e-05	0.978003
zeaxanthin epoxidase activity	0	1	0	2.86878e-05	NA
zinc ion binding	1244	1239	0.0349026	0.0355442	0.98195
zinc ion transmembrane transporter activity	5	5	0.000140284	0.000143439	0.978003
zinc-exporting ATPase activity	3	3	8.41704e-05	8.60635e-05	0.978003

## Sheet: Cellular Component
Cellular Component GOAN	B10 line gene counts	9930 line gene counts	% of B10 line genes (%)	% of B10 line genes (%)	Relative differentiation of genes in functional groups between B10 and 9930 genomes
1,3-beta-glucan synthase complex	14	17	0.00168391	0.00212606	0.79203
3-isopropylmalate dehydratase complex	1	1	0.000120279	0.000125063	0.961751
6-phosphofructokinase complex	10	9	0.00120279	0.00112556	1.06861
acetyl-CoA carboxylase complex	3	3	0.000360837	0.000375188	0.961751
actin cytoskeleton	1	2	0.000120279	0.000250125	0.480876
actin filament	1	1	0.000120279	0.000125063	0.961751
alpha DNA polymerase:primase complex	1	1	0.000120279	0.000125063	0.961751
amyloplast	1	1	0.000120279	0.000125063	0.961751
anaphase-promoting complex	2	2	0.000240558	0.000250125	0.961751
anchored to membrane	29	28	0.00348809	0.00350175	0.9961
anchored to plasma membrane	9	8	0.00108251	0.0010005	1.08197
apical part of cell	3	1	0.000360837	0.000125063	2.88525
apical plasma membrane	1	1	0.000120279	0.000125063	0.961751
apoplast	81	76	0.0097426	0.00950475	1.02502
Arp2/3 protein complex	1	1	0.000120279	0.000125063	0.961751
beta-galactosidase complex	1	1	0.000120279	0.000125063	0.961751
cAMP-dependent protein kinase complex	2	1	0.000240558	0.000125063	1.9235
CCAAT-binding factor complex	6	6	0.000721674	0.000750375	0.961751
cell junction	5	5	0.000601395	0.000625313	0.961751
cell plate	2	3	0.000240558	0.000375188	0.641168
cell surface	2	2	0.000240558	0.000250125	0.961751
cell wall	109	111	0.0131104	0.0138819	0.944422
chloroplast	298	264	0.0358432	0.0330165	1.08561
chloroplast ATP synthase complex	2	1	0.000240558	0.000125063	1.9235
chloroplast envelope	58	53	0.00697618	0.00662831	1.05248
chloroplast inner membrane	7	4	0.000841953	0.00050025	1.68306
chloroplast intermembrane space	1	1	0.000120279	0.000125063	0.961751
chloroplast membrane	1	1	0.000120279	0.000125063	0.961751
chloroplast outer membrane	3	2	0.000360837	0.000250125	1.44263
chloroplast ribosome	1	2	0.000120279	0.000250125	0.480876
chloroplast stroma	35	32	0.00420977	0.004002	1.05192
chloroplast thylakoid	2	2	0.000240558	0.000250125	0.961751
chloroplast thylakoid lumen	6	9	0.000721674	0.00112556	0.641168
chloroplast thylakoid membrane	29	31	0.00348809	0.00387694	0.899703
chloroplastic endopeptidase Clp complex	2	1	0.000240558	0.000125063	1.9235
chromatin	24	32	0.0028867	0.004002	0.721313
chromatin remodeling complex	1	1	0.000120279	0.000125063	0.961751
chromocenter	0	1	0	0.000125063	NA
chromosome	46	44	0.00553284	0.00550275	1.00547
chromosome, centromeric region	4	5	0.000481116	0.000625313	0.769401
chromosome, telomeric region	2	1	0.000240558	0.000125063	1.9235
cis-Golgi network	3	2	0.000360837	0.000250125	1.44263
clathrin adaptor complex	16	12	0.00192446	0.00150075	1.28234
clathrin coat	9	10	0.00108251	0.00125063	0.865576
clathrin coat of coated pit	3	3	0.000360837	0.000375188	0.961751
clathrin coat of trans-Golgi network vesicle	3	4	0.000360837	0.00050025	0.721313
condensed chromosome kinetochore	1	1	0.000120279	0.000125063	0.961751
condensed nuclear chromosome	0	1	0	0.000125063	NA
COPI vesicle coat	7	8	0.000841953	0.0010005	0.841532
COPII vesicle coat	10	7	0.00120279	0.000875438	1.37393
core TFIIH complex	1	1	0.000120279	0.000125063	0.961751
cortical microtubule, transverse to long axis	0	1	0	0.000125063	NA
Cul3-RING ubiquitin ligase complex	1	1	0.000120279	0.000125063	0.961751
CUL4 RING ubiquitin ligase complex	2	2	0.000240558	0.000250125	0.961751
cullin-RING ubiquitin ligase complex	8	8	0.000962232	0.0010005	0.961751
cyanelle	0	1	0	0.000125063	NA
cytoplasm	361	364	0.0434207	0.0455228	0.953825
cytoplasmic membrane-bounded vesicle	27	18	0.00324753	0.00225113	1.44263
cytoplasmic mRNA processing body	1	1	0.000120279	0.000125063	0.961751
cytoplasmic vesicle	3	3	0.000360837	0.000375188	0.961751
cytoskeleton	24	25	0.0028867	0.00312656	0.923281
cytosol	44	35	0.00529228	0.00437719	1.20906
cytosolic large ribosomal subunit	4	3	0.000481116	0.000375188	1.28234
cytosolic ribosome	7	4	0.000841953	0.00050025	1.68306
cytosolic small ribosomal subunit	1	1	0.000120279	0.000125063	0.961751
DNA polymerase III complex	2	2	0.000240558	0.000250125	0.961751
DNA replication factor C complex	6	6	0.000721674	0.000750375	0.961751
DNA-dependent protein kinase-DNA ligase 4 complex	1	1	0.000120279	0.000125063	0.961751
DNA-directed RNA polymerase II, core complex	5	4	0.000601395	0.00050025	1.20219
DNA-directed RNA polymerase II, holoenzyme	1	1	0.000120279	0.000125063	0.961751
DNA-directed RNA polymerase III complex	1	1	0.000120279	0.000125063	0.961751
DNA-directed RNA polymerase IV complex	4	4	0.000481116	0.00050025	0.961751
DNA-directed RNA polymerase V complex	2	2	0.000240558	0.000250125	0.961751
early endosome	1	1	0.000120279	0.000125063	0.961751
endomembrane system	1	1	0.000120279	0.000125063	0.961751
endoplasmic reticulum	103	99	0.0123887	0.0123812	1.00061
endoplasmic reticulum lumen	2	3	0.000240558	0.000375188	0.641168
endoplasmic reticulum membrane	14	13	0.00168391	0.00162581	1.03573
endosome	16	18	0.00192446	0.00225113	0.85489
endosome membrane	1	2	0.000120279	0.000250125	0.480876
eukaryotic translation initiation factor 2 complex	1	1	0.000120279	0.000125063	0.961751
eukaryotic translation initiation factor 3 complex	2	3	0.000240558	0.000375188	0.641168
eukaryotic translation initiation factor 4F complex	0	1	0	0.000125063	NA
exocyst	22	21	0.00264614	0.00262631	1.00755
exocytic vesicle	2	1	0.000240558	0.000125063	1.9235
extracellular region	104	105	0.012509	0.0131316	0.952592
extracellular space	3	3	0.000360837	0.000375188	0.961751
extrinsic to membrane	21	17	0.00252586	0.00212606	1.18805
F-actin capping protein complex	2	1	0.000240558	0.000125063	1.9235
glycerol-3-phosphate dehydrogenase complex	5	7	0.000601395	0.000875438	0.686965
glycine cleavage complex	2	1	0.000240558	0.000125063	1.9235
glyoxysome	1	2	0.000120279	0.000250125	0.480876
Golgi apparatus	76	77	0.00914121	0.00962981	0.949261
Golgi apparatus part	2	2	0.000240558	0.000250125	0.961751
Golgi membrane	9	8	0.00108251	0.0010005	1.08197
Golgi stack	3	3	0.000360837	0.000375188	0.961751
Golgi-associated vesicle	2	2	0.000240558	0.000250125	0.961751
GPI-anchor transamidase complex	1	2	0.000120279	0.000250125	0.480876
holo TFIIH complex	1	0	0.000120279	0	NA
integral to chloroplast outer membrane	1	0	0.000120279	0	NA
integral to Golgi membrane	5	4	0.000601395	0.00050025	1.20219
integral to membrane	1095	1055	0.131706	0.131941	0.998216
integral to peroxisomal membrane	1	2	0.000120279	0.000250125	0.480876
integral to plasma membrane	3	3	0.000360837	0.000375188	0.961751
intracellular	688	648	0.082752	0.0810405	1.02112
intracellular membrane-bounded organelle	5	4	0.000601395	0.00050025	1.20219
intrinsic to endoplasmic reticulum membrane	16	18	0.00192446	0.00225113	0.85489
intrinsic to membrane	35	34	0.00420977	0.00425213	0.990038
large ribosomal subunit	26	21	0.00312726	0.00262631	1.19074
late endosome	1	1	0.000120279	0.000125063	0.961751
light-harvesting complex	1	0	0.000120279	0	NA
lipid particle	4	4	0.000481116	0.00050025	0.961751
longitudinal side of cell surface	1	1	0.000120279	0.000125063	0.961751
lysosome	7	5	0.000841953	0.000625313	1.34645
mediator complex	8	5	0.000962232	0.000625313	1.5388
membrane	1376	1338	0.165504	0.167334	0.989066
membrane coat	22	23	0.00264614	0.00287644	0.919936
membrane fraction	1	1	0.000120279	0.000125063	0.961751
microsome	1	3	0.000120279	0.000375188	0.320584
microtubule	69	67	0.00829925	0.00837919	0.99046
microtubule associated complex	6	5	0.000721674	0.000625313	1.1541
microtubule cytoskeleton	1	0	0.000120279	0	NA
microtubule organizing center	7	9	0.000841953	0.00112556	0.748029
mitochondrial envelope	4	4	0.000481116	0.00050025	0.961751
mitochondrial inner membrane	65	65	0.00781814	0.00812906	0.961751
mitochondrial inner membrane presequence translocase complex	2	3	0.000240558	0.000375188	0.641168
mitochondrial intermembrane space	0	1	0	0.000125063	NA
mitochondrial intermembrane space protein transporter complex	2	2	0.000240558	0.000250125	0.961751
mitochondrial matrix	11	11	0.00132307	0.00137569	0.961751
mitochondrial membrane	1	3	0.000120279	0.000375188	0.320584
mitochondrial outer membrane	8	10	0.000962232	0.00125063	0.769401
mitochondrial outer membrane translocase complex	1	1	0.000120279	0.000125063	0.961751
mitochondrial proton-transporting ATP synthase complex, coupling factor F(o)	4	3	0.000481116	0.000375188	1.28234
mitochondrial respiratory chain	1	1	0.000120279	0.000125063	0.961751
mitochondrial respiratory chain complex III	1	1	0.000120279	0.000125063	0.961751
mitochondrial ribosome	1	0	0.000120279	0	NA
mitochondrion	200	173	0.0240558	0.0216358	1.11185
molybdopterin synthase complex	1	1	0.000120279	0.000125063	0.961751
monolayer-surrounded lipid storage body	8	8	0.000962232	0.0010005	0.961751
Mre11 complex	2	1	0.000240558	0.000125063	1.9235
MutSalpha complex	1	1	0.000120279	0.000125063	0.961751
MutSbeta complex	1	1	0.000120279	0.000125063	0.961751
myosin complex	17	14	0.00204474	0.00175088	1.16784
NAD(P)H dehydrogenase complex (plastoquinone)	5	4	0.000601395	0.00050025	1.20219
nuclear body	1	1	0.000120279	0.000125063	0.961751
nuclear chromosome	5	5	0.000601395	0.000625313	0.961751
nuclear chromosome, telomeric region	2	2	0.000240558	0.000250125	0.961751
nuclear dicing body	1	0	0.000120279	0	NA
nuclear envelope	4	4	0.000481116	0.00050025	0.961751
nuclear envelope-endoplasmic reticulum network	1	1	0.000120279	0.000125063	0.961751
nuclear membrane	4	4	0.000481116	0.00050025	0.961751
nuclear origin of replication recognition complex	3	3	0.000360837	0.000375188	0.961751
nuclear pore	19	18	0.0022853	0.00225113	1.01518
nuclear replisome	1	1	0.000120279	0.000125063	0.961751
nuclear speck	7	6	0.000841953	0.000750375	1.12204
nucleoid	8	8	0.000962232	0.0010005	0.961751
nucleolus	29	33	0.00348809	0.00412706	0.845175
nucleoplasm	4	5	0.000481116	0.000625313	0.769401
nucleosome	28	25	0.00336781	0.00312656	1.07716
nucleus	1281	1281	0.154077	0.160205	0.961751
oligosaccharyltransferase complex	1	1	0.000120279	0.000125063	0.961751
organelle inner membrane	1	1	0.000120279	0.000125063	0.961751
origin recognition complex	6	5	0.000721674	0.000625313	1.1541
ornithine carbamoyltransferase complex	1	1	0.000120279	0.000125063	0.961751
outer membrane	3	5	0.000360837	0.000625313	0.577051
outer membrane-bounded periplasmic space	2	4	0.000240558	0.00050025	0.480876
oxoglutarate dehydrogenase complex	1	1	0.000120279	0.000125063	0.961751
oxygen evolving complex	11	11	0.00132307	0.00137569	0.961751
perinuclear region of cytoplasm	0	1	0	0.000125063	NA
periplasmic space	0	1	0	0.000125063	NA
peroxisomal membrane	6	7	0.000721674	0.000875438	0.824358
peroxisome	22	24	0.00264614	0.0030015	0.881605
phosphoinositide 3-kinase complex	1	0	0.000120279	0	NA
phosphopyruvate hydratase complex	1	1	0.000120279	0.000125063	0.961751
photosystem	1	1	0.000120279	0.000125063	0.961751
photosystem I	6	6	0.000721674	0.000750375	0.961751
photosystem I reaction center	2	1	0.000240558	0.000125063	1.9235
photosystem II	7	6	0.000841953	0.000750375	1.12204
phragmoplast	5	7	0.000601395	0.000875438	0.686965
plant-type cell wall	22	20	0.00264614	0.00250125	1.05793
plant-type vacuole	4	4	0.000481116	0.00050025	0.961751
plant-type vacuole membrane	8	7	0.000962232	0.000875438	1.09914
plasma membrane	241	228	0.0289873	0.0285143	1.01659
plasma membrane light-harvesting complex	1	0	0.000120279	0	NA
plasma membrane of cell tip	1	1	0.000120279	0.000125063	0.961751
plasmodesma	2	0	0.000240558	0	NA
plastid	188	164	0.0226125	0.0205103	1.1025
plastid chromosome	6	5	0.000721674	0.000625313	1.1541
plastid envelope	1	2	0.000120279	0.000250125	0.480876
plastid inner membrane	2	1	0.000240558	0.000125063	1.9235
plastid large ribosomal subunit	0	1	0	0.000125063	NA
plastid outer membrane	1	0	0.000120279	0	NA
plastid ribosome	1	0	0.000120279	0	NA
plastid stroma	2	1	0.000240558	0.000125063	1.9235
plastoglobule	3	3	0.000360837	0.000375188	0.961751
prefoldin complex	7	8	0.000841953	0.0010005	0.841532
preribosome, small subunit precursor	1	1	0.000120279	0.000125063	0.961751
proteasome complex	31	33	0.00372865	0.00412706	0.903463
proteasome core complex	13	15	0.00156363	0.00187594	0.833518
proteasome regulatory particle	1	0	0.000120279	0	NA
protein body	0	1	0	0.000125063	NA
protein complex	17	14	0.00204474	0.00175088	1.16784
protein kinase CK2 complex	2	1	0.000240558	0.000125063	1.9235
protein phosphatase type 1 complex	0	1	0	0.000125063	NA
protein phosphatase type 2A complex	11	11	0.00132307	0.00137569	0.961751
protein serine/threonine phosphatase complex	35	32	0.00420977	0.004002	1.05192
proteinaceous extracellular matrix	18	20	0.00216502	0.00250125	0.865576
proton-transporting ATP synthase complex, catalytic core F(1)	13	9	0.00156363	0.00112556	1.3892
proton-transporting ATP synthase complex, coupling factor F(o)	3	3	0.000360837	0.000375188	0.961751
proton-transporting two-sector ATPase complex	5	3	0.000601395	0.000375188	1.60292
proton-transporting two-sector ATPase complex, catalytic domain	8	6	0.000962232	0.000750375	1.28234
proton-transporting two-sector ATPase complex, proton-transporting domain	9	8	0.00108251	0.0010005	1.08197
proton-transporting V-type ATPase, V0 domain	4	4	0.000481116	0.00050025	0.961751
proton-transporting V-type ATPase, V1 domain	3	3	0.000360837	0.000375188	0.961751
PSII associated light-harvesting complex II	1	1	0.000120279	0.000125063	0.961751
pyruvate dehydrogenase complex	2	2	0.000240558	0.000250125	0.961751
respiratory chain	11	10	0.00132307	0.00125063	1.05793
respiratory chain complex I	0	1	0	0.000125063	NA
retromer complex	1	1	0.000120279	0.000125063	0.961751
riboflavin synthase complex	1	1	0.000120279	0.000125063	0.961751
ribonucleoprotein complex	168	158	0.0202069	0.0197599	1.02262
ribonucleoside-diphosphate reductase complex	1	1	0.000120279	0.000125063	0.961751
ribosome	247	221	0.0297089	0.0276388	1.0749
RNA polymerase complex	2	2	0.000240558	0.000250125	0.961751
RNA-induced silencing complex	1	1	0.000120279	0.000125063	0.961751
SCAR complex	1	1	0.000120279	0.000125063	0.961751
SCF ubiquitin ligase complex	1	0	0.000120279	0	NA
signal peptidase complex	2	2	0.000240558	0.000250125	0.961751
signal recognition particle	7	6	0.000841953	0.000750375	1.12204
signal recognition particle receptor complex	1	1	0.000120279	0.000125063	0.961751
signal recognition particle, endoplasmic reticulum targeting	2	2	0.000240558	0.000250125	0.961751
small nucleolar ribonucleoprotein complex	1	1	0.000120279	0.000125063	0.961751
small ribosomal subunit	21	16	0.00252586	0.002001	1.2623
small-subunit processome	8	7	0.000962232	0.000875438	1.09914
SNARE complex	0	1	0	0.000125063	NA
soluble fraction	2	3	0.000240558	0.000375188	0.641168
spindle	4	6	0.000481116	0.000750375	0.641168
spindle microtubule	2	1	0.000240558	0.000125063	1.9235
spindle pole	7	8	0.000841953	0.0010005	0.841532
spliceosomal complex	8	6	0.000962232	0.000750375	1.28234
stromule	0	1	0	0.000125063	NA
thylakoid	33	27	0.00396921	0.00337669	1.17547
thylakoid lumen	3	5	0.000360837	0.000625313	0.577051
thylakoid membrane	5	4	0.000601395	0.00050025	1.20219
Tic complex	0	1	0	0.000125063	NA
transcription factor complex	6	7	0.000721674	0.000875438	0.824358
transcription factor TFIIA complex	2	3	0.000240558	0.000375188	0.641168
transcription factor TFIID complex	4	3	0.000481116	0.000375188	1.28234
transcription factor TFIIE complex	1	1	0.000120279	0.000125063	0.961751
transcription factor TFIIF complex	2	2	0.000240558	0.000250125	0.961751
trans-Golgi network	2	2	0.000240558	0.000250125	0.961751
tricarboxylic acid cycle enzyme complex	1	1	0.000120279	0.000125063	0.961751
tubulin complex	1	1	0.000120279	0.000125063	0.961751
ubiquitin ligase complex	53	54	0.00637479	0.00675338	0.943941
vacuolar membrane	5	5	0.000601395	0.000625313	0.961751
vacuolar proton-transporting V-type ATPase complex	2	2	0.000240558	0.000250125	0.961751
vacuolar proton-transporting V-type ATPase, V1 domain	1	1	0.000120279	0.000125063	0.961751
vacuole	61	56	0.00733702	0.0070035	1.04762
viral capsid	3	4	0.000360837	0.00050025	0.721313
viral envelope	4	3	0.000481116	0.000375188	1.28234
voltage-gated potassium channel complex	5	4	0.000601395	0.00050025	1.20219
