# Supplementary material for: The Genome Sequence of the North-European Cucumber (Cucumis sativus L.) Unravels Evolutionary Adaptation Mechanisms in Plants
Source: PLoS One. 2011 Jul 28;6(7):e22728. doi: 10.1371/journal.pone.0022728 (PMC3145757; doi:10.1371/journal.pone.0022728)
Supplement: Table S1 — Characteristics of BAC end sequences (BESs). Characteristics of BESs obtained from two BAC libraries of B10 line of cucumber. BESs were trimmed and screened for contamination with vector and bacterial genomes using Lucy v1.20 and BLAST. BLAST was also used to find chloroplast and mitochondrion genome sequences. (XLS) [file pone.0022728.s018.xls]

## Sheet: Arkusz1
Table S1. Characteristics of BAC end sequences (BESs).
Feature	Count	%
BAC clones	33792	-
Estimated BES number	67584	100
Obtained BES number	66776	98.8
Low quality sequences	1823	2.73
Sequences shorter than 30 bp	147	0.22
Vector contamination	194	0.29
Good quality sequences	64610	96.76
Paired ends good quality sequences	62219	96.3
Chloroplastome sequences	2093	3.24
Mitochondrial sequences	297	0.46
Nuclear sequences	62217	93.17
Average length of nuclear BES	737	-
Total length of nuclear BESs	45853929	-
Genome coverage in BESs	-	12.49
