# Supplementary material for: The Genome Sequence of the North-European Cucumber (Cucumis sativus L.) Unravels Evolutionary Adaptation Mechanisms in Plants
Source: PLoS One. 2011 Jul 28;6(7):e22728. doi: 10.1371/journal.pone.0022728 (PMC3145757; doi:10.1371/journal.pone.0022728)
Supplement: Table S5 — Characteristics of microsatellite sequences (SSRs) coming from BESs and genome contigs of the B10 line. SSRs (mono- to octanucleotides) longer than 12 nt, with at least 3 repeat unitswere searched in BES and genome contigs of the B10 line using the MISA software. The table shows the minimum of four most frequent motifs for each motif group. The SSR density were calculated as count per Mbp. (XLS) [file pone.0022728.s022.xls]

## Sheet: Arkusz2
Table S5. Characteristics of microsatellite sequences (SSRs) coming from BESs and genome contigs of the B10 line.
Nucleotide motifs		Length in contigs	Length in BESs	% of length in contigs	% of length in BESs	Count in contigs	Count in BESs	% of count in contigs	% of count in BESs	SSRs density in contigs	SSRs density in BESes	Repeat number in contigs	Repeat number in BESes
		1866671	347416	0.95	0.73	122398	22529	100	100	619.99	476.16	5.38	5.49
mono-	Total	183565	90029	9.83	25.91	13036	5725	0.106505	0.254117	66.03	121	14.48	15.42
	A			96.77	97.07
	C			3.23	2.93
di-	Total	466130	70012	24.97	20.15	26809	4085	0.219031	0.181322	135.8	86.34	7.72	7.86
	AT			72.12	69.63
	AG			20.05	20.79
	AC			7.76	8.52
	CG			0.07	1.06
tri-	Total	413385	64686	22.15	18.62	28543	4429	0.233198	0.196591	144.58	93.61	4.67	4.62
	AAT			47.17	42.23
	AAG			31.68	32.51
	ATC			4.91	5.89
	AAC			4.7	4.8
tetra-	Total	436064	66980	23.36	19.28	33770	5222	0.275903	0.23179	171.06	110.37	3.18	3.14
	AAAT			37.04	35.65
	AAAG			19.25	20.46
	AATT			14.52	12.12
	AAAC			7.25	7.45
penta-	Total	179675	26740	9.63	7.7	11228	1675	0.0917335	0.0743486	56.87	35.4	3.17	3.2
	AAAAG			26.44	30.12
	AAAAT			22.36	17.71
	AAATT			8.55	8.43
	AAAAC			6.41	8.36
hexa-	Total	122256	18612	6.55	5.36	6250	952	0.0510629	0.0422566	31.66	20.12	3.29	3.24
	AAAAAG			18.44	16.38
	AAAAAT			8.74	6.51
	AAAAAC			4.99	6.67
	AAAATT			3.03	2.16
	AAATTG			0.7	2.87
hepta-	Total	47852	7693	2.56	2.21	2073	336	0.0169366	0.0149141	10.5	7.1	3.33	3.28
	AAAAAAG			9.83	15.74
	AAAAAAT			4.2	5.46
	AAAATTT			3.5	3.28
	AAAGAAG			3.09	1.73
	AAACCCT			3.48	7.37
octa-	Total	17744	2664	0.95	0.77	689	105	0.00562918	0.00466066	3.49	2.22	3.2	3.17
	AAAGAGAG			4.37	5.71
	AAAAAAAG			4.78	15.92
	AAAAGAAG			2.16	0.9
	AAAGAAAT			1.85	1.2
	ATCCATCG			0.14	2.7
	AAAAAAGG			0.27	1.8
	AAAAAATG			0.54	1.8
	AAAAAATT			0.68	1.8
	AAAACTTC			0.27	1.8
	AAAATAAT			0.41	1.8
	AAAGCAAC			0.14	1.8
	AAATGGTG			0.27	1.8
	AACACTCC			0.14	1.8
	AATCTCCC			0.27	1.8
	ACACATGC			0.14	1.8
	AGAGATGG			0.41	1.8
