# Supplementary material for: The Genome Sequence of the North-European Cucumber (Cucumis sativus L.) Unravels Evolutionary Adaptation Mechanisms in Plants
Source: PLoS One. 2011 Jul 28;6(7):e22728. doi: 10.1371/journal.pone.0022728 (PMC3145757; doi:10.1371/journal.pone.0022728)
Supplement: Table S7 — Detailed results of anchoring the sequences from both assembly versions on chromosomes using different methodologies. aThe Arachne (version B) assembly was anchored on chromosomes using both the Arachne package specific scripts and BLAST aligning. The Celera (version A) genome sequence was anchored on chromosomes only with the use of BLAST. bCross-mapping results of Celera vs Arachne genome sequence on chromosomes. The first number represents the Arachne (version B) assembly and the second number represents the Celera (version A) assembly. (XLS) [file pone.0022728.s024.xls]

## Sheet: Arkusz1
Table S7. Detailed results of anchoring the sequences from both assembly versions on chromosomes using different methodologies.
Feature	454 + Sanger – Celera (A version) - BLASTa		454 + Sanger – Celera + Arachne (B version step2) - BLASTa		454 + Sanger – Celera + Arachne (B version step2) - Arachnea		454 + Sanger – A & B versions together - BLASTa
	Count	%	Count	%	Count	%	Count	%
Markers mapped uniquely on contigs	1700	90.28	1665	88.42	1642	87.2	1701	90.33
Number of markers per scaffold	10.12	-	2.01	-	2.05	-	0,18 / 10,07	-
Number of scaffolds anchored on chromosomes	168	4.03	828	6.31	802	6.11	9 358 / 169b	71,28 / 4,05b
Total scaffolds length anchored on chromosomes (Mbp)	207	92.41	160	49.54	160	49.54	300	92.88
Number of contigs anchored on chromosomes	10957	69.94	3082	18.63	3057	18.47	11 878 / 9 456b	71,78 / 60,36b
Total contigs length anchored on chromosomes (Mbp)	182	92.39	80	41.45	80	41.45	163	84.46
