# Supplementary material for: The Genome Sequence of the North-European Cucumber (Cucumis sativus L.) Unravels Evolutionary Adaptation Mechanisms in Plants
Source: PLoS One. 2011 Jul 28;6(7):e22728. doi: 10.1371/journal.pone.0022728 (PMC3145757; doi:10.1371/journal.pone.0022728)
Supplement: Table S11 — SNP and In/Del polymorphism differences between B10 and 9930 line genotypes. SNP polymorphisms were identified using the MUMmer 3.20 software between genomic contigs of B10 line and 9930 line genomes of minimum 1 Kbp length. (XLS) [file pone.0022728.s028.xls]

## Sheet: Arkusz1
Table S11. SNP and In/Del polymorphism differences between B10 and 9930 line genotypes.
SNPs in	SNP count	SNP frequency per 1Kbp	No. of B10 Insertions (9930 Deletions)	Frequency of B10 Insertions (9930 Deletions)	No. of B10 Deletions (9930 Insertions)	Frequency of B10 Deletions (9930 Insertions)	Insertions/Deletions ratio in B10 line
Whole assembled genome	811274	4.22	156852	0.82	328196	1.71	0.48x
Genes (CDSs)	196845	2.48	31782	0.4	76577	0.97	0.41x
Exons	45449	1.6	7405	0.26	9179	0.32	0.81x
Genes promotor regions (1000 bp)	79716	3.85	16261	0.78	33595	1.62	0.48x
