# Supplementary material for: The Genome Sequence of the North-European Cucumber (Cucumis sativus L.) Unravels Evolutionary Adaptation Mechanisms in Plants
Source: PLoS One. 2011 Jul 28;6(7):e22728. doi: 10.1371/journal.pone.0022728 (PMC3145757; doi:10.1371/journal.pone.0022728)
Supplement: Table S12 — Table S11_5 - Deteiled characteristics of different length In/Del polimorphism: 1–2 bp (ultra), 3–10 bp (mikro), 11–50 bp (mini), 51–100 bp (midi). (XLS) [file pone.0022728.s029.xls]

## Sheet: Arkusz1
Table S12 - Deteiled characteristics of different length In/Del polimorphism: 1-2 bp (ultra), 3–10 bp (mikro), 11–50 bp (mini), 51–100bp (midi).
In/Dels length [bp]	No. of B10 Insertions (9930 Deletions)	Frequency of B10 Insertions (9930 Deletions)	No. of B10 Deletions (9930 Insertions)	Frequency of B10 Deletions (9930 Insertions)	Insertions/Deletions ratio in B10 line
	Whole assembled genome
1-2	93889	0.4876	277673	1.4451	0.34x
3-10	37549	0.1955	37947	0.1976	0.99x
11-50	23556	0.1226	12234	0.0637	1.92x
> 51	1858	0.0097	432	0.0022	4.41x
	Genes (CDSs)
1-2	18746	0.2364	67250	0.8482	0.28x
3-10	7302	0.0921	7162	0.0903	1.02x
11-50	5251	0.0662	2083	0.0263	2.52x
> 51	483	0.0061	82	0.001	6.1x
	Exons
1-2	3521	0.1237	4963	0.1743	0.71x
3-10	2234	0.0785	2174	0.0764	1.03x
11-50	1268	0.0445	1287	0.0452	0.98x
> 51	382	0.0134	755	0.0265	0.51x
	Genes promotor regions (1000 bp)
1-2	9882	0.476	28630	1.3793	0.35x
3-10	4838	0.233	3820	0.184	1.27x
11-50	2275	0.1096	1104	0.0532	2.06x
> 51	171	0.0082	41	0.002	4.1x
